# Supplementary material
Source: publisher figshare collection journal article supplement (https://acs.figshare.com/ndownloader/files/21950733)

# Evolution of a Strategy for the Enantioselective Synthesis of (-)-Cajanusine

Renyu Guo, Brittany P. Witherspoon and M. Kevin Brown\*

*Department of Chemistry, Indiana University  
800 E. Kirkwood Avenue, Bloomington, IN 47401*

## Supplementary Information – Table of Contents

|                                                       |     |
|-------------------------------------------------------|-----|
| General.....                                          | S2  |
| Reagents and Catalysts .....                          | S3  |
| Reaction Optimizations.....                           | S6  |
| Experimental Procedures.....                          | S10 |
| NMR Studies of Cajanusine.....                        | S37 |
| Natural Sample Comparisons.....                       | S38 |
| Coordinates and Energies for Computed Structures..... | S40 |
| References.....                                       | S46 |
| Spectrums.....                                        | S48 |

## General:

$^1\text{H}$  NMR spectra were recorded at room temperature on a Varian I400 (400 MHz), Varian VXR400 (400 MHz), Varian I500 (500 MHz), or a Varian I600 (600 MHz) spectrometer. Chemical shifts are reported in ppm from tetramethylsilane with the residual solvent resonance as the internal standard ( $\text{CDCl}_3$ : 7.26 ppm). Data are reported as follows: chemical shift, multiplicity (s = singlet, d = doublet, t = triplet, q = quartet, br = broad, m = multiplet), coupling constants (Hz), and integration.  $^{13}\text{C}$  NMR spectra were recorded on a Varian I400 (101 MHz) and a Varian I500 (126 MHz) spectrometer with complete proton decoupling. Chemical shifts are reported in ppm from tetramethylsilane with the solvent resonance as the internal standard ( $\text{CDCl}_3$ : 77.16 ppm). Infrared (IR) spectra were recorded on a Bruker Tensor II FT-IR Spectrometer,  $\nu_{\text{max}}$  in  $\text{cm}^{-1}$ . Bands are characterized as broad (br), strong (s), medium (m), and weak (w). Melting points were obtained on a Thomas Hoover capillary melting point apparatus without correction. High Resolution Mass Spectrometry (HRMS) analysis was obtained using Electron Impact Ionization (EI), Chemical Ionization (CI), Atmospheric Pressure Chemical Ionization (APCI) or Electrospray Ionization (ESI) and reported as  $m/z$  (relative intensity). ESI was acquired using a Waters/Micromass LCT Classic (ESI-TOF). Optical rotations were measured on a Perkin-Elmer 241 polarimeter at 589 nm wavelength (sodium D-line) using a standard 10 cm cell (1 mL). Specific rotations,  $[\alpha]_{\text{D}}^{20}$ , are reported in degree  $\text{mL}/(\text{g}\cdot\text{dm})$  at the specific temperature. Concentrations (c) are given in grams per 100 mL of the specific solvent. The diastereomeric and regioisomeric ratios were determined using NMR or GC-MS analysis of unpurified reaction mixtures. Unless otherwise noted, all reactions have been carried out with distilled and degassed solvents under an atmosphere of dry  $\text{N}_2$  in oven- (150 °C) and flame-dried glassware with standard vacuum-line techniques. Dichloromethane (DCM), Tetrahydrofuran (THF), Diethyl ether ( $\text{Et}_2\text{O}$ ), dioxane and Dimethylformamide (DMF) were purified under a positive pressure of dry argon by passage through two columns of activated alumina. Toluene (PhMe) was purified under a positive pressure of dry argon by passage through columns of activated alumina and Q5 (Grubbs apparatus). Benzene (PhH) and Nitromethane ( $\text{MeNO}_2$ ) was distilled over  $\text{CaH}_2$ . All work-up and purification procedures were carried out with reagent grade solvents in air. Standard flash column chromatography (FCC) techniques using ZEOprep 60/40-63  $\mu\text{m}$  silica gel were used for purification. For difficult separations medium pressure liquid chromatography (MPLC) was performed using a Teledyne ISCO CombiFlash Rf 150 instrument. Chiral HPLC analysis was performed on an Agilent 1220 Infinity LC system using chiral column eluted with a mixture of hexane and isopropyl alcohol.

## Reagents and Catalysts:

**Allyl acetate** was purchased from Sigma-Aldrich and used as received.

**Allylpalladium(II) chloride dimer**  $[\text{Pd}(\text{allyl})\text{Cl}]_2$  was purchased from Sigma-Aldrich and used as received.

**Ammonium acetate** was purchased from Mallinckrodt and used as received.

**2,2'-Bipyridyl (bpy)** was purchased from Combi-Blocks and used as received.

**Bismuth(III) trifluoromethanesulfonate** was purchased from Matrix Scientific and used as received.

**Bis(pinacolato)diboron** was purchased from Oakwood Chemical and used as received.

**1-(3,5-Bis(trifluoromethyl)phenyl)-3-((S)-(6-methoxyquinolin-4-yl)((1S,2S,4S,5R)-5-vinylquinuclidin-2-yl)methyl)thiourea** was synthesized via known literature.<sup>1</sup>

**Boron tribromide solution (1 M in DCM)** was purchased from Alfa-Aesar and used as received.

**Boron trifluoride diethyl etherate** was purchased from Sigma-Aldrich and used as received.

**Bromotrichloromethane** was purchased from Oakwood Chemical and used as received.

**1-Bromo-3,5-dimethoxybenzene** was purchased from Combi-Blocks and used as received.

**tert-Butanol** was purchased from Alfa-Aesar and used as received.

**tert-Butyldimethylsilyl chloride (TBSCl)** was purchased from Oakwood Chemical and used as received.

**n-Butyllithium solution** was purchased from Sigma-Aldrich and titrated before every use.

**t-Butyllithium solution** was purchased from Sigma-Aldrich and titrated before every use.

**Chloro(1,5-cyclooctadiene)rhodium(I) dimer** was purchased from Strem and used as received.

**Chromic acid (Jones' reagent)** was prepared via known literature.<sup>2</sup>

**Copper(I) chloride** was purchased from Strem and used as received.

**Copper(I) iodide** was purchased from Strem and used as received.

**1,8-Diazabicyclo(5.4.0)undec-7-ene (DBU)** was purchased from Oakwood Chemical and used as received.

**Dibromobis(triphenylphosphine)nickel(II)** was purchased from Strem and used as received.

**Dibromomethane** was purchased from Oakwood Chemical and used as received.

**Dichloro[1,3-bis(2,4,6-trimethylphenyl)-2-imidazolidinylidene](2-isopropoxy phenylmethylene)ruthenium(II) (Hoveyda-Grubbs II)** was purchased from Sigma-Aldrich and used as received.

**Dichlorobis(triphenylphosphine)nickel(II)** was prepared via known literature.<sup>3</sup>

**Dicyclohexylcarbodiimide (DCC)** was purchased from Oakwood Chemical and used as received.

**3,4-Dihydro-2H-pyran** was purchased from Sigma-Aldrich and used as received.

**3,5-Dimethoxybenzaldehyde** was purchased from Shaoyuan Chemical and used as received.

**4,7-Dimethoxy-1,10-phenanthroline (4,7-diOMeBPhen)** was purchased from Strem and used as received.

**4-(Dimethylamino)pyridine (DMAP)** was purchased from Oakwood Chemical and used as received.

**4,7-Diphenyl-1,10-phenanthroline (BPhen)** was purchased from Strem and used as received.

**4,4'-Di-*tert*-butyl-2,2'-dipyridyl (dtbbpy)** was purchased from Combi-Blocks and used as received.

**Ethanethiol** was purchased from Alfa-Aesar and used as received.

**Ethylenebis(diphenylphosphine) (dppe)** was purchased from Sigma-Aldrich and used as received.

**Imidazole** was purchased from Oakwood Chemical and used as received.

**Iodine** was purchased from Alfa-Aesar and used as received.

**2-Iodoxybenzoic acid (IBX)** was prepared via known literature.<sup>4</sup>

**Iodoform** was purchased from TCI and used as received.

**[Ir(dFCF<sub>3</sub>ppy)<sub>2</sub>dtbbpy]PF<sub>6</sub>** was purchased from Strem and used as received.

**2-Isopropoxy-4,4,5,5-tetramethyl-1,3,2-dioxaborolane (pinB-OiPr)** was purchased from Oakwood Chemical and used as received.

**Lithium chloride** was purchased from VWR. It was heated with heat gun under high-vac for 10 min and stored in glovebox before use.

**Lithium hydroxide monohydrate** was purchased from Oakwood Chemical and used as received.

**Magnesium turning** was purchased from Strem and used as received.

**2-Mercaptopyridine *N*-oxide** was purchased from Chem-Inpex and used as received.

**4-Methoxypyridine *N*-oxide (MPO)** was purchased from Sigma-Aldrich and used as received.

**2-Methyl-2-butene** was purchased from Oakwood Chemical and used as received.

**2-Methylpropene (isobutylene)** was purchased from Sigma-Aldrich and used as received.

***N*-Hydroxytetrachlorophthalimide (TCNHPI)** was purchased from Sigma-Aldrich and used as received.

***N*-Hydroxyphthalimide (NHPI)** was purchased from Sigma-Aldrich and used as received.

***N*-Methylimidazole (NMI)** was purchased from Alfa-Aesar and used as received.

**Nickel chloride ethylene glycol dimethyl ether complex (NiCl<sub>2</sub>·DME)** was purchased from Strem and used as received.

**(Oxydi-2,1-phenylene)bis(diphenylphosphine) (DPEPhos)** was purchased from Strem and used as received.

**1,2,2,6,6-Pentamethylpiperidine (*N*-MePMP)** was purchased from Sigma-Aldrich and distilled over CaH<sub>2</sub> before use.

***E*-Phenylethenylboronic acid** was purchased from Combi-Blocks and used as received.

**Phenylmagnesium bromide solution (3.0 M in diethyl ether)** was purchased from Sigma-Aldrich and used as received.

**Potassium carbonate** was purchased from VWR and used as received.

**Sodium carbonate** was purchased from VWR and used as received.



**Sodium chlorite** was purchased from VWR and used as received.

**Sodium hydride (60 % dispersion in mineral oil)** was purchased from Sigma-Aldrich and used as received.

**Sodium perborate tetrahydrate** was purchased from Merck KGaA and used as received.

**Sodium periodate** was purchased from Sigma-Aldrich and used as received.

**Sodium phosphate mono-basic monohydrate** was purchased from Macron Chemical and used as received.

**Sodium *tert*-butoxide** was purchased from Strem and used as received.

**Tetrabromomethane** was purchased from Oakwood chemical and dried over anhydrous  $\text{MgSO}_4$  before use.

**Tetrabutylammonium fluoride (TBAF, 1M in THF)** was purchased from Sigma-Aldrich and used as received.

**2,2,6,6-Tetramethyl-1-piperidinyloxy (TEMPO)** was purchased from Sigma-Aldrich and used as received.

**1,1,1-Triacetoxy-1,1-dihydro-1,2-benziodoxol-3(1H)-one (DMP)** was purchased from Chem-Impex and used as received.

**Triethylaluminum solution (1 M in hexanes)** was purchased from Sigma-Aldrich and used as received.

**Trimethylsilyldiazomethane ( $\text{TMSCHN}_2$ )** was purchased from Sigma-Aldrich and used as received.

**Trimethylsilyl trifluoromethanesulfonate (TMSOTf)** was purchased from Oakwood Chemical and distilled over  $\text{K}_2\text{CO}_3$  before use.

**Triphenylphosphine** was purchased from Oakwood chemical and used as received.

**Tris(trimethylsilyl)silane** was purchased from Alfa-Aesar and used as received.

**Zinc (II) chloride** was purchased from Alfa-Aesar. It was heated with heat gun under high-vac for 10 min and stored in glovebox before use.

## Attempts for conjugate addition:

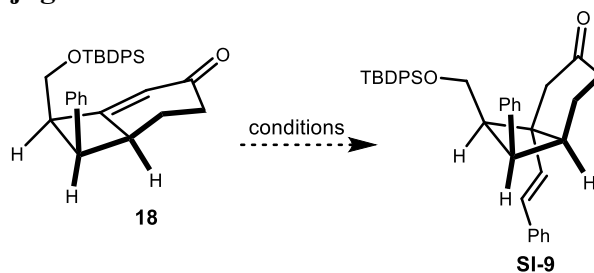

| Nu                                        | [M]/L                                                    | LA <sup>a</sup> /base <sup>b</sup> | solvent                  | T(°C)    | pdt:SM:bypdts <sup>c</sup> |
|-------------------------------------------|----------------------------------------------------------|------------------------------------|--------------------------|----------|----------------------------|
| ref: 5 Ph—C≡C—                            | 10 mol% Ni(COD) <sub>2</sub><br>20 mol% PBU <sub>3</sub> | BEt <sub>3</sub>                   | THF/MeOH                 | 50       | SM only                    |
| ref: 6 Ph—CH=CH—Al(iBu) <sub>2</sub>      | 5 mol% CuCN                                              | -                                  | THF                      | rt       | complex mixture            |
|                                           |                                                          | BF <sub>3</sub> OEt <sub>2</sub>   | THF                      | -78      | complex mixture            |
| ref: 7 Ph—CH=CH—Cu(Th)CN·2Li <sup>+</sup> |                                                          | EtAlCl <sub>2</sub>                | THF                      | -78      | complex mixture            |
|                                           |                                                          | Zn(OTf) <sub>2</sub>               | THF                      | -78      | complex mixture            |
|                                           |                                                          | Bi(OTf) <sub>3</sub>               | THF                      | -78 - rt | SM only                    |
|                                           |                                                          | K <sub>2</sub> CO <sub>3</sub>     | PhMe/H <sub>2</sub> O    | rt       | SM only                    |
|                                           |                                                          | K <sub>2</sub> CO <sub>3</sub>     | THF/H <sub>2</sub> O     | rt       | SM only                    |
|                                           |                                                          | K <sub>2</sub> CO <sub>3</sub>     | dioxane/H <sub>2</sub> O | rt       | 1:2:0                      |
|                                           |                                                          | K <sub>2</sub> CO <sub>3</sub>     | dioxane/H <sub>2</sub> O | 60       | 2:1:0                      |
| Ph—CH=CH—B(OH) <sub>2</sub>               | 5 mmol%<br>[Rh(COD)Cl] <sub>2</sub>                      | Cs <sub>2</sub> CO <sub>3</sub>    | dioxane/H <sub>2</sub> O | 60       | 1.5:1:0                    |
|                                           |                                                          | LiOH                               | dioxane/H <sub>2</sub> O | 60       | pdt only                   |
|                                           |                                                          | KOH                                | dioxane/H <sub>2</sub> O | 60       | 1:1:0.5                    |
|                                           |                                                          | CsOH                               | dioxane/H <sub>2</sub> O | 60       | 2.5:1:0.8                  |
|                                           |                                                          | Et <sub>3</sub> N                  | dioxane/H <sub>2</sub> O | 60       | SM only                    |

Reactions were run on 0.1 mmol scale.

a: 50 mol%; b: 3 eq. c: Crude NMR

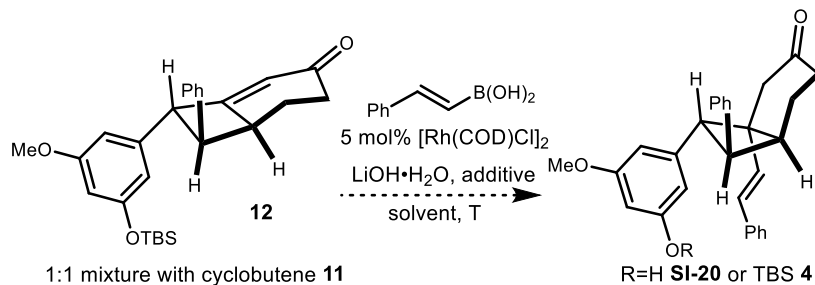

| additive    | solvent                       | T(°C) | yield <sup>a</sup> |
|-------------|-------------------------------|-------|--------------------|
| 20 mol% DBU | PhMe/H <sub>2</sub> O         | 60    | nd                 |
| 20 mol% DBU | dioxane/H <sub>2</sub> O      | 60    | trace              |
| 20 mol% DBU | PhMe/dioxane/H <sub>2</sub> O | 60    | nd                 |
| -           | PhMe/dioxane/H <sub>2</sub> O | 60    | trace              |
| -           | dioxane/H <sub>2</sub> O      | 80    | 9% <b>SI-20</b>    |
| -           | dioxane/H <sub>2</sub> O      | 100   | nd                 |

Reactions were run on 0.1 mmol scale.

a: Isolated yield

No SM could be recycled from above conditions

## Sp<sup>2</sup>-Sp<sup>3</sup> cross coupling with alkyl halides:

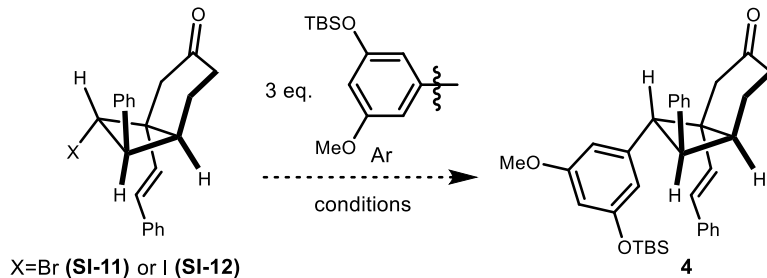

|         | X               | [M]                                                              | L                             | Ar                     | base                            | solvent   | T(°C) | result <sup>a</sup>       |
|---------|-----------------|------------------------------------------------------------------|-------------------------------|------------------------|---------------------------------|-----------|-------|---------------------------|
| Ref: 8  | Br              | -                                                                | -                             | Ar <sub>2</sub> Zn (s) | -                               | PhMe      | rt    | SM                        |
| Ref: 9  | Br              | 5 mol% Ni(COD) <sub>2</sub><br>10 mol% Ni(dtbbpy)Cl <sub>2</sub> | 10 mol% Bpen                  | ArB(OH) <sub>2</sub>   | <i>t</i> BuOK                   | 2-butanol | 60    | complex mixture           |
| Ref: 10 | Br <sup>b</sup> | 1 mol% [Ir(dFCF <sub>3</sub> ppy)dtbbpy]PF <sub>6</sub>          |                               | ArBr                   | Na <sub>2</sub> CO <sub>3</sub> | DME       | rt    | 26% <sup>c</sup> Z-styryl |
| Ref: 11 | Br              | 11 mol% NiL <sub>2</sub> ·xH <sub>2</sub> O<br>3 eq. Mn          | 5 mol% dtbbpy<br>5 mol% dppbz | ArBr                   | pyridine                        | DMPU      | 80    | SM                        |
|         | I               | 11 mol% NiL <sub>2</sub> ·xH <sub>2</sub> O<br>3 eq. Mn          | 5 mol% dtbbpy<br>5 mol% dppbz | ArI                    | pyridine                        | DMPU      | 80    | complex mixture           |

Reactions were run on 0.05 mmol scale.

a: Crude NMR; b: With blue LED irradiation; c: Isolated yield, see text

## Sp<sup>2</sup>-Sp<sup>3</sup> reductive cross coupling with isolated NHPI ester:

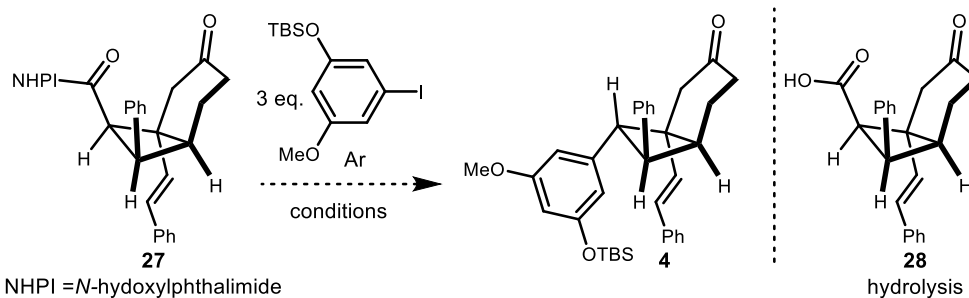

|         | [M]/L                             | reductant <sup>a</sup> | additive | T       | result <sup>b</sup>     |
|---------|-----------------------------------|------------------------|----------|---------|-------------------------|
| Ref: 12 | 10 mol% Ni(dtbbpy)Br <sub>2</sub> | Zn                     | -        | rt      | SM                      |
|         | 10 mol% Ni(dtbbpy)Br <sub>2</sub> | Zn                     | -        | 50 - 80 | hydrolysis              |
|         | 10 mol% Ni(dtbbpy)Br <sub>2</sub> | Mn                     | -        | rt      | SM                      |
| Ref: 13 | 10 mol% Ni(dtbbpy)Br <sub>2</sub> | TDAE                   | -        | rt      | complex mixture         |
| Ref: 14 | 10 mol% Ni(dtbbpy)Br <sub>2</sub> | TDAE                   | TMSBr    | rt      | complex mixture         |
|         | 10 mol% Ni(BPhen)Br <sub>2</sub>  | Zn                     | -        | rt      | SM                      |
|         | 10 mol% Ni(dtbbpy)Br <sub>2</sub> | Zn                     | -        | rt      | hydrolysis <sup>c</sup> |
| Ref: 15 | 10 mol% CuCl 10 mol% DavePhos     | Zn                     | -        | 60      | hydrolysis              |

Reactions were run on 0.05 mmol scale in 1 mL DMA

a: 2 eq. b: Crude NMR c: TCNHPI ester as SM

## Sp<sup>2</sup>-Sp<sup>3</sup> decarboxylative cross coupling with different catalyst systems:

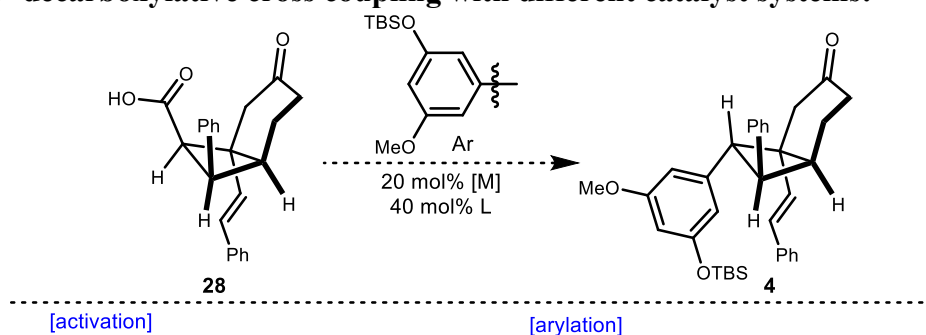

|                                                                                                | [Ni]/Bphen<br>ArB(OH) <sub>2</sub> | [Ni]/dtbbpy<br>ArZnCl | [Fe]/dppbz<br>Ar <sub>2</sub> Zn | [Fe]/DMPU<br>ArMgBr |
|------------------------------------------------------------------------------------------------|------------------------------------|-----------------------|----------------------------------|---------------------|
| 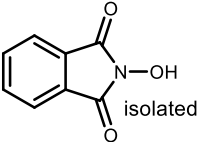<br>isolated  | <1                                 | 3                     | 4                                | <1                  |
| <br>isolated  | <1                                 | 20                    | 11                               | <1                  |
| <br>in situ  | <1                                 | <1                    | <1                               | <1                  |
| <br>in situ | <1                                 | <1                    | 1                                | <1                  |

See Ref 16 for detailed reaction conditions.

Ref: 17

isolated NHPI ester (**27**)

3 eq. ArZnCl  
10 mol% CoBr<sub>2</sub>  
DMI/THF, rt, 12 h

<1

Ref: 18

isolated TCNHPI ester (**20**)

2 eq. Ar<sub>2</sub>Zn  
10 mol% Ni(dpm)<sub>2</sub>·2H<sub>2</sub>O  
DMI/THF, rt, 12 h

<1

color code (%)

<1

1-5

5-15

>15

Reactions were run on 0.05 mmol scale.

Yields were determined by NMR after semi-purification by FCC, using CH<sub>2</sub>Br<sub>2</sub> as internal standard.

For all above reaction conditions, hydrolysis of TCNHPI or NHPI esters were observed.

## Optimizations of decarboxylative Negishi coupling with isolated TCNHPI ester:

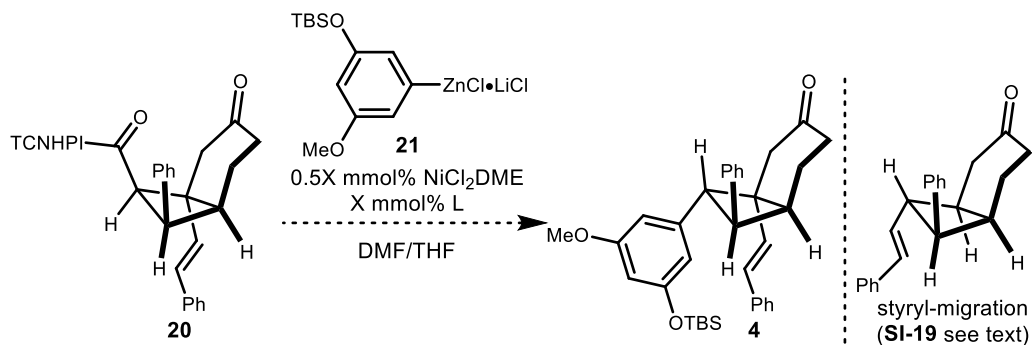

| L                     | [Zn] (0.25 M)      | T  | yield (%) <sup>a</sup> |
|-----------------------|--------------------|----|------------------------|
| 40 mol% dtbbpy        | 3 eq.              | rt | 20                     |
| 40 mol% bpy           | 3 eq.              | rt | <1                     |
| 40 mol% 4,7-diOMebpy  | 3 eq.              | rt | 16                     |
| 40 mol% Phen          | 3 eq.              | rt | 8                      |
| 40 mol% 4,7-diOMePhen | 3 eq.              | rt | 14 + 28 migration      |
| 40 mol% BPhen         | 3 eq.              | rt | 37                     |
| 40 mol% 2,9-diMeBphen | 3 eq.              | rt | 25 + 13 migration      |
| 40 mol% BPhen         | 3 eq.              | 0  | <1                     |
| 40 mol% BPhen         | 3 eq.              | 60 | 26                     |
| 40 mol% BPhen         | 6 eq. <sup>b</sup> | rt | 14                     |
| 80 mol% BPhen         | 3 eq.              | rt | 40                     |
| 200 mol% BPhen        | 3 eq.              | rt | 40                     |

Reactions were run on 0.025 mmol scale

a: After semi-purification by FCC, using CH<sub>2</sub>Br<sub>2</sub> as internal standard

b: 0.5 M

All reactions delivered complex mixtures. TCNHPI ester hydrolysis and styryl migration are the only two products we could identify and isolate.

## Experimental Procedures:

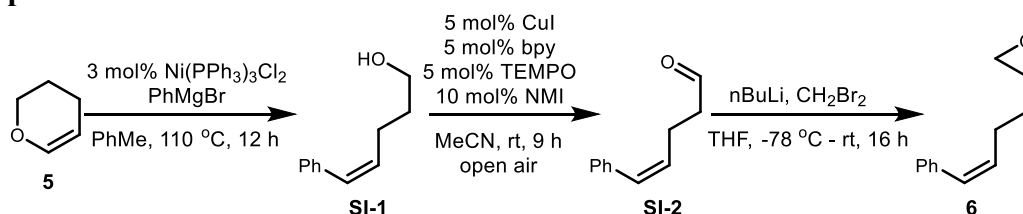

**(Z)-2-(4-Phenylbut-3-en-1-yl)oxirane (6):** Prepared according to a modified procedure of known literature.<sup>19</sup> A flame-dried 1 L round bottom flask equipped with a stir bar was cooled under vacuum. After backfilled with  $\text{N}_2$ , dichlorobis(triphenylphosphine)nickel(II) (2.9 g, 4.5 mmol, 0.030 eq.) was added. The flask was evacuated/backfilled with  $\text{N}_2$  (x 3) and capped with a septum. Then PhMe (300 mL) was added. To the stirring suspension was added phenylmagnesium bromide (3.00 M in  $\text{Et}_2\text{O}$ , 50.0 mL, 150 mmol, 1.00 eq.) and 3,4-dihydro-2H-pyran **5** (41.0 mL, 450 mmol, 3.00 eq.) sequentially at room temperature. Then the septum was replaced with a reflux condenser and the reaction was heated to  $110\text{ }^\circ\text{C}$  in an oil bath for 12 h. After cooled down to room temperature, the reaction was quenched with saturated  $\text{NH}_4\text{Cl}$  solution (150 mL). The aqueous layer was extracted with  $\text{Et}_2\text{O}$  (3 x 100 mL). The combined organic layers were washed with brine (300 mL), dried over anhydrous  $\text{MgSO}_4$ , filtered and concentrated by rotary evaporation. The residue was purified by FCC (Hex :  $\text{EtOAc}$  = 9 : 1 to 4 : 1) to afford alcohol **SI-1** (19.7 g, 81% yield) as pale yellow oil. All spectral data matched that reported in the literature.<sup>20</sup>

To a 1 L round bottom flask charged with alcohol **SI-1** (16.7 g, 100 mmol, 1.00 eq.) was added MeCN (400 mL). Copper iodide (0.95 g, 5.0 mmol, 0.050 eq.), bpy (0.78 g, 5.0 mmol, 0.050 eq.), TEMPO (0.78 g, 5.0 mmol, 0.050 eq.) and NMI (0.80 mL, 10 mmol, 0.10 eq.) were added sequentially to the solution at room temperature. The reaction was stirred at the same temperature for 9 h without capping, with color changed from dark red to green. Then the mixture was concentrated by rotary evaporation. The residue was filtered through a pad of silica and washed with 9 : 1 Hex :  $\text{EtOAc}$  (300 mL). The filtrate was concentrated by rotary evaporation to afford crude aldehyde **SI-2** (15.4 g, 92% yield), which was used directly in next reaction without further purification.

A flame-dried 1 L round bottom flask equipped with a stir bar was cooled under vacuum. After evacuated/backfilled with  $\text{N}_2$  (x 3) and capped with a septum, aldehyde **SI-2** (15.4 g, 95.0 mmol, 1.00 eq.) was added followed by THF (300 mL). To the stirring solution was added dibromomethane (8.00 mL, 114 mmol, 1.20 eq.) at room temperature. Then the solution was cooled to  $-78\text{ }^\circ\text{C}$  in a dry ice/acetone and *n*-butyllithium (2.50 M in hexanes, 40.0 mL, 100 mmol, 1.05 eq.) was added slowly over 5 minutes. The reaction was naturally warmed to room temperature over 16 h and quenched with saturated  $\text{NH}_4\text{Cl}$  solution (150 mL). The aqueous layer was extracted with  $\text{Et}_2\text{O}$  (3 x 100 mL). The combined organic layers were washed with brine (200 mL), dried over anhydrous  $\text{MgSO}_4$ , filtered and concentrated by rotary evaporation. The residue was purified by FCC (Hex :  $\text{EtOAc}$  = 30 : 1) to afford epoxide **6** (10.8 g, 65% yield) as pale yellow oil. All spectral data matched that reported in the literature.<sup>19</sup>

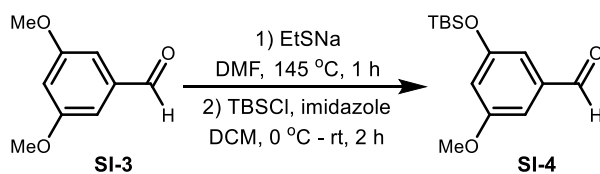

**3-((*tert*-Butyldimethylsilyl)oxy)-5-methoxybenzaldehyde (SI-4):** Demethylation was adapted from the literature procedure.<sup>21</sup> A flame-dried 1 L round bottom flask equipped with a stir bar was cooled under vacuum. After evacuated/backfilled with N<sub>2</sub> (x 3) and capped with a septum, ethanethiol (20.0 mL, 280 mmol, 3.50 eq.) was added followed by DMF (240 mL). To the stirring solution was added sodium hydride (9.60 g, 240 mmol, 3.00 eq.) at 0 °C in an ice/water bath. When hydrogen bubble evolution ceased (~ 15 min), a solution of 3,5-dimethoxybenzaldehyde **SI-3** (13.3 g, 80.0 mmol, 1.00 eq.) in DMF (40 mL) was added at the same temperature. Then the septum was replaced with a reflux condenser and the reaction was heated to 145 °C for 1 h. After cooled down to room temperature, brine (200 mL), formaldehyde (40% v/v in H<sub>2</sub>O, 40 mL), acetic acid (60 mL) were added sequentially. The mixture was extracted with EtOAc (3 x 150 mL). The combined organic layers were dried over anhydrous MgSO<sub>4</sub>, filtered and concentrated by rotary evaporation. The resulting crude phenol was used directly into next reaction without further purification.

A flame-dried 500 mL round bottom flask equipped with a stir bar was cooled under vacuum. After evacuated/backfilled with N<sub>2</sub> (x 3) and capped with a septum, above crude phenol (assuming 80 mmol, 1.0 eq.) was added followed by DCM (160 mL). To the stirring solution was added imidazole (8.12 g, 120 mmol, 1.50 eq.) and TBSCl (13.6 g, 90.0 mmol, 1.10 eq.) sequentially at 0 °C in an ice/water bath. Then ice bath was removed and the reaction was stirred at room temperature for 2 h and quenched with saturated NH<sub>4</sub>Cl solution (50 mL). The aqueous layer was extracted with DCM (3 x 50 mL). The organic layers were washed with brine (100 mL), dried over anhydrous MgSO<sub>4</sub>, filtered and concentrated by rotary evaporation. The residue was purified by FCC (Hex : EtOAc = 19 : 1) to afford aldehyde **SI-4** (10.7 g, 50 % yield for 2 steps) as pale yellow oil. All spectral data matched that reported in the literature.<sup>22</sup>

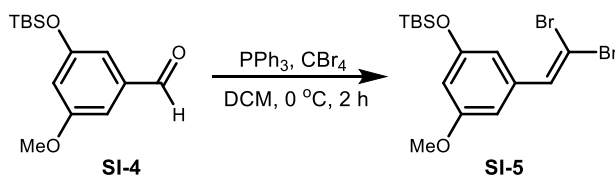

***tert*-Butyl(3-(2,2-dibromovinyl)-5-methoxyphenoxy)dimethylsilane (SI-5):** A flame-dried 500 mL round bottom flask equipped with a stir bar was cooled under vacuum. After evacuated/backfilled with N<sub>2</sub> (x 3) and capped with a septum, aldehyde **SI-4** (10.7 g, 40.0 mmol, 1.00 eq.) and tetrabromomethane (27 g, 80 mmol, 2.0 eq.) were added followed by DCM (135 mL). To the stirring solution was added triphenylphosphine (4 x 10.5 g, 160 mmol, 4.00 eq.) every 5 min at 0 °C in an ice/water bath. The mixture was stirred at the same temperature for 2 h and quenched with H<sub>2</sub>O (50 mL). The aqueous layer was extracted with DCM (3 x 50 mL). The combined organic layers were washed with brine (100 mL), dried over anhydrous MgSO<sub>4</sub>, filtered

and concentrated by rotary evaporation. The residue was purified by FCC (Hex : EtOAc = 19 : 1) to afford vinyl bromide **SI-5** (15.2 g, 91% yield) as colorless oil.

**<sup>1</sup>H NMR (400 MHz, CDCl<sub>3</sub>):** δ 7.39 (s, 1H), 6.68 (s, 1H), 6.65 (s, 1H), 6.39 (s, 1H) 3.78 (s, 3H), 0.98 (s, 9H), 0.21 (s, 6H).

**<sup>13</sup>C NMR (101 MHz, CDCl<sub>3</sub>):** δ 160.6, 156.8, 136.9, 112.7, 107.2, 106.8, 89.8, 55.5, 25.8, 18.3, -4.2. (Vinyl carbon attached to two bromine atoms was not detected).

**IR:** 2955 (m), 2885 (m), 1560 (s), 1461 (m), 1161 (s), 837 (s).

**HRMS (EI):** Calculated for C<sub>15</sub>H<sub>22</sub>Br<sub>2</sub>O<sub>2</sub>Si [M<sup>+</sup>]: 419.9756. Found: 419.9713.

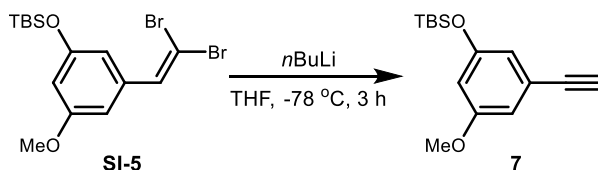

***tert*-Butyl(3-ethynyl-5-methoxyphenoxy)dimethylsilane (7):** A flame-dried 250 mL round bottom flask equipped with a stir bar was cooled under vacuum. After evacuated/backfilled with N<sub>2</sub> (x 3) and capped with a septum, vinyl bromide **SI-5** (15.2 g, 36.0 mmol, 1.00 eq.) was added followed by THF (120 mL). To the stirring solution was added *n*BuLi (2.40 M in hexanes, 37.5 mL, 90.0 mmol, 2.50 eq.) slowly (~ 5 min) at -78 °C in a dry ice/acetone bath. The reaction was stirred at the same temperature for 3 h and quenched with saturated NH<sub>4</sub>Cl solution (50 mL). After warmed to room temperature, the aqueous layer was extracted with Et<sub>2</sub>O (3 x 50 mL). The combined organic layers were washed with brine (100 mL), dried over anhydrous MgSO<sub>4</sub>, filtered and concentrated by rotary evaporation. The residue was purified by FCC (Hex : EtOAc = 19 : 1) to afford alkyne **7** (7.54 g, 80% yield) as pale yellow oil.

**<sup>1</sup>H NMR (400 MHz, CDCl<sub>3</sub>):** δ 6.65 (s, 1H), 6.59 (s, 1H), 6.41 (s, 1H), 3.77 (s, 3H), 3.02 (s, 1H), 0.98 (s, 9H), 0.20 (s, 6H).

**<sup>13</sup>C NMR (101 MHz, CDCl<sub>3</sub>):** δ 160.5, 156.7, 123.3, 116.7, 110.5, 108.2, 83.7, 76.8, 55.5, 25.8, 18.3, -4.3.

**IR:** 3293 (m), 2955 (m), 2858 (m), 1585 (s), 1462 (m), 1161 (s), 835 (s).

**HRMS (EI):** Calculated for C<sub>15</sub>H<sub>22</sub>O<sub>2</sub>Si [M<sup>+</sup>]: 262.1389. Found: 262.1362.

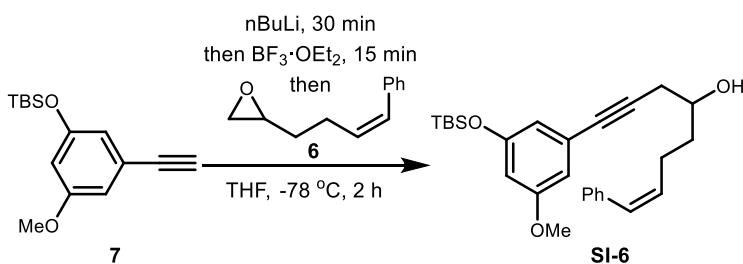

**(Z)-1-(3-((*tert*-Butyldimethylsilyloxy)-5-methoxyphenyl)-8-phenyloct-7-en-1-yn-4-ol (SI-6):** A flame-dried 100 mL round bottom flask equipped with a stir bar was cooled under vacuum. After evacuated/backfilled with N<sub>2</sub> (x 3) and capped with a septum, alkyne **7** (682 mg, 2.60 mmol, 1.20 eq.) was added followed by THF (13 mL). To the stirring solution was added *n*-butyllithium (2.28 M in hexanes, 1.14 mL, 2.60 mmol, 1.20 eq.) dropwise at -78 °C in a dry ice/acetone bath and the reaction was stirred for 30 min before boron trifluoride diethyl etherate (0.32 mL, 2.6 mmol, 1.2 eq.) was





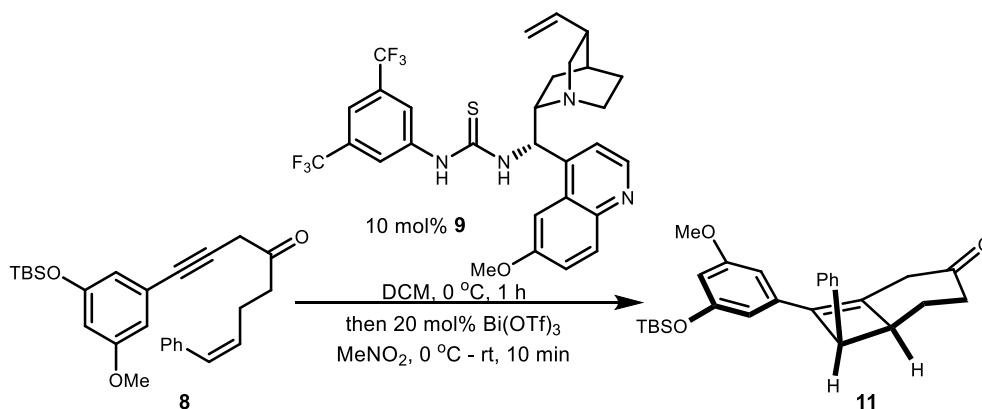

**(6*S*,7*S*)-8-(3-((*tert*-Butyldimethylsilyl)oxy)-5-methoxyphenyl)-7-phenylbicyclo[4.2.0]oct-1(8)-en-3-one (11):** A flame-dried 25 mL round bottom flask equipped with a stir bar was cooled under vacuum. After evacuated/backfilled with N<sub>2</sub> (x 3) and capped with a septum, ketone **8** (217 mg, 0.500 mmol, 1.00 eq.) was added followed by DCM (1 mL). To the stirring solution was added thiourea catalyst **9** (29.7 mg, 0.0500 mmol, 0.100 eq.) at 0 °C in an ice/water bath and the reaction was stirred for 1 h at the same temperature. Then the mixture was diluted with MeNO<sub>2</sub> (2.5 mL) and bismuth triflate (656 mg, 1.00 mmol, 0.200 eq.) was added also at 0 °C. After addition, the ice bath was immediately replaced with a room temperature water bath and the reaction was stirred vigorously for 10 min before it was quenched with saturated NH<sub>4</sub>Cl solution (2 mL). The aqueous layer was extracted with EtOAc (3 x 5 mL). The combined organic layers were washed with brine (10 mL), dried over anhydrous MgSO<sub>4</sub>, filtered and concentrated by rotary evaporation. The residue was purified by FCC (Hex : EtOAc = 15:1 to 9:1) to afford cyclobutene **11** (75 mg, 35% yield, >20:1 dr) as yellow solid. (Note: ~50 % of Cyclobutene decomposition product was observed left in -20 °C freezer for 5 days. It should be used directly after preparation.)

**<sup>1</sup>H NMR (600 MHz, CDCl<sub>3</sub>):** δ 7.26 – 7.22 (m, 2H), 7.18 (t, *J* = 6.9 Hz, 1H), 7.12 (d, *J* = 7.6 Hz, 2H), 6.42 (s, 1H), 6.27 (s, 1H), 6.25 (s, 1H), 4.43 (t, *J* = 3.9 Hz, 2H), 3.74 – 3.66 (m, 4H), 3.36 (d, *J* = 17.6 Hz, 1H), 3.20 – 3.11 (m, 1H), 2.51 – 2.35 (m, 1H), 1.64 – 1.51 (m, 1H), 1.21 (qd, *J* = 13.1, 4.3 Hz, 1H), 0.90 (s, 9H), 0.05 (s, 6H).

**<sup>13</sup>C NMR (126 MHz, CDCl<sub>3</sub>):** δ 207.6, 160.8, 156.9, 140.5, 139.7, 136.7, 135.6, 128.5, 128.2, 126.5, 110.9, 105.6, 105.2, 55.3, 47.8, 44.5, 42.3, 40.7, 25.8, 25.1, 18.3, -4.3, -4.4.

**IR:** 3025 (m), 2885 (m), 1718 (s), 1665 (w), 1587 (s), 1158 (s), 728 (s).

**HRMS (ESI):** Calculated for C<sub>27</sub>H<sub>35</sub>O<sub>3</sub>Si [M + H]<sup>+</sup>: 435.2350. Found: 435.2349.

**Optical rotation:** [α]<sub>D</sub><sup>20</sup>: -96.6 (c = 1.00, CHCl<sub>3</sub>) for an enantiomerically enriched sample of 98 : 2 er.

Racemic sample was obtained following the same procedure except for using 0.1 eq. Et<sub>3</sub>N instead of thiourea catalyst **9**. The enantiomeric purity was established by HPLC analysis using a chiral column (Chiralpak IA PG024, 22 °C, 0.5 mL/min, 99 : 1 Hexane : Isopropanol, 254 nm, *t*<sub>ma/or</sub> = 17.986 min, *t*<sub>minor</sub> = 13.555 min). Absolute stereochemistry was determined according to published literature.<sup>14</sup> Relative stereochemistry was determined by analysis of relevant NOE interactions (see Supporting Information Spectrums).

**Melting point:** 98 °C – 100 °C.

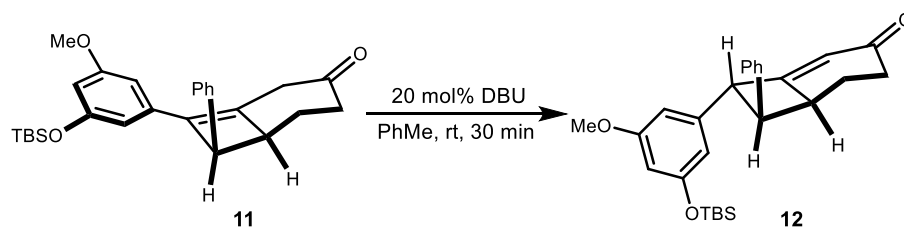

**(6*S*,7*R*,8*R*)-8-(3-((*tert*-Butyldimethylsilyl)oxy)-5-methoxyphenyl)-7-phenyl-**

**bicyclo[4.2.0]oct-1-en-3-one (**12**):** A flame-dried 4 mL vial equipped with a stir bar was cooled under vacuum. After evacuated/backfilled with N<sub>2</sub> (x 3) and capped with a septum, a solution of cyclobutene **11** (60 mg, 0.14 mmol, 1.0 eq.) in PhMe (1.5 mL) was added followed by DBU (3.7  $\mu$ L, 0.028, 0.20 eq.) at room temperature. The reaction was stirred at the same temperature for 30 min and quenched with saturated NH<sub>4</sub>Cl (1 mL). The aqueous layer was extracted with Et<sub>2</sub>O (3 x 1 mL). The combined organic layers were washed with brine (2 mL), dried over anhydrous MgSO<sub>4</sub>, filtered and concentrated by rotary evaporation. The residue was purified by FCC (Hex : EtOAc = 9 : 1) to afford enone **12** (60 mg, quant. yield, >20:1 dr) as 1 : 1 inseparable mixture with **11**.

**<sup>1</sup>H NMR (600 MHz, CDCl<sub>3</sub>):**  $\delta$  7.37 (t,  $J$  = 7.5 Hz, 2H), 7.31 – 7.25 (m, 3H), 6.46 (s, 1H), 6.38 (s, 1H), 6.32 (s, 1H), 6.12 (s, 1H), 4.48 (s, 1H), 3.88 (dd,  $J$  = 10.5, 3.2 Hz, 1H), 3.89 – 3.87 (m, 4H), 2.44 – 2.33 (m, 2H), 1.64 (dd,  $J$  = 12.7, 6.3 Hz, 1H), 1.53 – 1.41 (m, 1H), 0.99 (s, 9H), 0.21 (s, 6H).

**<sup>13</sup>C NMR (126 MHz, CDCl<sub>3</sub>):**  $\delta$  199.0, 172.5, 161.2, 157.4, 142.8, 139.4, 128.8, 128.0, 127.1, 122.3, 111.2, 105.8, 104.5, 55.5, 54.5, 49.9, 45.4, 37.6, 25.8, 25.6, 18.4, -4.2, -4.2.

**IR, HRMS and optical rotation** were not collected due to the compound is a mixture. Relative stereochemistry was determined by analysis of relevant NOE interactions (See Supporting Information Spectrums).

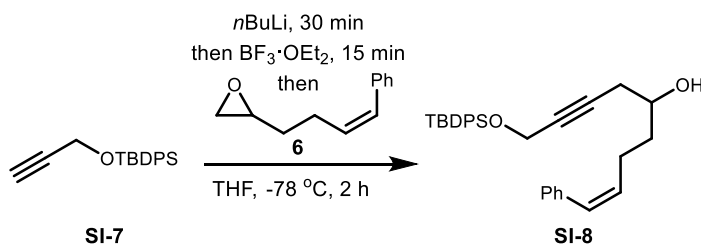

**(*Z*)-9-((*tert*-Butyldiphenylsilyl)oxy)-1-phenylnon-1-en-7-yn-5-ol (**SI-8**):** A flame-dried 250 mL round bottom flask equipped with a stir bar was cooled under vacuum. After backfilled with N<sub>2</sub>, *tert*-butyldiphenyl(prop-2-yn-1-yloxy)silane **SI-7** (17.7 g, 1.50 eq, 60.0 mmol.) was added. The flask was evacuated/backfilled with N<sub>2</sub> (x 3) and capped with a septum. Then THF (120 mL) was added. To the stirring solution was added *n*-butyllithium (2.5 M in hexane, 24 mL, 60 mmol, 1.5 eq.) dropwise at -78 °C in a dry ice/acetone bath and the reaction was stirred for 30 min before boron trifluoride diethyl etherate (7.4 mL, 60 mmol, 1.5 eq.) was added. After 15 min, a solution of epoxide **6** (6.77 g, 39.0 mmol, 1.0 eq.) in THF (40 mL) was added and the reaction was stirred for another 2 h at the same temperature. Then the reaction was warmed up to

room temperature and quenched with saturated  $\text{NH}_4\text{Cl}$  solution (50 mL). The aqueous layer was extracted with  $\text{Et}_2\text{O}$  (3 x 100 mL). The combined organic layers were washed with brine (250 mL), dried over anhydrous  $\text{MgSO}_4$ , filtered and concentrated by rotary evaporation. The residue was purified by FCC (Hex :  $\text{EtOAc}$  = 30 : 1 to 4 : 1) to afford alcohol **SI-8** (15 g, 82% yield) as colorless oil.

**$^1\text{H}$  NMR (600 MHz,  $\text{CDCl}_3$ ):**  $\delta$  7.71 (d,  $J$  = 6.7 Hz, 4H), 7.45 – 7.27 (m, 10H), 6.45 (d,  $J$  = 11.6 Hz, 1H), 5.64 (dt,  $J$  = 11.7, 7.3 Hz, 1H), 4.34 (s, 2H), 3.66 (h,  $J$  = 6.0 Hz, 1H), 2.50 – 2.33 (m, 4H), 2.26 (dd,  $J$  = 16.6, 6.7 Hz, 1H), 1.70 (d,  $J$  = 5.3 Hz, 1H), 1.61 (d,  $J$  = 7.5 Hz, 2H), 1.06 (s, 9H).

**$^{13}\text{C}$  NMR (101 MHz,  $\text{CDCl}_3$ ):**  $\delta$  137.6, 135.7, 133.4, 133.4, 132.1, 129.9, 129.6, 128.9, 128.3, 127.8, 127.8, 126.8, 81.8, 81.4, 69.6, 53.0, 36.4, 27.9, 26.9, 25.0, 19.3.

**IR (neat):** 3435 (br), 3012 (m), 2857 (m), 2362 (w), 1497 (m), 1111 (s)

**HRMS (EI):** Calculated for  $\text{C}_{27}\text{H}_{27}\text{O}_2\text{Si}$  [ $\text{M} - \text{C}_4\text{H}_9$ ] $^+$ : 411.1780. Found: 411.1776.

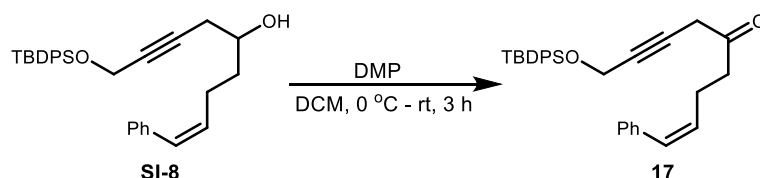

**(Z)-9-((tert-Butyldiphenylsilyl)oxy)-1-phenylnon-1-en-7-yn-5-one (17):** A 250 mL round bottom flask equipped with a stir bar was charged with alcohol **SI-8** (14.1 g, 30.0 mmol, 1.00 eq.). After evacuated/backfilled with  $\text{N}_2$  (x 3) and capped with a septum, DCM (150 mL) was added. To the stirring solution was added Dess-Martin periodinane (20.8 g, 45.0 mmol, 1.50 eq.) at 0 °C in an ice/water bath. Then ice bath was removed and the reaction was stirred for 3 h before quenched with 1 M  $\text{NaOH}$  solution (200 mL). The aqueous layer was extracted with  $\text{Et}_2\text{O}$  (3 x 150 mL). The combined organic layers were washed with brine (300 mL), dried over anhydrous  $\text{MgSO}_4$  and concentrated by rotary evaporation to afford crude ketone **17** (13.8 g, 98% yield), which was directly used to next reaction without further purification.

**$^1\text{H}$  NMR (600 MHz,  $\text{CDCl}_3$ ):**  $\delta$  7.71 (d,  $J$  = 6.6 Hz, 4H), 7.43 (t,  $J$  = 7.3 Hz, 2H), 7.39 (t,  $J$  = 7.2 Hz, 4H), 7.34 (t,  $J$  = 7.6 Hz, 2H), 7.27 (d,  $J$  = 7.4 Hz, 2H), 7.23 (t,  $J$  = 7.3 Hz, 1H), 6.46 (d,  $J$  = 11.6 Hz, 1H), 5.58 (dt,  $J$  = 11.6, 7.2 Hz, 1H), 4.36 (s, 2H), 3.19 (s, 2H), 2.68 (t,  $J$  = 7.3 Hz, 2H), 2.60 (q,  $J$  = 7.3 Hz, 2H), 1.07 (s, 9H).

**$^{13}\text{C}$  NMR (126 MHz,  $\text{CDCl}_3$ ):**  $\delta$  203.9, 137.3, 135.7, 133.3, 130.5, 130.2, 129.9, 128.8, 128.4, 127.8, 126.9, 83.1, 77.9, 53.0, 41.3, 34.3, 26.8, 22.8, 19.3.

**IR (neat):** 3070 (m), 2857 (m), 1725 (s), 1427 (m), 1112 (s)

**HRMS (EI):** Calculated for  $\text{C}_{27}\text{H}_{25}\text{O}_2\text{Si}$  [ $\text{M} - \text{C}_4\text{H}_9$ ] $^+$ : 409.1618. Found: 409.1622

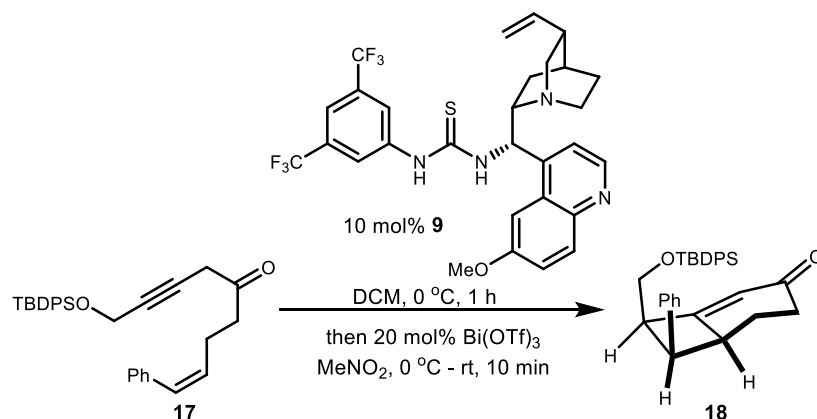

**(6*S*,7*R*,8*R*)-8-(((*tert*-Butyldiphenylsilyl)oxy)methyl)-7-phenylbicyclo[4.2.0]oct-1-en-3-one (18):** A flame-dried 250 mL round bottom flask equipped with a stir bar was cooled under vacuum. After evacuated/backfilled with N<sub>2</sub> (x 3) and capped with a septum, ketone **17** (4.66 g, 10.0 mmol, 1.00 eq.) was added followed by DCM (20 mL). To the stirring solution was added thiourea catalyst **9** (594 mg, 1.00 mmol, 0.100 eq.) at 0 °C in an ice/water bath and stirred for 1 h at the same temperature. Then the reaction was diluted with MeNO<sub>2</sub> (50 mL) and bismuth triflate (1.32 g, 2.00 mmol, 0.200 eq.) was added also at 0 °C. After addition, the ice bath was immediately transferred into a room temperature water bath and the reaction was vigorously stirred for 10 min before it was quenched with saturated NH<sub>4</sub>Cl solution (40 mL). The aqueous layer was extracted with EtOAc (3 x 50 mL). The combined organic layers were washed with brine (100 mL), dried over anhydrous MgSO<sub>4</sub>, filtered and concentrated by rotary evaporation. The residue was purified by FCC (Hex : EtOAc = 9:1 to 4:1) to afford bicyclic enone **18** (3.03 g, 65% yield, >20:1 dr) as yellow oil.

**<sup>1</sup>H NMR (600 MHz, CDCl<sub>3</sub>):** δ 7.57 (d, *J* = 7.4 Hz, 2H), 7.42 (t, *J* = 7.0 Hz, 1H), 7.37 - 7.27 (d, *J* = 7.1 Hz, 10H), 7.19 – 7.15 (m, 2H), 5.87 (s, 1H), 3.95 (d, *J* = 5.3 Hz, 2H), 3.87 (dd, *J* = 10.8, 5.2 Hz, 1H), 3.68 (dd, *J* = 10.4, 6.9 Hz, 1H), 3.62 – 3.50 (m, 1H), 2.42 (dd, *J* = 13.7, 4.5 Hz, 2H), 1.92 (ddt, *J* = 18.5, 12.9, 5.8 Hz, 1H), 1.70 – 1.60 (m, 1H), 0.93 (s, 9H).

**<sup>13</sup>C NMR (126 MHz, CDCl<sub>3</sub>):** δ 199.0, 174.3, 137.0, 135.6, 135.5, 133.4, 133.2, 129.9, 129.8, 129.7, 128.2, 127.8, 127.7, 127.0, 117.3, 60.3, 50.2, 44.6, 43.8, 37.6, 26.8, 24.3, 19.1.

**IR:** 3070 (w), 2857 (m), 1659 (s), 1427 (m), 1025 (s)

**HRMS (ESI):** Calculated for C<sub>31</sub>H<sub>42</sub>O<sub>2</sub>SiNa [M + Na]<sup>+</sup>: 489.2220. Found: 489.2219.

**Optical rotation:** [α]<sub>D</sub><sup>20</sup>: +61.7 (c = 1.00, CHCl<sub>3</sub>) for an enantiomerically enriched sample of 95.5 : 4.5 er.

Racemic sample was obtained following the same procedure except for using 0.1 eq. Et<sub>3</sub>N instead of thiourea catalyst **9**. The enantiomeric purity was established by HPLC analysis using a chiral column (Chiralpak IA PG024, 22 °C, 0.5 mL/min, 98 : 2 Hexane : Isopropanol, 254 nm, *t*<sub>major</sub> = 23.799 min, *t*<sub>minor</sub> = 16.252 min). Absolute stereochemistry was determined according to published literature.<sup>14</sup> Relative stereochemistry was determined by analysis of relevant NOE interactions (see Supporting Information Spectrums).

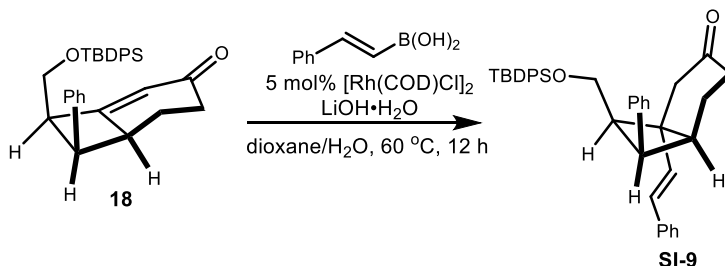

**(1*R*,6*S*,7*R*,8*R*)-8-(((*tert*-Butyldiphenylsilyl)oxy)methyl)-7-phenyl-1-((*E*)-styryl)bicyclo[4.2.0] octan-3-one (SI-9):** A flame-dried 100 mL round bottom flask equipped with a stir bar was cooled under vacuum. After backfilled with N<sub>2</sub>, enone **18** (4.6 g, 10 mmol, 1.0 eq.), *E*-phenylethenylboronic acid (1.8 g, 12 mmol, 1.2 eq.) and lithium hydroxide monohydrate (1.2 g, 30 mmol, 3.0 eq.) were added. The flask was then evacuated/backfilled N<sub>2</sub> (x 3), capped with a stopper and transferred into glovebox. Chloro(1,5-cyclooctadiene)rhodium(I) dimer (0.12 g, 0.25 mmol, 0.025 eq.) was added in glovebox. Then the flask was moved out and the stopper was quickly replaced with a septum. Dioxane (50 mL) and degassed H<sub>2</sub>O (5 mL) were added. The reaction was stirred at 60 °C in an oil bath for 12 h. After cooled down to room temperature, it was quenched with 1 M HCl solution (30 mL). The aqueous layer was extracted with Et<sub>2</sub>O (3 x 30 mL). The combined organic layers were washed with H<sub>2</sub>O (30 mL), saturated NaHCO<sub>3</sub> (30 mL) and brine (50 mL) successively, dried over anhydrous MgSO<sub>4</sub>, filtered and concentrated by rotary evaporation. The crude ketone **SI-9** was used directly into next reaction without further purification. A small amount of product (~50 mg) was purified by FCC (Hex : EtOAc = 20:1 to 4:1) for characterization.

**<sup>1</sup>H NMR (600 MHz, CDCl<sub>3</sub>):** δ 7.62 (dd, *J* = 23.6, 7.2 Hz, 4H), 7.47 – 7.16 (m, 14H), 7.12 (d, *J* = 6.9 Hz, 2H), δ 6.53 (d, *J* = 16.1 Hz, 1H), 6.49 (d, *J* = 16.1 Hz, 1H), 4.14 (q, *J* = 9.9, 9.0 Hz, 2H), 3.88 (dd, *J* = 10.9, 5.1 Hz, 1H), 3.24 – 3.14 (m, 1H), 3.12 (d, *J* = 15.5 Hz, 1H), 2.99 (q, *J* = 10.4, 9.7 Hz, 1H), 2.60 (d, *J* = 15.4 Hz, 1H), 2.40 (d, *J* = 18.4 Hz, 1H), 2.16 – 2.05 (m, 1H), 1.97 (q, *J* = 13.7, 12.1 Hz, 1H), 1.87 – 1.78 (m, 1H), 1.03 (s, 9H).

**<sup>13</sup>C NMR (101 MHz, CDCl<sub>3</sub>):** δ 212.2, 138.9, 138.8, 137.2, 135.7, 133.6, 133.5, 129.9, 129.8, 129.4, 128.7, 128.3, 127.8, 127.8, 127.4, 126.8, 126.4, 126.3, 62.3, 48.6, 42.7, 42.2, 41.3, 40.6, 37.6, 26.9, 22.0, 19.2.

**IR:** 3069 (w), 2857 (m), 1714 (s), 1427 (m), 1027 (s)

**HRMS (EI):** Calculated for C<sub>35</sub>H<sub>33</sub>O<sub>2</sub>Si [M – C<sub>4</sub>H<sub>9</sub>]<sup>+</sup>: 513.2244. Found: 513.2246.

**Optical rotation:** [α]<sub>D</sub><sup>20</sup>: +44.0 (c = 1.00, CHCl<sub>3</sub>) for an enantiomerically enriched sample of 95.5 : 4.5 er.

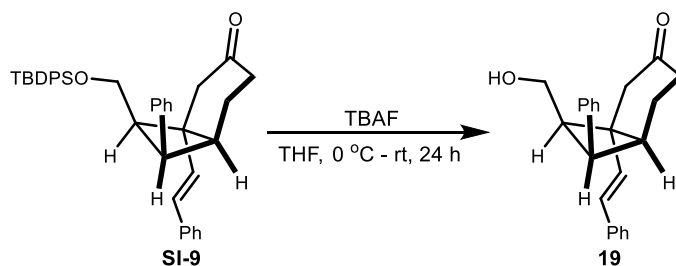

**(1*R*,6*S*,7*R*,8*R*)-8-(Hydroxymethyl)-7-phenyl-1-((*E*)-styryl)bicyclo[4.2.0]octan-3-one (19):** A 250 mL round bottom flask equipped with a stir bar was charged with above crude ketone **SI-9** (assuming 30 mmol for three combined batches, 1.0 eq.). After evacuated/backfilled with N<sub>2</sub> (x 3) and capped with a septum, THF (150 mL) was added followed by TBAF (1.0 M in THF, 36 mL, 36 mmol, 1.2 eq) at 0 °C in an ice bath. Then ice bath was removed and the mixture was stirred at room temperature for 24 h. The reaction was quenched with saturated NH<sub>4</sub>Cl solution (100 mL). The aqueous layer was extracted with Et<sub>2</sub>O (3 x 50 mL). The combined organic layers were washed with brine (100 mL), dried over anhydrous MgSO<sub>4</sub>, filtered and concentrated by rotary evaporation. The residue was purified by FCC (Hex : EtOAc = 4 : 1 to 2 : 1) to afford alcohol **19** (8 g, 73% yield for 2 steps, >20 : 1 dr) as yellow oil (with ~ 10% inseparable impurity).

**<sup>1</sup>H NMR (600 MHz, CDCl<sub>3</sub>):** δ 7.43 – 7.20 (m, 10H), 6.49 (d, *J* = 16.0 Hz, 1H), 6.45 (d, *J* = 15.9 Hz, 1H), 4.21 (t, *J* = 10.0 Hz, 1H), 4.05 (t, *J* = 10.2 Hz, 1H), 3.94 (dd, *J* = 10.6, 6.1 Hz, 1H), 3.13 (m, 2H), 3.03 – 2.90 (m, 1H), 2.53 (d, *J* = 15.2 Hz, 1H), 2.42 (d, *J* = 17.7 Hz, 1H), 2.12 (dq, *J* = 43.4, 14.5, 14.1 Hz, 2H), 1.93 – 1.84 (m, 1H).

**<sup>13</sup>C NMR (126 MHz, CDCl<sub>3</sub>):** δ 212.0, 139.0, 138.3, 137.0, 129.3, 128.7, 128.6, 127.5, 126.7, 126.6, 126.4, 61.1, 48.6, 42.3, 41.9, 41.8, 40.3, 37.6, 22.0.

**IR:** 3411 (br), 2937 (m), 1709 (s), 1494 (m), 1076 (s)

**HRMS (ESI):** Calculated for C<sub>23</sub>H<sub>24</sub>O<sub>2</sub>Na [M+Na]<sup>+</sup>: 355.1669. Found: 355.1671.

**Optical rotation:** [α]<sub>D</sub><sup>20</sup>: +10.6 (c = 1.00, CHCl<sub>3</sub>) for an enantiomerically enriched sample of 95.5 : 4.5 er.

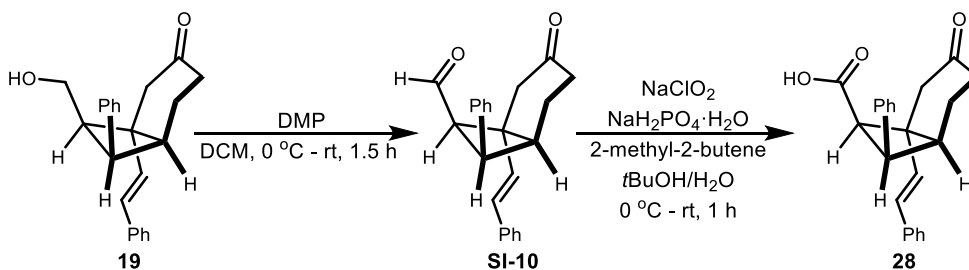

**(1*S*,6*R*,7*R*,8*R*)-4-Oxo-8-phenyl-6-((*E*)-styryl)bicyclo[4.2.0]octane-7-carboxylic acid (28):** A 100 mL round bottom flask equipped with a stir bar was charged with alcohol **19** (1.66 g, assuming 5.00 mmol, 1.00 eq., ~10 % impurity). After evacuated/backfilled with N<sub>2</sub> (x 3) and capped with a septum, DCM (50 mL) was added. To the stirring solution was added Dess-Martine Periodinane (2.90 g, 6.25 mmol, 1.25 eq) at 0 °C in an ice/water bath. Then ice bath was removed and the mixture was stirred at room temperature for 1.5 h. The reaction was quenched with 1M NaOH solution (30 mL). The aqueous layer was extracted with Et<sub>2</sub>O (3 x 30 mL). The combined organic layers were washed with brine (50 mL), dried over anhydrous MgSO<sub>4</sub>, filtered and concentrated by rotary evaporation. The crude aldehyde **SI-10** was used directly into next reaction without further purification.

(Note: Aldehyde decomposed upon silica gel purification.)

A 250 mL round bottom flask equipped with a stir bar was charged with above aldehyde **SI-10** (assuming 5 mmol, 1 eq.). Then *t*BuOH (50 mL) and 2-methyl-2-butene (10 mL) were added. The mixture was cooled to 0 °C in an ice/water bath and a solution of

sodium chloride (2.26 g, 25.0 mmol, 5.00 eq.) and sodium phosphate mono-basic monohydrate (3.45 g, 25.0 mmol, 5.00 eq.) in H<sub>2</sub>O (25 mL) was added in one portion via syringe. Then ice bath was removed and the reaction was stirred at room temperature for 1 h. Brine (50 mL) was added to the solution. The aqueous layer was extracted with EtOAc (3 x 30 mL). The combined organic layers were dried over anhydrous MgSO<sub>4</sub>, filtered and concentrated by rotary evaporation. The crude acid **28** was used directly into all following reactions without further purification. A small amount of product (~50 mg) was purified by FCC (Hex : EtOAc = 2 : 1) for characterization.

**<sup>1</sup>H NMR (500 MHz, CDCl<sub>3</sub>)** δ 7.42 (d, *J* = 7.5 Hz, 2H), 7.36 (t, *J* = 7.7 Hz, 4H), 7.28 (dd, *J* = 6.4, 3.6 Hz, 2H), 7.21 (d, *J* = 7.5 Hz, 2H), 6.53 (d, *J* = 16.1 Hz, 1H), 6.45 (d, *J* = 16.1 Hz, 1H), 4.42 (t, *J* = 10.2 Hz, 1H), 3.91 (d, *J* = 10.7 Hz, 1H), 3.25 (d, *J* = 15.8 Hz, 1H), 3.08 (q, *J* = 10.2 Hz, 1H), 2.84 (d, *J* = 15.8 Hz, 1H), 2.35 (d, *J* = 18.1 Hz, 1H), 2.10 (ddd, *J* = 18.4, 14.1, 5.0 Hz, 1H), 1.94 (qd, *J* = 14.2, 3.8 Hz, 1H), 1.88 – 1.79 (m, 1H).

**<sup>13</sup>C NMR (126 MHz, CDCl<sub>3</sub>)** δ 211.3, 177.1, 138.2, 136.6, 136.5, 128.8, 128.5, 128.3, 128.1, 127.9, 126.7, 126.6, 49.4, 43.7, 42.8, 41.6, 41.1, 37.2, 21.2.

**IR:** 3173 (br), 3025 (m), 2938 (m), 1698 (s), 1601 (w), 1225 (m), 731 (s).

**HRMS:** Calculated for C<sub>23</sub>H<sub>22</sub>O<sub>3</sub>Na [M+Na]<sup>+</sup>: 369.1461. Found: 369.1462.

**Optical rotation:** [α]<sub>D</sub><sup>20</sup>: +22.8 (c = 1.00, CHCl<sub>3</sub>) for an enantiomerically enriched sample of 95.5 : 4.5 er.

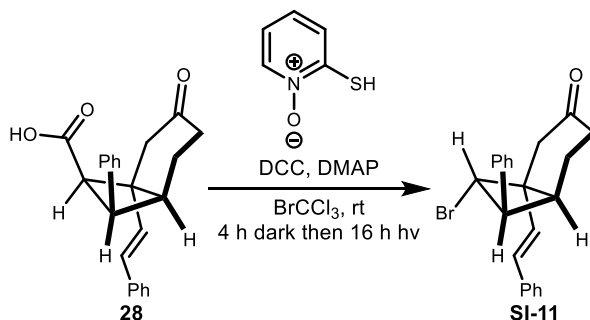

**(1R,6S,7S,8S)-8-Bromo-7-phenyl-1-((E)-styryl)bicyclo[4.2.0]octan-3-one (SI-11):**

A flame-dried 10 mL round bottom flask equipped with a stir bar was cooled under vacuum. After evacuated/backfilled with N<sub>2</sub> (x 3), wrapped with aluminum foil, and capped with a septum, a solution of crude acid **28** (assuming 0.4 mmol, 1 eq.) in bromotrichloromethane (4 mL) was added. Then 2-Mercaptopyridine *N*-oxide (76 mg, 0.60 mmol, 1.5 eq.), DCC (165 mg, 0.800 mmol, 2.00 eq.) and DMAP (49 mg, 0.40 mmol, 1.0 eq.) were added sequentially to the solution at room temperature. After 4 h, the aluminum foil was removed and the reaction was stirred for another 12 h in the presence of hood light. Then the mixture was filtered through a pad of Celite. The filtrate was concentrated by rotary evaporation and purified by FCC (Hex : EtOAc = 19 : 1 to 9 : 1) to afford bromide **SI-11** (76 mg, 55% for three steps, >20 : 1 dr) as pale yellow oil.

**<sup>1</sup>H NMR (600 MHz, CDCl<sub>3</sub>)**: δ 7.49 (d, *J* = 7.4 Hz, 2H), 7.38 (dt, *J* = 11.7, 7.6 Hz, 4H), 7.28 (t, *J* = 7.2 Hz, 2H), 7.22 (d, *J* = 7.6 Hz, 2H), 6.71 (d, *J* = 16.1 Hz, 1H), 6.53 (d, *J* = 16.1 Hz, 1H), 4.83 (d, *J* = 10.2 Hz, 1H), 4.24 (t, *J* = 10.3 Hz, 1H), 3.15 (ddd, *J*



= 10.3, 7.9, 6.0 Hz, 1H), 2.72 (d,  $J$  = 16.4 Hz, 1H), 2.68 (d,  $J$  = 16.4 Hz, 1H), 2.24 – 2.14 (m, 2H), 1.87 (dq,  $J$  = 12.8, 6.1 Hz, 1H), 1.78 (dq,  $J$  = 14.3, 7.7 Hz, 1H).

**$^{13}\text{C}$  NMR (126 MHz,  $\text{CDCl}_3$ ):**  $\delta$  210.2, 137.1, 136.8, 133.3, 129.2, 128.9, 128.8, 128.0, 127.0, 126.7, 126.6, 54.8, 48.8, 47.2, 45.8, 41.5, 37.4, 21.5.

**IR:** 3081 (m), 2919 (m), 1713 (s), 1600 (w), 1448 (m), 966 (m).

**HRMS (ESI):** Calculated for  $\text{C}_{22}\text{H}_{22}\text{OBr}$   $[\text{M} + \text{H}]^+$ : 381.0849. Found: 381.0841.

**Optical rotation:**  $[\alpha]_{\text{D}}^{20}$ : -43.8 ( $c$  = 1.00,  $\text{CHCl}_3$ ) for an enantiomerically enriched sample of 95.5 : 4.5 er. Relative stereochemistry was determined by analysis of relevant NOE interactions (see Supporting Information Spectrums).

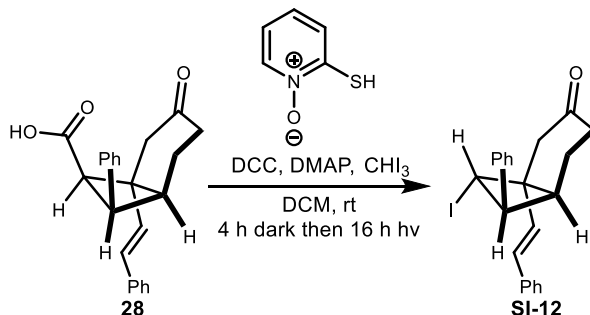

**(1R,6S,7S,8S)-8-Iodo-7-phenyl-1-((E)-styryl)bicyclo[4.2.0]octan-3-one (SI-12):** A flame-dried 10 mL round bottom flask equipped with a stir bar was cooled under vacuum. After evacuated/backfilled with  $\text{N}_2$  (x 3), wrapped with aluminum foil, and capped with a septum, a solution of crude acid **28** (assuming 0.4 mmol, 1 eq.) in DCM (4 mL) was added. Then Iodoform (315 mg, 0.800 mmol, 2.00 eq.), 2-mercaptopyridine *N*-oxide (76 mg, 0.60 mmol, 1.5 eq.), DCC (165 mg, 0.800 mmol, 2.00 eq.) and DMAP (49 mg, 0.40 mmol, 1.0 eq.) were added sequentially to the solution at room temperature. After 4 h, the aluminum foil was removed and the reaction was stirred for another 12 h in the presence of hood light. Then the mixture was filtered through a pad of Celite. The filtrate was concentrated by rotary evaporation and purified by FCC (Hex : EtOAc = 19 : 1 to 9 : 1) to afford iodide **SI-12** (72 mg, 46% for three steps, >20 : 1 dr) as pale yellow oil.

(Note: Product was not very stable at room temperature. It should be used directly after preparation.)

**$^1\text{H}$  NMR (600 MHz,  $\text{CDCl}_3$ ):**  $\delta$  7.51 (d,  $J$  = 7.5 Hz, 2H), 7.38 (q,  $J$  = 7.5 Hz, 4H), 7.29 (t,  $J$  = 7.3 Hz, 2H), 7.20 (d,  $J$  = 7.4 Hz, 2H), 6.62 (d,  $J$  = 16.1 Hz, 1H), 6.49 (d,  $J$  = 16.0 Hz, 1H), 4.89 (d,  $J$  = 10.6 Hz, 1H), 4.27 (t,  $J$  = 10.4 Hz, 1H), 3.10 (q,  $J$  = 8.2, 7.8 Hz, 1H), 2.63 (s, 2H), 2.20 (dtd,  $J$  = 32.0, 19.0, 16.0, 7.2 Hz, 2H), 1.82 (tq,  $J$  = 14.9, 7.7, 7.1 Hz, 2H).

**$^{13}\text{C}$  NMR (126 MHz,  $\text{CDCl}_3$ ):**  $\delta$  210.1, 137.1, 136.7, 136.5, 128.8, 128.8, 128.6, 128.0, 127.0, 126.7, 126.5, 48.9, 46.7, 44.8, 43.1, 37.3, 32.2, 21.6.

**IR:** 3082 (m), 2929 (m), 1710 (s), 1601 (w), 1448 (m), 965 (m).

**HRMS (ESI):** Calculated for  $\text{C}_{22}\text{H}_{22}\text{OI}$   $[\text{M} + \text{H}]^+$ : 381.0710. Found: 381.0707.

**Optical rotation:**  $[\alpha]_{\text{D}}^{20}$ : -76.0 ( $c$  = 1.00,  $\text{CHCl}_3$ ) for an enantiomerically enriched sample of 95.5 : 4.5 er. Relative stereochemistry was determined by analysis of relevant NOE interactions (see Supporting Information Spectrums).

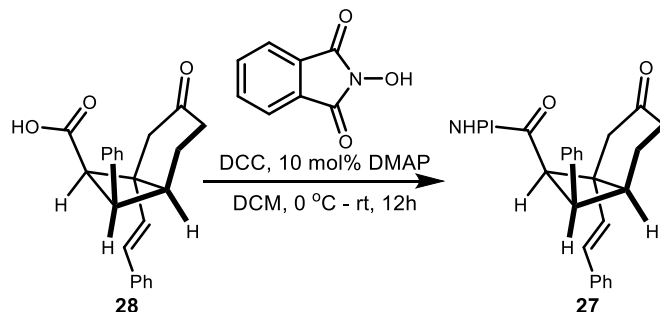

**1,3-Dioxoisindolin-2-yl (1*S*,6*R*,7*R*,8*R*)-4-oxo-8-phenyl-6-((*E*)-styryl)bicyclo-[4.2.0]octane-7-carboxylate (**27**):** A flame-dried 10 mL round bottom flask equipped with a stir bar was cooled under vacuum. After evacuated/backfilled with N<sub>2</sub> (x 3) and capped with a septum, a solution of crude acid **28** (assuming 0.4 mmol, 1 eq.) in DCM (2 mL) was added. Then NHPI (33 mg, 0.20 mmol, 1.0 eq.), DCC (41 mg, 1.0 mmol, 1.0 eq.) and DMAP (2.5 mg, 0.020 mmol, 0.10 eq.) were sequentially at 0 °C in an ice/water bath. After addition, the ice bath was removed and the reaction was stirred at room temperature for 12 h. The mixture was filtered through a pad of Celite. The filtrate was concentrated by rotary evaporation. The residue was purified by FCC (Hex : EtOAc = 9 : 1 to 4 : 1) to afford redox active ester **27** (61 mg, 68 yield for 3 steps, with ~10% inseparable impurity).

(Note: Various ratio of diastereomers of redox-active ester were observed after silica gel purification for different batches but would result in the same yield for following cross coupling.)

**<sup>1</sup>H NMR (600 MHz, CDCl<sub>3</sub>):** For 2:1 dr mixture: Aromatic region overlaps for major and minor. δ 7.86 (dd, *J* = 5.5, 3.0 Hz, 2H), 7.76 (dd, *J* = 6.1, 3.0 Hz, 2H), 7.55 (d, *J* = 7.6 Hz, 1H), 7.49 – 7.15 (m, 9H), 6.77 (d, *J* = 16.1 Hz, 0.66H, major), 6.66 (d, *J* = 16.1 Hz, 0.66H, major), 6.60 (d, *J* = 16.0 Hz, 0.33H, minor), 6.51 (d, *J* = 16.1 Hz, 0.33H, minor), 4.55 (t, *J* = 9.8 Hz, 0.33H, minor), 4.38 (t, *J* = 10.1 Hz, 0.66H, major), 4.21 (d, *J* = 10.1 Hz, 0.33H, minor), 3.86 (d, *J* = 10.6 Hz, 0.66H, major), 3.14 (m, 1H), 3.10 – 3.02 (m, 0.33H, minor), 2.96 (d, *J* = 16.5 Hz, 0.66H, major), 2.77 (m, 1H), 2.40 (d, *J* = 16.1 Hz, 0.33H, minor), 2.31 – 1.84 (m, 4H).

**<sup>13</sup>C NMR (101 MHz, CDCl<sub>3</sub>):** For 2:1 dr mixture: Aromatic region is hard to differentiate for major and minor. δ 210.2 (major), 210.0 (minor), 168.7 (minor), 167.6 (major), 137.7, 137.0, 136.5, 136.3, 135.4, 134.9, 134.8, 130.8, 130.4, 129.0, 128.8, 128.7, 128.5, 128.1, 128.0, 127.9, 127.0, 126.9, 126.8, 126.7, 126.7, 124.1, 49.0 (major), 48.7 (major), 47.7 (minor), 44.2 (major), 43.7 (minor), 43.2 (minor), 42.0 (minor), 40.3 (minor), 39.4 (major), 38.4 (major), 37.4 (minor), 37.1 (major), 21.8 (major), 21.5 (minor).

**HRMS:** Calculated for C<sub>31</sub>H<sub>25</sub>O<sub>5</sub>NNa [M + Na]<sup>+</sup>: 514.1625. Found: 514.1625.

**Melting point, IR, optical rotation** were not collected due to product is a mixture.

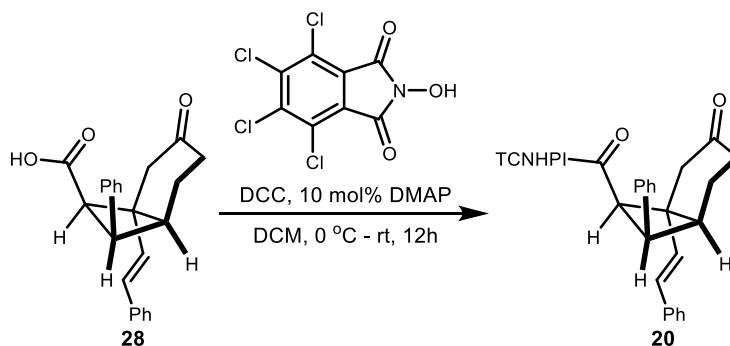

**4,5,6,7-Tetrachloro-1,3-dioxoisindolin-2-yl (1*S*,6*R*,7*R*,8*R*)-4-oxo-8-phenyl-6-((*E*)-styryl)bicyclo[4.2.0]octane-7-carboxylate (**20**):** A flame-dried 50 mL round bottom flask equipped with a stir bar was cooled under vacuum. After evacuated/backfilled with N<sub>2</sub> (x 3) and capped with a septum, a solution of crude acid **28** (assuming 0.4 mmol, 1 eq.) in DCM (50 mL) was added. Then TCNHPI (1.65 g, 5.50 mmol, 1.10 eq), DCC (1.24 g, 6.00 mmol, 1.20 eq) and DMAP (61 mg, 0.50 mmol, 0.10 eq) were added sequentially at 0 °C. After addition, ice bath was removed and the reaction was stirred at room temperature for 12 h. The mixture was filtered through a pad of Celite. The filtrate was concentrated by rotary evaporation. The residue was purified by FCC (Hex : EtOAc = 9 : 1 to pure DCM) to afford redox active ester **20** (1.99 g, 72% yield for 3 steps) as pale yellow solid.

(Note: Various ratio of diastereomers of redox-active ester were observed after silica gel purification for different batches but would result in the same yield for following cross coupling.)

**<sup>1</sup>H NMR (600 MHz, CDCl<sub>3</sub>):** For >20:1 dr product: δ 7.43 – 7.37 (m, 4H), 7.34 (t, *J* = 7.6 Hz, 2H), 7.28 – 7.24 (m, 2H), 7.20 (d, *J* = 7.7 Hz, 2H), 6.60 (d, *J* = 16.0 Hz, 1H), 6.50 (d, *J* = 16.0 Hz, 1H), 4.57 (t, *J* = 9.8 Hz, 1H), 4.21 (d, *J* = 10.0 Hz, 1H), 3.11 (d, *J* = 15.4 Hz, 1H), 3.07 (q, *J* = 9.6 Hz, 1H), 2.76 (d, *J* = 15.5 Hz, 1H), 2.41 (dd, *J* = 14.3, 2.2 Hz, 1H), 2.13 – 2.07 (m, 2H), 2.06 – 1.98 (m, 1H).

**<sup>13</sup>C NMR (126 MHz, CDCl<sub>3</sub>):** For >20:1 dr product: δ 209.7, 168.2, 141.2, 136.8, 136.2, 135.1, 130.6, 128.8, 128.8, 128.6, 128.2, 127.9, 126.8, 126.7, 47.7, 43.7, 43.3, 42.0, 40.4, 37.4, 21.5.

**IR:** 3026 (w), 2951 (w), 1812 (w), 1787 (m), 1747 (s), 1716 (m), 1038 (m).

**HRMS (ESI):** Calculated for C<sub>31</sub>H<sub>21</sub>O<sub>5</sub>NCl<sub>4</sub>Na [M+Na]<sup>+</sup>: 650.0066. Found: 650.0066.

**Optical rotation:** [α]<sub>D</sub><sup>20</sup>: -4.4 (c = 1.00, CHCl<sub>3</sub>) for an enantiomerically enriched sample of 95.5 : 4.5 er.

**Melting point:** 173 °C – 174 °C (Decompose).

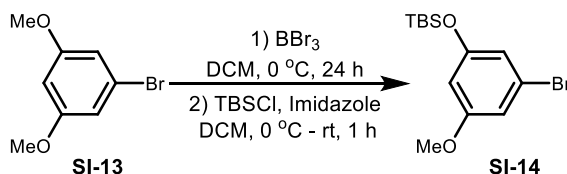

**(3-Bromo-5-methoxyphenoxy)(*tert*-butyl)dimethylsilane (SI-14):** A flame-dried 200 mL round bottom flask equipped with a stir bar was cooled under vacuum. After backfilled with N<sub>2</sub>, 1-bromo-3,5-dimethoxybenzene **SI-13** (13 g, 60 mmol, 1.0 eq.) was added. The flask was evacuated/backfilled with N<sub>2</sub> (x 3) and capped with a septum.

DCM (60 mL) was then added. To the stirring solution was added boron tribromide (1.0 M in DCM, 20 mL, 20 mmol, 0.33 eq.) at 0 °C. The reaction was stirred at the same temperature for 24 h (cryocooler was used to keep the temperature) and quenched with MeOH (5 mL) dropwise. After concentrated by rotary evaporation, the residue was purified by FCC (Hex : EtOAc = 9 : 1 to 4 : 1) to afford phenol as white solid.

A flame-dried 500 mL round bottom flask equipped with a stir bar was cooled under vacuum. After backfilled with N<sub>2</sub>, above crude phenol (assuming 60 mmol, 1.0 eq.) was added. The flask was evacuated/backfilled with N<sub>2</sub> (x 3) and capped with a septum and DCM (200 mL) was added. To the stirring solution was added imidazole (6.1 g, 90 mmol, 1.5 eq.) and TBSCl (9.0 g, 60 mmol, 1.0 eq.) at 0 °C sequentially in an ice/water bath. Then ice bath was removed and the mixture was stirred at room temperature for 1 h. The reaction was quenched with saturated NH<sub>4</sub>Cl solution (100 mL). The aqueous layer was extracted with DCM (3 x 50 mL). The combined organic layers were washed with brine (100 mL), dried over anhydrous MgSO<sub>4</sub> and concentrated by rotary evaporation. The residue was purified by FCC (Hex : EtOAc = 30 : 1) to afford silyl ether **SI-14** (13.3 g, 70% yield for 2 steps) as colorless oil. All spectral data matched that reported in the literature.<sup>23</sup>

**<sup>1</sup>H NMR (400 MHz, CDCl<sub>3</sub>):** δ 6.65 (s, 1H), 6.59 (s, 1H), 6.30 (s, 1H), 3.73 (s, 3H), 0.95 (s, 9H), 0.18 (s, 6H).

**<sup>13</sup>C NMR (101 MHz, CDCl<sub>3</sub>):** δ 161.2, 157.4, 122.7, 116.3, 110.5, 105.7, 55.6, 25.9, 25.7, 18.3, -4.3.

**IR:** 2956 (m), 1595 (s), 1569 (m), 1442 (m), 1195 (s).

**HRMS (ESI):** Calculated for C<sub>13</sub>H<sub>22</sub>O<sub>2</sub>BrSi [M+H]<sup>+</sup>: 317.0567. Found: 317.0569.

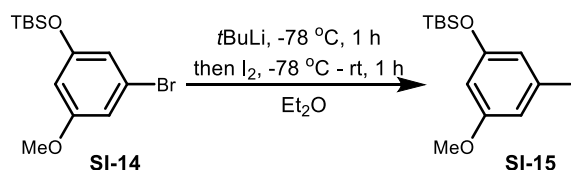

***tert*-Butyl(3-iodo-5-methoxyphenoxy)dimethylsilane (SI-15):** A flame-dried 50 mL round bottom flask equipped with a stir bar was cooled under vacuum. After evacuated/backfilled with N<sub>2</sub> (x 3) and capped with a septum, bromide **SI-14** (317 mg, 1.00 mmol, 1.00 eq.) was added followed by Et<sub>2</sub>O (10 mL). To the stirring solution was added *t*-butyllithium solution (1.7 M in pentane, 2.2 mmol, 2.2 eq.) dropwise at -78 °C in a dry ice/acetone bath. After stirred at the same temperature for 1 h, a solution of iodine (760 mg, 3.00 mmol, 3.00 eq.) in Et<sub>2</sub>O (3 mL) was added dropwise. Then the dry ice bath was removed. The reaction was naturally warmed to room temperature for 1 h and quenched with saturated Na<sub>2</sub>S<sub>2</sub>O<sub>3</sub> solution (5 mL). The aqueous layer was extracted with Et<sub>2</sub>O (3 x 5 mL). The combined organic layers were washed with brine (10 mL), dried over anhydrous MgSO<sub>4</sub>, filtered and concentrated by rotary evaporation. The residue was purified by FCC (Hex : Et<sub>2</sub>O = 100 : 1) to afford iodide **SI-15** (246 mg, 67%) as colorless oil.

**<sup>1</sup>H NMR (400 MHz, CDCl<sub>3</sub>):** δ 6.86 (s, 1H), 6.81 (s, 1H), 6.34 (s, 1H), 3.74 (s, 3H), 0.97 (s, 9H), 0.20 (s, 5H).

**<sup>13</sup>C NMR (101 MHz, CDCl<sub>3</sub>):** δ 161.1, 157.3, 122.4, 116.4, 106.6, 93.9, 55.6, 25.8, 18.3, -4.3.

IR: 2955 (m), 2858 (m), 1589 (s), 1562 (m), 1442 (m), 1195 (s).

HRMS (ESI): Calculated for C<sub>13</sub>H<sub>22</sub>O<sub>2</sub>Si [M+H]<sup>+</sup>: 365.0428. Found: 365.0430.

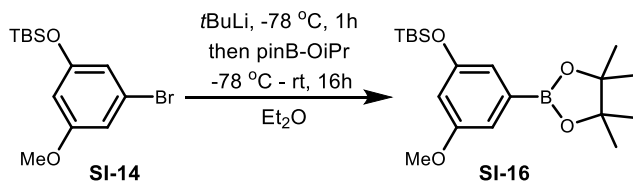

**tert-Butyl(3-methoxy-5-(4,4,5,5-tetramethyl-1,3,2-dioxaborolan-2-yl)phenoxy)dimethylsilane (SI-16):** A flame-dried 50 mL round bottom flask equipped with a stir bar was cooled under vacuum. After evacuated/backfilled with N<sub>2</sub> (x 3) and capped with a septum, bromide SI-14 (634 mg, 2.00 mmol, 1.00 eq.) was added followed by Et<sub>2</sub>O (20 mL). To the stirring solution was added *t*-butyllithium solution (1.1 M in pentane, 4.4 mmol, 2.2 eq.) dropwise at -78 °C in a dry ice/acetone bath. After stirred at the same temperature for 1 h, pinB-OiPr (0.82 mL, 4.0 mmol, 2.0 eq.) was added dropwise. The reaction was naturally warmed to room temperature over 16 h and quenched with saturated NH<sub>4</sub>Cl solution (10 mL). The aqueous layer was extracted with Et<sub>2</sub>O (3 x 10 mL). The combined organic layers were washed with brine (20 mL), dried over anhydrous MgSO<sub>4</sub>, filtered and concentrated by rotary evaporation. The residue was purified by FCC (Hex : Et<sub>2</sub>O = 100 : 1) to afford boronic ester SI-16 (352 mg, 48%) as colorless oil.

<sup>1</sup>H NMR (400 MHz, CDCl<sub>3</sub>): δ 6.94 (s, 1H), 6.89 (s, 1H), 6.50 (s, 1H), 3.80 (s, 3H), 1.33 (s, 12H), 0.98 (s, 9H), 0.20 (s, 6H).

<sup>13</sup>C NMR (101 MHz, CDCl<sub>3</sub>): δ 160.3, 156.5, 119.2, 111.7, 110.1, 83.9, 55.5, 25.0, 18.3, -4.3. (Carbon attached to boron atom was not detected due to quadrupolar relaxation).

IR: 2977 (m), 2858 (m), 1580 (s), 1421 (s), 833 (s)

HRMS: Calculated for C<sub>19</sub>H<sub>34</sub>O<sub>4</sub>BSi [M+H]<sup>+</sup>: 365.2314. Found: 365.2316.

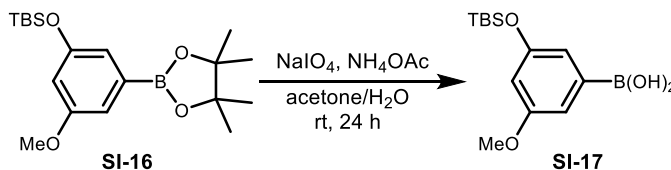

**(3-((tert-Butyldimethylsilyl)oxy)-5-methoxyphenyl)boronic acid (SI-17):** A 25 mL round bottom flask equipped with a stir bar was charged with boronic ester SI-16 (291 mg, 0.800 mmol, 1.00 eq.). Then acetone (4 mL) and H<sub>2</sub>O (4 mL) were added. To the stirring solution was added sodium periodate (600 mg, 2.80 mmol, 3.50 eq.) and ammonium acetate (215 mg, 2.80 mmol, 3.50 eq.) at room temperature. The suspension was stirred at the same temperature for 24 h and diluted with H<sub>2</sub>O (10 mL). The aqueous layer was extracted with Et<sub>2</sub>O (3 x 10 mL). The combined organic layer was washed with brine (15 mL), dried over anhydrous MgSO<sub>4</sub>, filtered and concentrated by rotary evaporation. The residue was purified by FCC (Hex : EtOAc) = 3 : 1 to afford boronic acid SI-17 (160 mg, 71% yield) as white solid.

<sup>1</sup>H NMR (400 MHz, CDCl<sub>3</sub>): δ 7.35 (s, 1H), 7.30 (s, 1H), 6.65 (s, 1H), 3.89 (s, 3H), 1.04 (s, 9H), 0.28 (s, 6H).

**$^{13}\text{C}$  NMR (101 MHz,  $\text{CDCl}_3$ ):**  $\delta$  160.6, 156.8, 119.5, 113.2, 111.2, 55.4, 25.9, 18.4, -4.1. (Carbon attached to boron atom was not detected due to quadrupolar relaxation).

**IR:** 3471 (br), 2954 (m), 1584 (m), 1447 (s), 1332 (s), 1193 (s), 832 (s).

**HRMS:** Calculated for  $\text{C}_{13}\text{H}_{22}\text{O}_4\text{BSi}$   $[\text{M}-\text{H}]^+$ : 281.1386. Found: 281.1381.

**Melting point:** 135  $^\circ\text{C}$  – 137  $^\circ\text{C}$ .

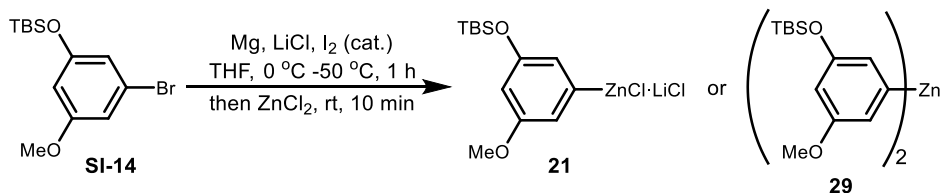

A flame-dried 15 mL round bottom flask equipped with a stir bar was cooled under vacuum. After backfilled with  $\text{N}_2$  and capped with a septum, the flask was transferred into glovebox and magnesium (364 mg, 15.0 mmol, 1.50 eq), lithium chloride (528 mg, 12.5 mmol, 1.25 eq) and iodine (1 small piece,  $\sim 0.05$  eq.) were added. Then the flask was moved out and THF (5 mL) was added. To the stirring suspension was added bromide **SI-14** (3.17 g, 10.0 mmol, 1.00 eq) dropwise via syringe at 0  $^\circ\text{C}$  in an ice/water bath. Then the ice bath was removed and the reaction was stirred at room temperature until yellow color disappeared ( $\sim 10$  min). Upon initiation, the septum was quickly replaced with a stopper and the mixture was heated to 50  $^\circ\text{C}$  for 1 h. After cooled down to room temperature, the Grignard reagent was titrated according to Knochel's procedure.<sup>24</sup> (Usually from 0.9 M – 1.0 M)

**(3-((*tert*-Butyldimethylsilyl)oxy)-5-methoxyphenyl)zinc(II) bromide lithium chloride complex (**21**):** A flame-dried 20 mL vial equipped with a stir bar was cooled under vacuum. After backfilled with  $\text{N}_2$  and capped with a septum, the vial was transferred into glovebox and  $\text{ZnCl}_2$  (912 mg, 6.69 mmol, 1.00 eq. based on Grignard) was added. Then the vial was moved out and THF (7.6 mL) was added followed by addition of above Grignard reagent (0.956 M in THF, 3.00 mL, 6.69 mmol, 1.00 eq.) dropwise via syringe at room temperature. After 10 min, the solution became homogenous and the Zinc reagent **21** (cal. 0.25 M) was used directly into next reaction without further titration.

**Bis(3-((*tert*-butyldimethylsilyl)oxy)-5-methoxyphenyl)zinc (**29**):** A flame-dried 20 mL vial equipped with a stir bar was cooled under vacuum. After backfilled with  $\text{N}_2$  and capped with a septum, the vial was transferred into glovebox and  $\text{ZnCl}_2$  (182 mg, 1.34 mmol, 0.500 eq. based on Grignard) was added. Then the vial was moved out and THF (5 mL) was added followed by addition of above Grignard reagent (0.890 M in THF, 3.00 mL, 2.67 mmol, 1.00 eq.) dropwise via syringe at room temperature. After 10 min, the solution became homogenous and the Zinc reagent **29** (cal. 0.33 M) was used directly into next reaction without further titration.



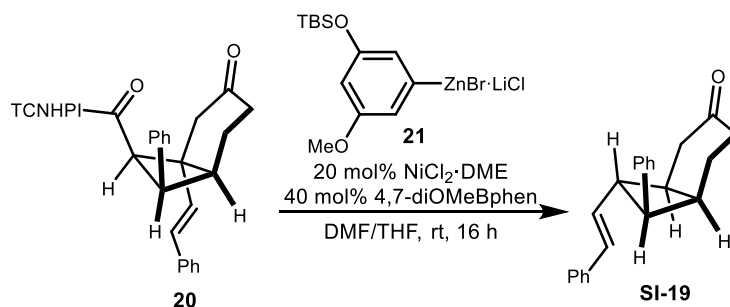

**(1S,6R,7R)-7-phenyl-8-((E)-styryl)bicyclo[4.2.0]octan-3-one (SI-19):** A flame-dried 4 mL vial equipped with a stir bar was cooled under vacuum. After backfilled with N<sub>2</sub> and capped with a septum, the vial was transferred into glovebox and with redox active ester **20** (16 mg, 0.025 mmol, 1.0 eq), NiCl<sub>2</sub>·DME (1.1 mg, 0.0050 mmol, 0.20 eq.), 4,7-diMeOBPhen (2.4 mg, 0.010 mmol, 0.40 eq.) in glovebox. After moved out, DMF (0.2 mL) was added at room temperature. After stirred for 5 min, freshly made zinc reagent (0.25 M, 0.30 mL, 0.075 mmol, 3.0 eq.) was added dropwise via syringe. The mixture was stirred at the same temperature for 16 h. The reaction was quenched with 1M HCl solution (1 mL). The aqueous layer was extracted with Et<sub>2</sub>O (3 x 1 mL). The combined organic layers were sequentially washed with H<sub>2</sub>O (2 mL), saturated NaHCO<sub>3</sub> solution (2 mL), brine (2 mL), dried over anhydrous MgSO<sub>4</sub> and concentrated by rotary evaporation. The residue was semi-purified by FCC (Hex : EtOAc = 9 : 1 to 4 : 1) to afford styryl migration product **SI-19** (28% yield, determined by <sup>1</sup>H-NMR using CH<sub>2</sub>Br<sub>2</sub> as internal standard, >20 : 1 dr) as yellow oil. The product was further purified by prep-TLC (Hex : EtOAc = 3 : 1) for characterization (with ~5% inseparable impurity).

**<sup>1</sup>H NMR (600 MHz, CDCl<sub>3</sub>):** δ 7.38 – 7.12 (m, 10H), 6.48 (d, *J* = 15.8 Hz, 1H), 6.36 (dd, *J* = 15.8, 7.1 Hz, 1H), 3.69 (t, *J* = 9.2 Hz, 1H), 3.21 (q, *J* = 8.9 Hz, 1H), 2.91 (p, *J* = 8.3 Hz, 1H), 2.79 (ddt, *J* = 11.4, 8.5, 3.3 Hz, 1H), 2.57 (dd, *J* = 16.8, 7.8 Hz, 1H), 2.45 (dd, *J* = 16.8, 3.1 Hz, 1H), 2.23 (dtd, *J* = 27.8, 16.6, 14.2, 5.2 Hz, 2H), 1.81 (dq, *J* = 11.3, 5.8 Hz, 1H), 1.72 (dq, *J* = 11.3, 5.8 Hz, 1H).

**<sup>13</sup>C NMR (101 MHz, CDCl<sub>3</sub>):** δ 212.9, 140.4, 137.2, 131.7, 130.0, 128.7, 128.5, 127.5, 127.1, 126.3, 126.3, 47.7, 44.8, 41.9, 38.6, 36.8, 34.4, 23.2.

**IR:** 3024 (w), 2932 (m), 1739 (m), 1711 (s), 1600 (m), 749 (s)

**HRMS (EI):** Calculated for C<sub>22</sub>H<sub>22</sub>O [M]<sup>+</sup>: 302.1665. Found: 302.1669.

**Optical rotation:** [ $\alpha$ ]<sub>D</sub><sup>20</sup>: -132 (c = 0.10, CHCl<sub>3</sub>) for an enantiomerically enriched sample of 95.5 : 4.5 er. Relative stereochemistry was determined by analysis of relevant NOE interactions (see Supporting Information Spectrums).

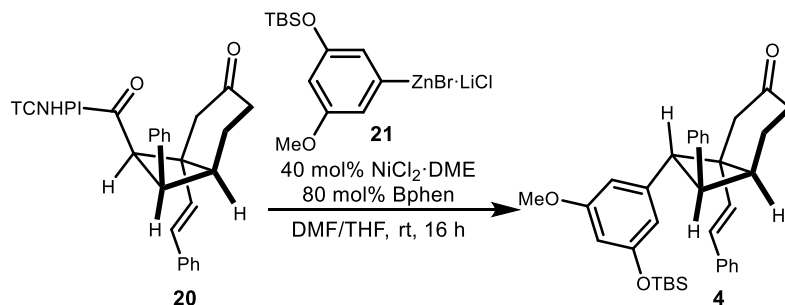



**(1*R*,6*S*,7*R*,8*R*)-8-(3-((*tert*-Butyldimethylsilyl)oxy)-5-methoxyphenyl)-7-phenyl -1-((*E*)-styryl)bicyclo[4.2.0]octan-3-one (4):** A flame-dried 25 mL test tube equipped with a stir bar was cooled under vacuum. After backfilled with N<sub>2</sub> and capped with a septum, the test tube was transferred into glovebox and charged with redox active ester **20** (315 mg, 0.500 mmol, 1.00 eq), NiCl<sub>2</sub>·DME (44 mg, 0.20 mmol, 0.40 eq.), BPhen (133 mg, 0.400 mmol, 0.800 eq.) in glovebox. After moved out, DMF (4 mL) was added at room temperature. After stirred for 5 min, freshly made zinc reagent (0.25 M, 6.0 mL, 1.5 mmol, 3.0 eq.) was added dropwise via syringe. The mixture was stirred at the same temperature for 16 h. The reaction was quenched with 1M HCl solution (10 mL) and vacuum filtered through a filter paper. The aqueous layer of filtrate was extracted with Et<sub>2</sub>O (3 x 10 mL). The combined organic layers were sequentially washed with H<sub>2</sub>O (20 mL), saturated NaHCO<sub>3</sub> solution (20 mL), brine (20 mL), dried over anhydrous MgSO<sub>4</sub> and concentrated by rotary evaporation. The residue was purified by FCC (Hex : EtOAc = 9 : 1 to 4 : 1) to afford decarboxylative cross coupling product **4** (40% yield, determined by <sup>1</sup>H-NMR using CH<sub>2</sub>Br<sub>2</sub> as internal standard, >20 : 1 dr) as yellow oil with inseparable impurity (~20% – 30%).

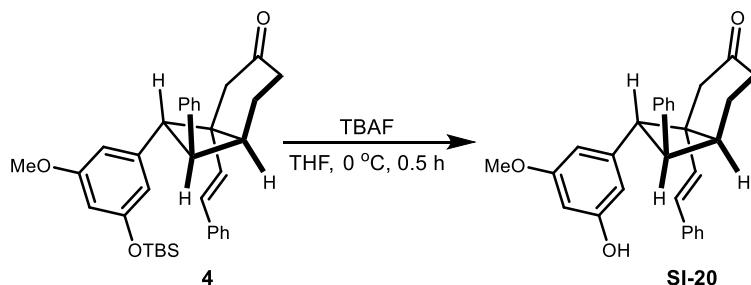

**Optical rotation:**  $[\alpha]_{\text{D}}^{20}$  : -18.8 ( $c = 1.00$ ,  $\text{CHCl}_3$ ) for an enantiomerically enriched sample of 95.5 : 4.5 er. Relative stereochemistry was determined by analysis of relevant NOE interactions (see Supporting Information Spectrums).

**Melting point:** 78 °C – 81 °C.

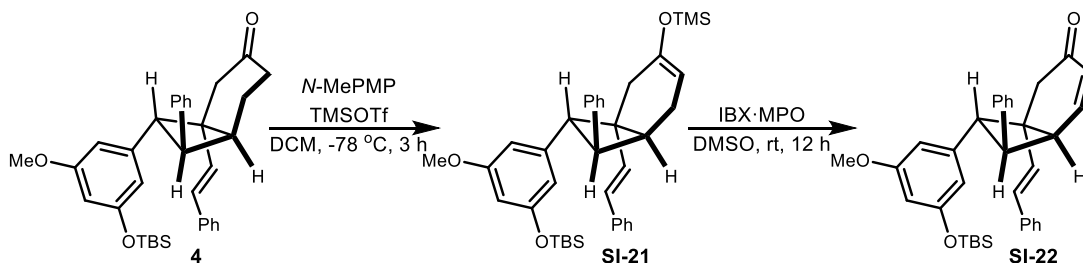

**(1*R*,6*S*,7*R*,8*R*)-8-(3-((*tert*-Butyldimethylsilyl)oxy)-5-methoxyphenyl)-7-phenyl-1-((*E*)-styryl)bicyclo[4.2.0]oct-4-en-3-one (SI-22):** A flame-dried 50 mL round bottom flask equipped with a stir bar was cooled under vacuum. After evacuated/backfilled with  $\text{N}_2$  (x 3) and capped with a septum, ketone **2** (2 mmol based on  $^1\text{H}$ -NMR using  $\text{CH}_2\text{Br}_2$  as internal standard, 1 eq.) and *N*-MePMP (0.73 mL, 4.0 mmol, 2.0 eq.) were added followed by DCM (20 mL) at room temperature. Then the reaction was cooled down to -78 °C in a dry ice/acetone bath and TMSOTf (0.54 mL, 3.0 mmol, 1.5 eq.) was added dropwise. The reaction was stirred at the same temperature for 3 h and quenched with saturated  $\text{NaHCO}_3$  solution (10 mL). After warmed to room temperature, the aqueous layer was extracted with DCM (3 x 10 mL). The combined organic layers were washed with brine (20 mL), dried over anhydrous  $\text{MgSO}_4$ , filtered and concentrated by rotary evaporation. The crude silylether **SI-21** (>20 : 1 rr) was used directly into next reaction without further purification.

(Note: Silylether went back to ketone upon silica gel or basic  $\text{Al}_2\text{O}_3$  purification.)

[IBX·MPO]: To a 25 mL round bottom flask charged with IBX (1.68 g, 6.00 mmol, 3.00 eq.) and MPO (0.75 g, 6.0 mmol, 3.0 eq.) was added DMSO (15 mL). The mixture was stirred at room temperature for 30 min until all solids had dissolved to afford IBX·MPO solution.

[Oxidation]: Another 50 mL round bottom flask equipped with a stir bar was charged with above silylether **SI-21** (assuming 2 mmol, 1 eq.). After evacuated/backfilled with  $\text{N}_2$  (x 3) and capped with a septum, DMSO (5 mL) was added followed by the IBX·MPO solution via syringe. The reaction was stirred at room temperature for 12 h and quenched with saturated  $\text{NaHCO}_3$  (20 mL) slowly in an ice/water bath. The aqueous layer was extracted with  $\text{Et}_2\text{O}$  (3 x 15 mL). The combined organic layers were washed with brine (20 mL), dried over anhydrous  $\text{MgSO}_4$  and filtered through a pad of Celite. The filtrate was concentrated by rotary evaporation and purified by FCC (Hex :  $\text{EtOAc} = 9 : 1$  to  $4 : 1$ ) to afford enone **SI-22** (850 mg, 80% yield for two steps) as yellow oil.

**$^1\text{H}$  NMR (600 MHz,  $\text{CDCl}_3$ ):**  $\delta$  7.79 – 6.88 (m, 10H), 6.58 (dd,  $J = 10.3, 4.0$  Hz, 1H), 6.53 (d,  $J = 16.2$  Hz, 1H), 6.30 (s, 1H), 6.24 (s, 1H), 6.20 (d,  $J = 10.0$  Hz, 1H), 6.19 (d,  $J = 16.2$  Hz, 1H), 4.36 (t,  $J = 10.6$  Hz, 1H), 3.95 (d,  $J = 11.5$  Hz, 1H), 3.67 (s, 3H), 3.61 (dd,  $J = 10.0, 3.9$  Hz, 1H), 2.79 (d,  $J = 17.5$  Hz, 1H), 2.57 (d,  $J = 17.5$  Hz, 1H), 0.90 (s, 9H), 0.08 (s, 3H), 0.07 (s, 3H).

**<sup>13</sup>C NMR (126 MHz, CDCl<sub>3</sub>):** δ 198.1, 160.7, 156.9, 149.1, 139.7, 137.5, 137.1, 132.1, 130.1, 129.1, 128.7, 128.6, 128.5, 128.5, 127.8, 127.6, 127.2, 127.0, 126.4, 126.4, 112.3, 106.9, 104.8, 55.3, 49.0, 45.1, 44.6, 43.7, 41.8, 25.8, 18.3, -4.3, -4.4.

**IR:** 3060 (w), 2930 (m), 1713 (s), 1591 (s), 1196 (s), 839 (s).

**HRMS (ESI):** Calculated for C<sub>35</sub>H<sub>41</sub>O<sub>3</sub>Si [M+H]<sup>+</sup>: 537.2819. Found: 537.2818.

**Optical rotation:** [α]<sub>D</sub><sup>20</sup>: -114.0 (c = 0.20, CHCl<sub>3</sub>) for an enantiomerically enriched sample of 95.5 : 4.5 er.

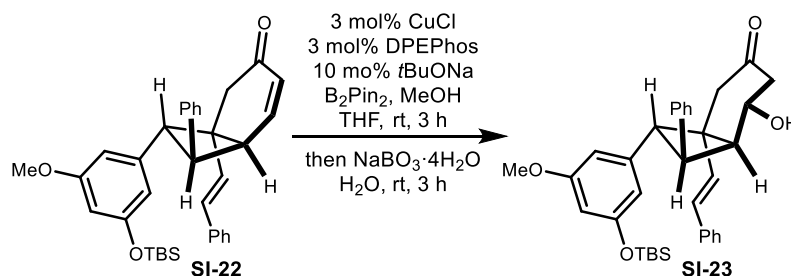

**(1S,5S,6S,7S,8R)-8-(3-((*tert*-Butyldimethylsilyl)oxy)-5-methoxyphenyl)-5-hydroxy-7-phenyl-1-((*E*)-styryl)bicyclo[4.2.0]octan-3-one (SI-23):**

[Cu pre-catalyst]: A flame-dried 10 mL round bottom flask equipped with a stir bar was cooled under vacuum. After backfilled with N<sub>2</sub> and capped with a septum, the flask was transferred into glovebox and charged with copper(I) chloride (4.5 mg, 0.045 mmol, 0.030 eq.), DPEPhos (24 mg, 0.045 mmol, 0.030 eq.) and sodium *tert*-butoxide (14 mg, 0.15 mmol, 0.10 eq.). Then the flask was moved out and THF (3 mL) was added. The mixture was stirred at room temperature for 0.5 h to afford (DPEPhos)Cu-*Ot*Bu pre-catalyst solution.

[Conjugate addition and oxidation]: Another flame-dried 50 mL round bottom flask equipped with a stir bar was cooled under vacuum. After backfilled with N<sub>2</sub> and capped with a septum, enone **SI-22** (800 mg, 1.50 mmol, 1.00 eq.) and bis(pinacolato)diboron (570 g, 2.25 mmol, 1.50 eq.) were added followed by THF (12 mL). To the stirring solution was added (DPEPhos)Cu-*Ot*Bu solution and methanol (0.12 mL, 3.0 mmol, 2.0 eq.) via syringe at room temperature. After stirred for 3 h at the same temperature, the solution was diluted with H<sub>2</sub>O (15 mL) and sodium perborate tetrahydrate (1.15 g, 7.50 mmol, 5.00 eq.) was added. After another 3 h, the aqueous layer was extracted with EtOAc (3 x 10 mL). The combined organic layers were washed with brine (20 mL), dried over anhydrous MgSO<sub>4</sub>, filtered and concentrated by rotary evaporation. The residue was purified by FCC (Hex : EtOAc = 3 : 1) to afford β-hydroxyl ketone **SI-23** (740 mg, 89% yield) as pale yellow oil.

**<sup>1</sup>H NMR (600 MHz, CDCl<sub>3</sub>):** δ 7.33 (t, *J* = 7.5 Hz, 2H), 7.27 – 7.14 (m, 8H), 6.46 (d, *J* = 16.2 Hz, 1H), 6.28 (s, 1H), 6.24 (s, 1H), 6.22 (s, 1H), 6.16 (d, *J* = 16.2 Hz, 1H), 4.35 (dq, *J* = 6.4, 3.3 Hz, 1H), 4.31 (t, *J* = 10.6 Hz, 1H), 3.85 (d, *J* = 11.4 Hz, 1H), 3.67 (s, 3H), 3.01 (dd, *J* = 9.6, 5.9 Hz, 1H), 2.85 (d, *J* = 16.5 Hz, 1H), 2.78 (d, *J* = 16.5 Hz, 1H), 2.51 (dd, *J* = 18.1, 3.8 Hz, 1H), 2.37 (dd, *J* = 18.0, 7.1 Hz, 1H), 0.89 (s, 9H), 0.08 (s, 3H), 0.07 (s, 3H).

**<sup>13</sup>C NMR (126 MHz, CDCl<sub>3</sub>):** δ 209.5, 160.8, 157.0, 140.6, 138.4, 137.1, 133.1, 129.0, 128.9, 128.7, 128.7, 128.6, 127.5, 127.3, 127.0, 126.9, 126.6, 126.4, 111.9, 106.6, 104.7, 66.9, 55.4, 51.7, 49.2, 47.4, 45.3, 44.1, 39.7, 25.8, 18.3, -4.3, -4.4.

**IR:** 3436 (br), 3058 (w), 2929 (m), 1710 (s), 1591 (s), 1196 (s), 840 (s).

**HRMS (ESI):** Calculated for C<sub>35</sub>H<sub>43</sub>O<sub>4</sub>Si [M+H]<sup>+</sup>: 555.2925. Found: 555.2925.

**Optical rotation:** [ $\alpha$ ]<sub>D</sub><sup>20</sup>: -49.5 (c = 0.20, CHCl<sub>3</sub>) for an enantiomerically enriched sample of 95.5 : 4.5 er.

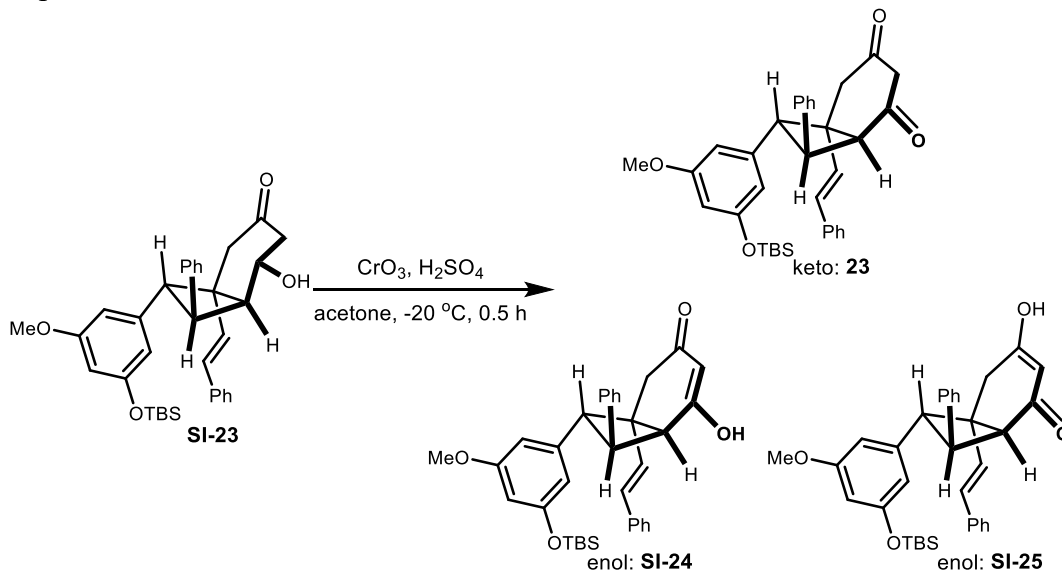

**(1*S*,6*S*,7*R*,8*S*)-7-(3-((*tert*-Butyldimethylsilyl)oxy)-5-methoxyphenyl)-8-phenyl-6-((*E*)-styryl)bicyclo[4.2.0]octane-2,4-dione (keto **23**):** A 100 mL round bottom flask equipped with a stir bar was charged with  $\beta$ -hydroxyl ketone **SI-23** (660 mg, 1.20 mmol, 1.00 eq.). The flask was evacuated and backfilled with N<sub>2</sub> (3x) and capped with septum. Acetone (24 mL) was added and the flask was cooled to -20 °C (cryocooler). Jones' reagent (2.5 M, 1.4 mL, 3.0 eq.) was then added dropwise via syringe. The reaction was stirred at the same temperature for 0.5 h and quenched with saturated NaHCO<sub>3</sub> solution (20 mL) slowly. Then brine (20 mL) was added and the aqueous layer was extracted with EtOAc (3 x 30 mL). The combined organic layers were dried over anhydrous MgSO<sub>4</sub>, filtered and concentrated by rotary evaporation. The residue was purified by FCC (Hex : EtOAc = 1 : 3) to afford diketone **23** (454 mg, 69% yield) as 1:2:1 (keto : enol : enol) tautomers.

<sup>1</sup>H-NMR and <sup>13</sup>C-NMR are reported as a mixture of tautomers.

**<sup>1</sup>H NMR (500 MHz, CDCl<sub>3</sub>):**  $\delta$  7.56 – 7.01 (m, 10H), 6.54 (m, 1H), 6.41 – 6.11 (m, 4H), 5.67 (m, 0.66H), 4.53 (t, *J* = 11.1 Hz, 0.29H), 4.29 (t, *J* = 10.9 Hz, 0.69H), 4.14 – 3.95 (m, 1H), 3.84 (d, *J* = 10.8 Hz, 0.29H), 3.85 – 3.63 (m, 3H), 3.56 (t, *J* = 10.4 Hz, 0.85H), 3.29 (d, *J* = 19.9 Hz, 0.34H), 3.16 – 2.96 (m, 0.58H), 2.78 – 2.62 (m, 1H), 2.52 (m, 0.76H), 0.94 (m, 9H), 0.12 (m, 6H).

**<sup>13</sup>C NMR (126 MHz, CDCl<sub>3</sub>):**  $\delta$  205.4, 204.6, 161.0, 160.7, 157.2, 156.9, 139.8, 139.6, 137.9, 137.6, 137.0, 136.5, 131.7, 130.5, 129.8, 129.4, 129.3, 128.9, 128.7, 128.7, 128.4, 128.2, 128.0, 127.7, 127.3, 127.3, 126.8, 126.5, 126.5, 112.2, 111.9, 107.0, 106.7, 106.6, 105.1, 104.7, 77.4, 77.2, 76.9, 55.8, 55.4, 55.3, 54.9, 51.3, 50.1, 50.0, 46.6, 44.1, 43.8, 43.1, 42.2, 40.1, 25.8, 25.8, 18.3, -4.2, -4.3, -4.3, -4.3.

**IR:** 3028 (m), 2857 (m), 1591 (s), 1234 (s), 1157(s), 838 (s).

**HRMS:** Calculated for C<sub>35</sub>H<sub>41</sub>O<sub>4</sub>Si [M+H]<sup>+</sup>: 553.2769. Found: 553.2765.

**Optical rotation:** [ $\alpha$ ]<sub>D</sub><sup>20</sup>: -52.2 (c = 0.25, CHCl<sub>3</sub>) for an enantiomerically enriched sample of 95.5 : 4.5 er.

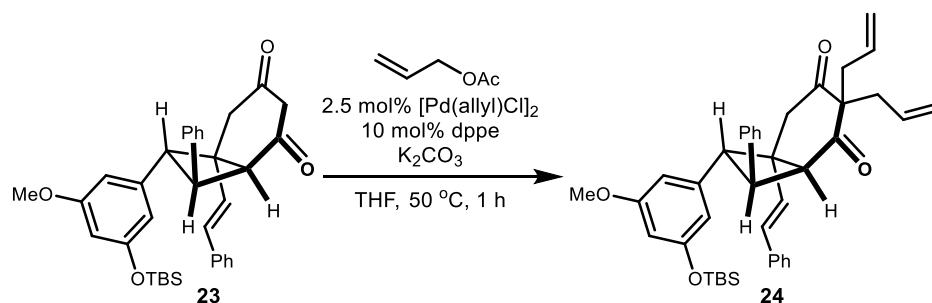

**(1*S*,6*S*,7*R*,8*S*)-3,3-Diallyl-7-(3-((*tert*-butyldimethylsilyl)oxy)-5-methoxyphenyl)-8-phenyl-6-((*E*)-styryl)bicyclo[4.2.0]octane-2,4-dione (24):**

**[Pd pre-catalyst]:** A flame-dried 4 mL vial equipped with a stir bar was cooled under vacuum. After backfilled with N<sub>2</sub> and capped with a septum, the vial was transferred into glovebox and charged with [Pd(allyl)Cl]<sub>2</sub> (7.3 mg, 0.020 mmol, 0.025 eq.) and dppe (31.9 mg, 0.0800 mmol, 0.100 eq.). Then the vial was moved out and THF (1 mL) was added. The mixture was stirred at room temperature for 10 min to afford (dppe)Pd(allyl) pre-catalyst solution.

**[Allylation]:** A flame-dried 25 mL round bottom flask equipped with a stir bar was cooled under vacuum. After backfilled with N<sub>2</sub> (x 3) and capped with a septum, diketone **23** (442 mg, 0.800 mmol, 1.00 eq.), allyl acetate (0.26 mL, 2.4 mmol, 3.0 eq.) and potassium carbonate (548 mg, 4.00 mmol, 5.00 eq.) were added followed by THF (7 mL). To the stirring suspension was added (dppe)Pd(allyl) pre-catalyst solution via syringe. The septum was replaced with a stopper and the reaction was heated to 50 °C for 1 h. After cooled down to room temperature, the mixture was filtered through a pad of silica gel. The filtrate was concentrated by rotary evaporation to afford bisallylated diketone **24** (500 mg, 98% yield) as colorless oil without further purification.

**<sup>1</sup>H NMR (600 MHz, CDCl<sub>3</sub>):** δ 7.34 – 7.01 (m, 10H), 6.51 (d, *J* = 16.2 Hz, 1H), 6.32 (s, 1H), 6.27 (s, 1H), 6.25 (s, 1H), 6.11 (d, *J* = 16.2 Hz, 1H), 5.54 (ddt, *J* = 17.4, 10.1, 7.4 Hz, 1H), 5.18 (ddt, *J* = 17.4, 10.1, 7.4 Hz, 1H), 5.07 (d, *J* = 10.0 Hz, 1H), 5.04 (d, *J* = 16.9 Hz, 1H), 4.84 (d, *J* = 10.6 Hz, 1H), 4.82 (d, *J* = 17.7 Hz, 1H), 4.42 (t, *J* = 11.2 Hz, 1H), 3.77 (d, *J* = 11.8 Hz, 1H), 3.74 (d, *J* = 10.6 Hz, 1H), 3.69 (s, 3H), 2.95 (d, *J* = 14.7 Hz, 1H), 2.84 (d, *J* = 14.7 Hz, 1H), 2.53 (dd, *J* = 13.9, 7.3 Hz, 1H), 2.44 (dd, *J* = 13.9, 7.4 Hz, 1H), 2.33 (dd, *J* = 13.9, 7.5 Hz, 1H), 2.26 (dd, *J* = 13.9, 7.4 Hz, 1H), 0.91 (s, 9H), 0.10 (s, 3H), 0.08 (s, 3H).

**<sup>13</sup>C NMR (126 MHz, CDCl<sub>3</sub>):** δ 209.2, 208.4, 160.9, 157.1, 139.6, 137.8, 136.6, 132.8, 132.0, 131.1, 129.7, 128.7, 128.2, 127.9, 127.9, 127.0, 126.5, 119.8, 119.2, 111.9, 106.7, 105.0, 67.0, 55.4, 52.9, 52.6, 49.5, 43.3, 43.0, 42.2, 36.2, 25.8, 18.4, -4.2, -4.3.

**IR:** 3028 (m), 2858 (m), 1686 (m), 1639 (s), 1157 (s), 782 (s)

**HRMS:** Calculated for C<sub>41</sub>H<sub>48</sub>O<sub>4</sub>NaSi [M+Na]<sup>+</sup>: 655.3214. Found: 655.3212.

**Optical rotation:** [α]<sub>D</sub><sup>20</sup>: -57.6 (c = 0.25, CHCl<sub>3</sub>) for an enantiomerically enriched sample of 95.5 : 4.5 er.

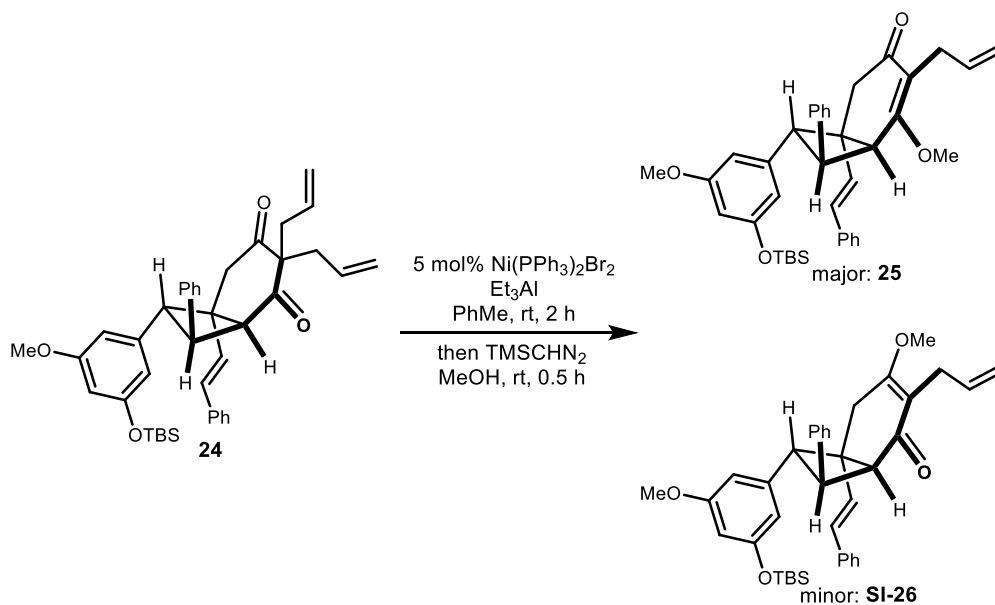

**(1*S*,6*S*,7*S*,8*R*)-4-Allyl-8-(3-((*tert*-butyldimethylsilyl)oxy)-5-methoxyphenyl)-5-methoxy-7-phenyl-1-((*E*)-styryl)bicyclo[4.2.0]oct-4-en-3-one (**25**):** A flame-dried 25 mL round bottom flask equipped with a stir bar was cooled under vacuum. After backfilled with  $\text{N}_2$  and capped with a septum, the vial was transferred into glovebox and charged with  $\text{Ni(PPh}_3)_2\text{Br}_2$  (19 mg, 0.025 mmol, 0.050 eq.). Then the flask was moved out and a solution of diketone **24** (326 mg, 0.500 mmol, 1.00 eq.) in  $\text{PhMe}$  (10 mL) was added via syringe at room temperature followed by addition of triethylaluminum (1 M in hexanes, 1 mL, 1 mmol, 2 eq.). The reaction was stirred at the same temperature for 2 h.  $\text{MeOH}$  (2 mL) was slowly added to the solution. When bubble evolution ceased,  $\text{TMSCHN}_2$  (2.0 M in hexanes, 0.36 mL, 0.75 mmol, 1.5 eq.) was added and the reaction was stirred for another 0.5 h before it was quenched with  $\text{AcOH}$  (5 drops). The mixture was concentrated by rotary evaporation and purified by FCC (Hex :  $\text{EtOAc}$  = 15 : 1 to 6 : 1) to afford methoxyl ether **25** (220 mg, 73% yield) and methoxyl ether **SI-26** (58 mg, 19% yield) as pale yellow oils.

**Major 25:**  $^1\text{H NMR}$  (600 MHz,  $\text{CDCl}_3$ ):  $\delta$  7.35 – 7.30 (m, 2H), 7.29 – 7.17 (m, 8H), 6.51 (d,  $J$  = 16.2 Hz, 1H), 6.28 (d,  $J$  = 16.2 Hz, 1H), 6.27 (s, 1H), 6.21 (s, 1H), 6.20 (s, 1H), 5.89 (ddt,  $J$  = 16.8, 10.0, 6.7 Hz, 1H), 5.08 (d,  $J$  = 17.1 Hz, 1H), 4.99 (d,  $J$  = 10.0 Hz, 1H), 4.22 (dd,  $J$  = 11.5, 9.5 Hz, 1H), 4.03 (d,  $J$  = 11.7 Hz, 1H), 3.85 (d,  $J$  = 9.3 Hz, 1H), 3.66 (s, 3H), 3.26 (dd,  $J$  = 13.9, 6.7 Hz, 1H), 3.25 (s, 3H), 3.11 (dd,  $J$  = 13.9, 6.7 Hz, 1H), 2.82 (d,  $J$  = 16.8 Hz, 1H), 2.60 (d,  $J$  = 16.8 Hz, 1H), 0.90 (s, 9H), 0.07 (s, 3H), 0.06 (s, 3H).

$^{13}\text{C NMR}$  (126 MHz,  $\text{CDCl}_3$ ):  $\delta$  195.3, 168.2, 160.7, 156.9, 140.2, 137.8, 137.0, 136.5, 132.3, 129.5, 128.7, 128.4, 128.1, 127.7, 126.9, 126.4, 120.1, 114.4, 112.3, 107.3, 104.5, 55.5, 55.3, 50.4, 50.0, 43.9, 41.9, 33.3, 27.1, 25.8, 18.3, -4.3, -4.3.

**IR:** 3027 (m), 2856 (m), 1638 (m), 1600 (s), 1365 (m), 1157 (s), 781 (s)

**HRMS:** Calculated for  $\text{C}_{39}\text{H}_{47}\text{O}_4\text{Si}$   $[\text{M}+\text{H}]^+$ : 607.3238. Found: 607.3239.

**Optical rotation:**  $[\alpha]_{\text{D}}^{20}$ : -112.8 ( $c$  = 0.25,  $\text{CHCl}_3$ ) for an enantiomerically enriched sample of 95.5 : 4.5 er.

Regioselectivity was determined by analysis of relevant NOE interactions (see Supporting Information Spectrums).

Minor **SI-26**:  $^1\text{H}$  NMR (600 MHz,  $\text{CDCl}_3$ ):  $\delta$  7.32 – 7.11 (m, 10H), 6.57 (d,  $J$  = 16.2 Hz, 1H), 6.35 (s, 1H), 6.28 (s, 2H), 6.16 (d,  $J$  = 16.2 Hz, 1H), 5.65 (ddt,  $J$  = 16.5, 9.4, 6.3 Hz, 1H), 4.97 (d,  $J$  = 17.1 Hz, 1H), 4.86 (d,  $J$  = 9.9 Hz, 2H), 4.19 (s, 1H), 3.90 (s, 3H), 3.69 (m, 4H), 3.53 (d,  $J$  = 6.2 Hz, 1H), 3.12 (dd,  $J$  = 13.6, 6.0 Hz, 1H), 2.98 (dd,  $J$  = 13.6, 6.0 Hz, 1H), 2.95 (d,  $J$  = 17.7 Hz, 1H), 2.60 (d,  $J$  = 17.9 Hz, 1H), 0.92 (s, 9H), 0.10 (s, 3H), 0.10 (s, 3H).

$^{13}\text{C}$  NMR (126 MHz,  $\text{CDCl}_3$ )  $\delta$  195.3, 168.2, 160.7, 156.9, 140.2, 137.8, 137.0, 136.5, 132.3, 129.5, 128.7, 128.4, 128.1, 127.7, 126.9, 126.4, 120.1, 114.4, 112.3, 107.3, 104.5, 55.5, 55.3, 50.4, 50.0, 43.9, 41.9, 33.3, 27.1, 25.8, 18.3, -4.3, -4.3.

IR: 3027 (m), 2856 (m), 1636 (m), 1604 (s), 1592 (s), 1365 (m), 1157 (s), 781 (s)

HRMS: Calculated for  $\text{C}_{39}\text{H}_{47}\text{O}_4\text{Si}$   $[\text{M}+\text{H}]^+$ : 607.3238. Found: 607.3238.

Optical rotation:  $[\alpha]_{\text{D}}^{20}$ : -70.8 ( $c$  = 0.50,  $\text{CHCl}_3$ ) for an enantiomerically enriched sample of 95.5 : 4.5 er.

Regioselectivity was determined by analysis of relevant NOE interactions (see Supporting Information Spectrums).

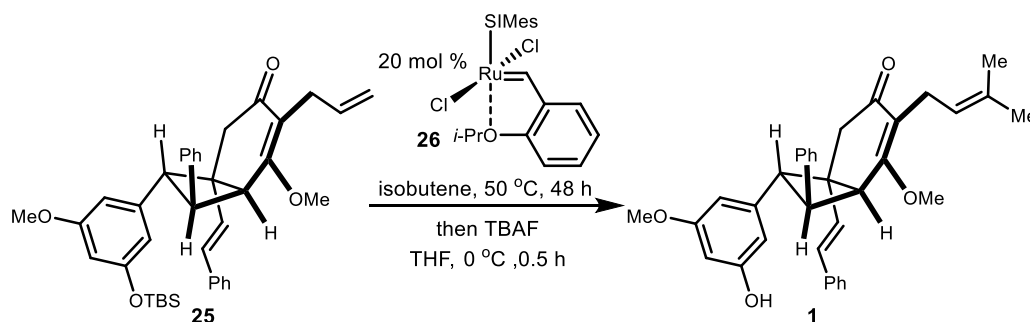

**(1*S*,6*S*,7*S*,8*R*)-8-(3-Hydroxy-5-methoxyphenyl)-5-methoxy-4-(3-methylbut-2-en-1-yl)-7-phenyl-1-((*E*)-styryl)bicyclo[4.2.0]oct-4-en-3-one (1)**: A flame-dried 25 mL sealed tube equipped with a stir bar was cooled under vacuum. After backfilled with  $\text{N}_2$ , alkene **25** (150 mg, 0.250 mmol, 1.00 eq.) was added. The flask was evacuated/backfilled with  $\text{N}_2$  (x 3) and capped with a dry ice/acetone condenser. The sealed tube was cooled to -78 °C in a dry ice/acetone and isobutene (5 mL) was added via the dry ice/acetone condenser. Then a solution of Hoveyda-Grubbs II catalyst **26** (15 mg, 0.025 mmol, 0.10 eq.) in DCM (0.2 mL) was added. The tube was sealed and heated to 50 °C in an oil bath for 24 h. After cooled back down to -78 °C in a dry ice/acetone bath, the seal was open and another portion of Hoveyda-Grubbs II catalyst **26** (15 mg, 0.025 mmol, 0.10 eq.) in DCM (0.2 mL) was added. The reaction was heated to 50 °C in an oil bath for another 24 h. After again cooled back down to -78 °C in a dry ice/acetone bath, the seal was open, and the sealed tube was placed into an ice bath to vent all the isobutene. When bubble evolution ceased, THF (5 mL) was added followed by addition of TBAF (1 M in THF, 0.5 mL, 0.5 mmol, 2 eq.) at the same temperature. After 0.5 h, the reaction was quenched with saturated  $\text{NH}_4\text{Cl}$  solution (5 mL). The aqueous layer was extracted with EtOAc (3 x 5 mL). The combined organic layer was washed with brine (10 mL), dried over anhydrous  $\text{MgSO}_4$ , filtered and concentrated by rotary evaporation. The residue was purified by quick FCC (pentane :  $\text{Et}_2\text{O}$  = 1 : 1.5) to afford cajanusine **1** (98 mg, 82% yield) as pale yellow solid (Note: Natural product was not very stable on silica gel. We observed decomposition when long time standing on column or prepTLC.)

**<sup>1</sup>H NMR (600 MHz, CDCl<sub>3</sub>):** Spectrums vary due to potential aggregation at different temperatures and concentrations (see following discussion). For 10 mg / 0.5 mL CDCl<sub>3</sub> at 20 °C: δ 7.44 – 7.09 (m, 10H), 6.50 (d, *J* = 16.2 Hz, 1H), δ 6.33 – 6.18 (m, 3H), 5.97 (s, 0.66H), 5.90 (s, 0.33H), 5.22 (t, *J* = 7.2 Hz, 1H), 4.20 (dd, *J* = 11.7, 9.3 Hz, 1H), 4.01 (d, *J* = 11.7 Hz, 1H), 3.85 (d, *J* = 9.2 Hz, 1H), 3.65 (s, 3H), 3.25 (s, 3H), 3.15 (dd, *J* = 13.8, 7.6 Hz, 1H), 3.06 (dd, *J* = 13.8, 7.3 Hz, 1H), 2.83 (d, *J* = 16.9 Hz, 0.66H), 2.82 (d, *J* = 16.9 Hz, 0.33H), 2.56 (d, *J* = 16.9 Hz, 0.66H), 2.55 (d, *J* = 16.9 Hz, 0.33H), 1.72 (s, 3H), 1.70 (s, 3H).

**<sup>13</sup>C NMR (101 MHz, CDCl<sub>3</sub>):** No minor peaks were detected at different temperatures and concentrations. δ 197.0, 168.9, 161.0, 157.2, 140.0, 137.6, 137.0, 132.2, 131.7, 129.3, 128.9, 128.8, 128.6, 128.0, 127.7, 126.4, 122.4, 120.7, 107.7, 106.1, 100.1, 55.4, 55.1, 51.0, 45.0, 44.0, 42.4, 42.3, 26.0, 22.3, 17.9.

**IR:** 3390 (br), 2926 (m), 2852 (m), 1596 (s), 1453 (s), 1370 (m), 1154 (m), 697 (m)

**HRMS:** Calculated for C<sub>35</sub>H<sub>37</sub>O<sub>4</sub> [M+H]<sup>+</sup>: 521.2686. Found: 521.2688.

**Optical rotation:** [α]<sub>D</sub><sup>20</sup> : -201.0 (c = 0.30, MeOH) for an enantiomerically enriched sample of 95.5 : 4.5 er. {Literature: [α]<sub>D</sub><sup>25</sup> : -222.0 (c = 0.30, MeOH)}<sup>20</sup>

**Melting point:** 163 °C – 165 °C (Literature: 164 °C – 165 °C)<sup>20</sup>



**$^1\text{H}$ -NMR (600 MHz,  $\text{CDCl}_3$ ) Comparison for Temperatures and Concentrations:**

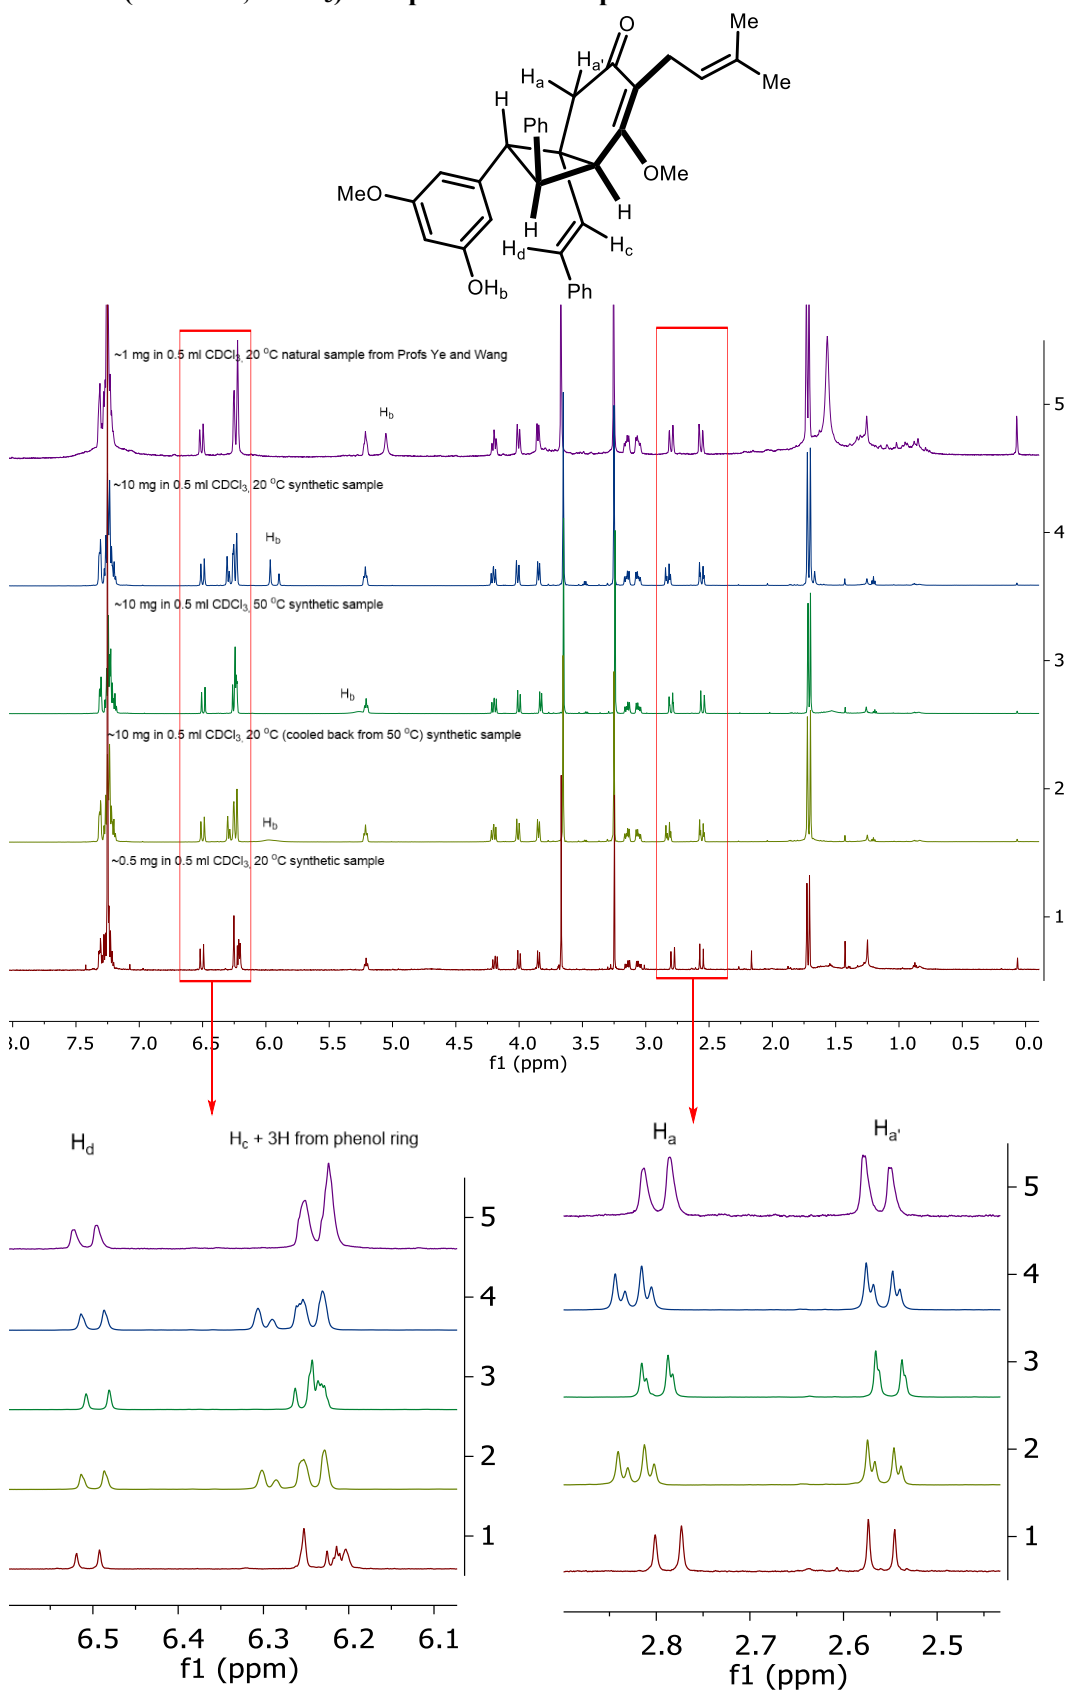

**Comparison of  $^1\text{H}$  NMR ( $\text{CDCl}_3$ ) Spectroscopic Data Natural<sup>25</sup> and Synthetic Cajanusine (10 mg in 0.5 mL  $\text{CDCl}_3$ ):**

| A: Natural<br>$\delta\text{H}$ [ppm, mult, $J$ (Hz)],<br>300 MHz | B: Our Synthetic<br>$\delta\text{H}$ [ppm, mult, $J$ (Hz)],<br>600 MHz | Error<br>(B – A)<br>$\Delta\delta/\text{ppm}$ |
|------------------------------------------------------------------|------------------------------------------------------------------------|-----------------------------------------------|
| 7.31-7.24 (m, 10H)                                               | 7.32-7.20 (m, 10H)                                                     | -                                             |
| 6.50 (d, $J$ = 16.2 Hz, 1H)                                      | 6.50 (d, $J$ = 16.2 Hz, 1H)                                            | 0.00                                          |
| 6.32-6.22 (m, $J$ = 4H)                                          | $\delta$ 6.33 – 6.18 (m, 4H)                                           | -                                             |
| 5.22 (dd, $J$ = 7.2, 7.2 Hz, 1H)                                 | 5.22 (t, $J$ = 7.2 Hz, 1H)                                             | 0.00                                          |
| -                                                                | 5.97 (s, 0.66H)                                                        | -                                             |
| -                                                                | 5.88 (s, 0.33H)                                                        | -                                             |
| 4.21 (dd, $J$ = 11.7, 9.3 Hz, 1H)                                | 4.20 (dd, $J$ = 11.7, 9.3 Hz, 1H)                                      | -0.01                                         |
| 4.01 (d, $J$ = 11.7 Hz, 1H)                                      | 4.01 (d, $J$ = 11.7 Hz, 1H),                                           | 0.00                                          |
| 3.85 (d, $J$ = 9.3 Hz)                                           | 3.85 (d, $J$ = 9.2 Hz, 1H)                                             | 0.00                                          |
| 3.64 (s, 3H)                                                     | 3.65 (s, 3H)                                                           | 0.01                                          |
| 3.25 (s, 3H)                                                     | 3.25 (s, 3H)                                                           | 0.00                                          |
| 3.16 (dd, $J$ = 13.8, 7.2 Hz, 1H)                                | 3.15 (dd, $J$ = 13.8, 7.6 Hz, 1H)                                      | -0.01                                         |
| 3.06 (dd, $J$ = 13.8, 7.2 Hz, 1H)                                | 3.15 (dd, $J$ = 13.8, 7.6 Hz, 1H)                                      | 0.00                                          |
| 2.84 (d, $J$ = 17.1 Hz, 1H)                                      | 2.83 (d, $J$ = 16.9 Hz, 0.66H)                                         | -0.01                                         |
|                                                                  | 2.82 (d, $J$ = 16.9 Hz, 0.33H)                                         | -0.02                                         |
| 2.55 (d, $J$ = 17.1 Hz, 1H)                                      | 2.56 (d, $J$ = 16.9 Hz, 0.66H).                                        | 0.01                                          |
|                                                                  | 2.55 (d, $J$ = 16.9 Hz, 0.33H)                                         | 0.00                                          |
| 1.73 (s, 3H)                                                     | 1.72 (s, 3H)                                                           | -0.01                                         |
| 1.70 (s, 3H)                                                     | 1.70 (s, 3H)                                                           | 0.00                                          |

**Comparison of  $^{13}\text{C}$  NMR ( $\text{CDCl}_3$ ) Spectroscopic Data Natural<sup>25</sup> and Synthetic Cajanusine:**

| Natural <sup>[6]</sup><br>$\delta$ (ppm) 75 MHz | our Synthetic<br>$\delta$ (ppm) 100 MHz | Error<br>(B – A)<br>$\Delta\delta/\text{ppm}$ |
|-------------------------------------------------|-----------------------------------------|-----------------------------------------------|
| 197.3                                           | 197.0                                   | -0.3                                          |
| 169.2                                           | 168.9                                   | -0.3                                          |
| 160.9                                           | 161.0                                   | 0.1                                           |
| 157.4                                           | 157.2                                   | -0.2                                          |
| 139.8                                           | 140.0                                   | 0.2                                           |
| 137.5                                           | 137.6                                   | 0.1                                           |
| 137.0                                           | 137.0                                   | 0.0                                           |
| 132.1                                           | 132.2                                   | 0.1                                           |
| 131.7                                           | 131.7                                   | 0.0                                           |
| 129.2                                           | 129.3                                   | 0.1                                           |
| 128.8                                           | 128.9                                   | 0.1                                           |
| 128.7                                           | 128.8                                   | 0.1                                           |
| 128.6                                           | 128.6                                   | 0.0                                           |
| 128.0                                           | 128.0                                   | 0.0                                           |
| 127.7                                           | 127.7                                   | 0.0                                           |
| 126.4                                           | 126.4                                   | 0.0                                           |
| 122.3                                           | 122.4                                   | 0.1                                           |
| 120.6                                           | 120.7                                   | 0.1                                           |
| 107.7                                           | 107.7                                   | 0.0                                           |
| 105.8                                           | 106.0                                   | 0.2                                           |
| 100.0                                           | 100.0                                   | 0.0                                           |
| 55.4                                            | 55.4                                    | 0.0                                           |
| 55.1                                            | 55.1                                    | 0.0                                           |
| 50.1                                            | 50.1                                    | 0.0                                           |
| 45.0                                            | 45.0                                    | 0.0                                           |
| 43.9                                            | 44.0                                    | 0.1                                           |
| 42.4                                            | 42.4                                    | 0.0                                           |
| 42.2                                            | 42.3                                    | 0.1                                           |
| 26.0                                            | 26.1                                    | 0.1                                           |
| 22.2                                            | 22.3                                    | 0.1                                           |
| 17.9                                            | 18.0                                    | 0.1                                           |

## Coordinates and Energies for Computed Structures:

Geometries optimized with M06-2X<sup>26</sup>/6-311g(d,p) and characterized by frequency analysis using Gaussian09.<sup>27</sup>

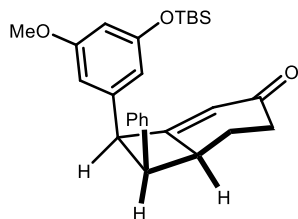

|                                              |                             |
|----------------------------------------------|-----------------------------|
| Zero-point correction=                       | 0.550307 (Hartree/Particle) |
| Thermal correction to Energy=                | 0.582316                    |
| Thermal correction to Enthalpy=              | 0.583260                    |
| Thermal correction to Gibbs Free Energy=     | 0.484738                    |
| Sum of electronic and zero-point Energies=   | -1563.795055                |
| Sum of electronic and thermal Energies=      | -1563.763046                |
| Sum of electronic and thermal Enthalpies=    | -1563.762102                |
| Sum of electronic and thermal Free Energies= | -1563.860624                |

| Center<br>Number | Atomic<br>Number | Atomic<br>Type | Coordinates (Angstroms) |           |           |
|------------------|------------------|----------------|-------------------------|-----------|-----------|
|                  |                  |                | X                       | Y         | Z         |
| 1                | 6                | 0              | 1.973949                | 1.815423  | 0.855973  |
| 2                | 6                | 0              | 1.518064                | 2.692034  | -0.039655 |
| 3                | 6                | 0              | 2.428026                | 3.775424  | -0.480450 |
| 4                | 6                | 0              | 3.839672                | 3.784001  | 0.099177  |
| 5                | 6                | 0              | 4.382151                | 2.379085  | 0.398186  |
| 6                | 6                | 0              | 3.395832                | 1.700272  | 1.332637  |
| 7                | 1                | 0              | 3.796628                | 4.368968  | 1.026655  |
| 8                | 1                | 0              | 4.472596                | 4.330856  | -0.600480 |
| 9                | 1                | 0              | 5.383080                | 2.436199  | 0.831300  |
| 10               | 1                | 0              | 4.457208                | 1.813585  | -0.534581 |
| 11               | 1                | 0              | 3.493785                | 2.087594  | 2.352581  |
| 12               | 1                | 0              | 0.536886                | 2.652221  | -0.498604 |
| 13               | 8                | 0              | 2.064911                | 4.627733  | -1.261084 |
| 14               | 6                | 0              | 1.612807                | 0.465726  | 1.433860  |
| 15               | 6                | 0              | 3.156847                | 0.142644  | 1.408068  |
| 16               | 1                | 0              | 3.523597                | -0.312155 | 2.328058  |
| 17               | 1                | 0              | 1.359916                | 0.622591  | 2.489942  |
| 18               | 6                | 0              | 3.692450                | -0.632777 | 0.231888  |
| 19               | 6                | 0              | 3.169058                | -0.513081 | -1.060769 |
| 20               | 6                | 0              | 4.772794                | -1.494087 | 0.431458  |
| 21               | 6                | 0              | 3.715478                | -1.233489 | -2.115778 |
| 22               | 1                | 0              | 2.320334                | 0.135423  | -1.245529 |
| 23               | 6                | 0              | 5.320861                | -2.218038 | -0.623680 |

|    |    |   |           |           |           |
|----|----|---|-----------|-----------|-----------|
| 24 | 1  | 0 | 5.188324  | -1.601033 | 1.428544  |
| 25 | 6  | 0 | 4.792724  | -2.089616 | -1.902407 |
| 26 | 1  | 0 | 3.292705  | -1.129922 | -3.108256 |
| 27 | 1  | 0 | 6.158388  | -2.882086 | -0.443392 |
| 28 | 1  | 0 | 5.213786  | -2.652449 | -2.727145 |
| 29 | 6  | 0 | 0.566704  | -0.422092 | 0.815780  |
| 30 | 6  | 0 | 0.796070  | -1.795416 | 0.698176  |
| 31 | 6  | 0 | -0.644984 | 0.123015  | 0.407587  |
| 32 | 6  | 0 | -0.184951 | -2.611975 | 0.138862  |
| 33 | 1  | 0 | 1.743302  | -2.206042 | 1.017409  |
| 34 | 6  | 0 | -1.627175 | -0.708371 | -0.137621 |
| 35 | 1  | 0 | -0.855211 | 1.180336  | 0.514538  |
| 36 | 6  | 0 | -1.402514 | -2.069732 | -0.279107 |
| 37 | 1  | 0 | -2.152120 | -2.712116 | -0.724413 |
| 38 | 8  | 0 | -0.039834 | -3.945850 | -0.047410 |
| 39 | 6  | 0 | 1.218535  | -4.517532 | 0.262927  |
| 40 | 1  | 0 | 2.021900  | -4.044687 | -0.311506 |
| 41 | 1  | 0 | 1.146250  | -5.567824 | -0.012374 |
| 42 | 1  | 0 | 1.438251  | -4.440918 | 1.332454  |
| 43 | 8  | 0 | -2.802758 | -0.162161 | -0.557093 |
| 44 | 14 | 0 | -4.218137 | -0.140409 | 0.367298  |
| 45 | 6  | 0 | -4.828813 | -1.892936 | 0.597740  |
| 46 | 1  | 0 | -4.138579 | -2.467409 | 1.222350  |
| 47 | 1  | 0 | -4.933525 | -2.415148 | -0.356723 |
| 48 | 1  | 0 | -5.803460 | -1.903086 | 1.095472  |
| 49 | 6  | 0 | -3.829951 | 0.615725  | 2.032938  |
| 50 | 1  | 0 | -3.035329 | 0.053279  | 2.532820  |
| 51 | 1  | 0 | -4.707509 | 0.589120  | 2.685668  |
| 52 | 1  | 0 | -3.501836 | 1.655229  | 1.949731  |
| 53 | 6  | 0 | -5.410073 | 0.908818  | -0.647009 |
| 54 | 6  | 0 | -6.676594 | 1.184799  | 0.176252  |
| 55 | 1  | 0 | -7.390760 | 1.766524  | -0.418431 |
| 56 | 1  | 0 | -6.455819 | 1.761484  | 1.079721  |
| 57 | 1  | 0 | -7.180937 | 0.261162  | 0.478567  |
| 58 | 6  | 0 | -5.789467 | 0.161117  | -1.932973 |
| 59 | 1  | 0 | -6.328184 | -0.766591 | -1.717666 |
| 60 | 1  | 0 | -4.906854 | -0.088385 | -2.529225 |
| 61 | 1  | 0 | -6.443879 | 0.786326  | -2.552085 |
| 62 | 6  | 0 | -4.741320 | 2.240894  | -1.013499 |
| 63 | 1  | 0 | -4.457506 | 2.812596  | -0.124307 |
| 64 | 1  | 0 | -5.434334 | 2.861001  | -1.594574 |
| 65 | 1  | 0 | -3.842802 | 2.084293  | -1.615358 |

---

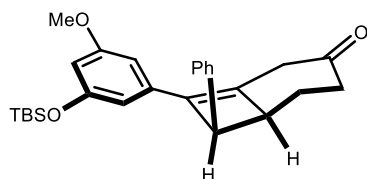

Zero-point correction= 0.549495 (Hartree/Particle)  
 Thermal correction to Energy= 0.581907  
 Thermal correction to Enthalpy= 0.582852  
 Thermal correction to Gibbs Free Energy= 0.482375  
 Sum of electronic and zero-point Energies= -1563.796663  
 Sum of electronic and thermal Energies= -1563.764250  
 Sum of electronic and thermal Enthalpies= -1563.763306  
 Sum of electronic and thermal Free Energies= -1563.863782

| Center<br>Number | Atomic<br>Number | Atomic<br>Type | Coordinates (Angstroms) |           |           |
|------------------|------------------|----------------|-------------------------|-----------|-----------|
|                  |                  |                | X                       | Y         | Z         |
| 1                | 6                | 0              | 1.806876                | 1.811504  | 0.692013  |
| 2                | 6                | 0              | 3.205193                | 1.727967  | 1.241530  |
| 3                | 6                | 0              | 4.188919                | 2.411054  | 0.300471  |
| 4                | 6                | 0              | 3.687220                | 3.848252  | 0.059371  |
| 5                | 6                | 0              | 2.284749                | 3.892372  | -0.529491 |
| 6                | 6                | 0              | 1.202241                | 3.073943  | 0.184803  |
| 7                | 6                | 0              | 1.601389                | 0.482375  | 0.688825  |
| 8                | 6                | 0              | 2.991070                | 0.161724  | 1.230806  |
| 9                | 8                | 0              | 2.017308                | 4.552749  | -1.500142 |
| 10               | 6                | 0              | 0.502682                | -0.407365 | 0.313635  |
| 11               | 6                | 0              | -0.763521               | 0.096733  | 0.013945  |
| 12               | 6                | 0              | -1.784872               | -0.780998 | -0.347296 |
| 13               | 6                | 0              | -1.555743               | -2.149518 | -0.411773 |
| 14               | 6                | 0              | -0.289021               | -2.651789 | -0.106755 |
| 15               | 6                | 0              | 0.739332                | -1.788089 | 0.264468  |
| 16               | 6                | 0              | 3.940989                | -0.633393 | 0.370372  |
| 17               | 6                | 0              | 5.075186                | -1.207978 | 0.949193  |
| 18               | 6                | 0              | 5.992339                | -1.913150 | 0.177842  |
| 19               | 6                | 0              | 5.785691                | -2.060104 | -1.190025 |
| 20               | 6                | 0              | 4.657647                | -1.496494 | -1.777607 |
| 21               | 6                | 0              | 3.742772                | -0.789124 | -1.003932 |
| 22               | 8                | 0              | -3.017339               | -0.288882 | -0.658399 |
| 23               | 14               | 0              | -4.253950               | -0.069849 | 0.473957  |
| 24               | 6                | 0              | -5.679868               | 0.632141  | -0.537376 |
| 25               | 6                | 0              | -4.662557               | -1.722970 | 1.246111  |
| 26               | 6                | 0              | -3.664586               | 1.112740  | 1.797697  |
| 27               | 6                | 0              | -6.198530               | -0.437424 | -1.508740 |
| 28               | 6                | 0              | -6.814104               | 1.059668  | 0.405229  |
| 29               | 6                | 0              | -5.195091               | 1.849887  | -1.336236 |
| 30               | 8                | 0              | -0.150279               | -3.995718 | -0.201238 |

|    |   |   |           |           |           |
|----|---|---|-----------|-----------|-----------|
| 31 | 6 | 0 | 1.130695  | -4.542436 | 0.057916  |
| 32 | 1 | 0 | 3.314466  | 2.125758  | 2.256768  |
| 33 | 1 | 0 | 5.203025  | 2.430649  | 0.706888  |
| 34 | 1 | 0 | 4.229955  | 1.877481  | -0.653544 |
| 35 | 1 | 0 | 4.341563  | 4.404187  | -0.612185 |
| 36 | 1 | 0 | 3.652068  | 4.381159  | 1.018507  |
| 37 | 1 | 0 | 0.854134  | 3.691040  | 1.025417  |
| 38 | 1 | 0 | 0.368469  | 2.928578  | -0.501595 |
| 39 | 1 | 0 | 2.986464  | -0.255845 | 2.242178  |
| 40 | 1 | 0 | -0.976685 | 1.157217  | 0.066275  |
| 41 | 1 | 0 | -2.348220 | -2.828313 | -0.701507 |
| 42 | 1 | 0 | 1.725202  | -2.162392 | 0.502128  |
| 43 | 1 | 0 | 5.237592  | -1.100828 | 2.017276  |
| 44 | 1 | 0 | 6.866198  | -2.351780 | 0.645856  |
| 45 | 1 | 0 | 6.496395  | -2.612964 | -1.792975 |
| 46 | 1 | 0 | 4.485601  | -1.609687 | -2.841813 |
| 47 | 1 | 0 | 2.860759  | -0.361800 | -1.469629 |
| 48 | 1 | 0 | -3.814631 | -2.099962 | 1.825628  |
| 49 | 1 | 0 | -5.511714 | -1.635176 | 1.930785  |
| 50 | 1 | 0 | -4.913779 | -2.474360 | 0.493229  |
| 51 | 1 | 0 | -4.424750 | 1.231826  | 2.575497  |
| 52 | 1 | 0 | -3.435086 | 2.103116  | 1.395543  |
| 53 | 1 | 0 | -2.761497 | 0.729001  | 2.281892  |
| 54 | 1 | 0 | -5.406322 | -0.797144 | -2.171821 |
| 55 | 1 | 0 | -6.995158 | -0.020533 | -2.136426 |
| 56 | 1 | 0 | -6.615214 | -1.298591 | -0.977794 |
| 57 | 1 | 0 | -6.499374 | 1.859340  | 1.082728  |
| 58 | 1 | 0 | -7.663063 | 1.437316  | -0.176790 |
| 59 | 1 | 0 | -7.180606 | 0.225555  | 1.012533  |
| 60 | 1 | 0 | -4.394067 | 1.580085  | -2.028927 |
| 61 | 1 | 0 | -4.823062 | 2.644316  | -0.681713 |
| 62 | 1 | 0 | -6.022819 | 2.267898  | -1.921600 |
| 63 | 1 | 0 | 1.036682  | -5.614487 | -0.102790 |
| 64 | 1 | 0 | 1.440140  | -4.358266 | 1.091364  |
| 65 | 1 | 0 | 1.882549  | -4.136863 | -0.626532 |

---

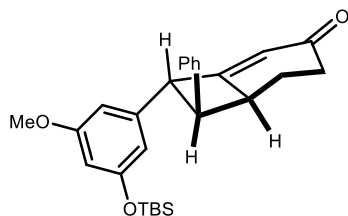

Zero-point correction= 0.549952 (Hartree/Particle)  
 Thermal correction to Energy= 0.582171  
 Thermal correction to Enthalpy= 0.583115  
 Thermal correction to Gibbs Free Energy= 0.482228  
 Sum of electronic and zero-point Energies= -1563.796002  
 Sum of electronic and thermal Energies= -1563.763783  
 Sum of electronic and thermal Enthalpies= -1563.762839  
 Sum of electronic and thermal Free Energies= -1563.863726

| Center<br>Number | Atomic<br>Number | Atomic<br>Type | Coordinates (Angstroms) |           |           |
|------------------|------------------|----------------|-------------------------|-----------|-----------|
|                  |                  |                | X                       | Y         | Z         |
| 1                | 6                | 0              | 1.718782                | -1.238474 | 0.283030  |
| 2                | 6                | 0              | 2.348329                | -1.107720 | -1.072312 |
| 3                | 6                | 0              | 3.295613                | -2.254664 | -1.378444 |
| 4                | 6                | 0              | 2.548259                | -3.560125 | -1.065471 |
| 5                | 6                | 0              | 2.011307                | -3.633024 | 0.362166  |
| 6                | 6                | 0              | 1.613642                | -2.356089 | 1.001847  |
| 7                | 6                | 0              | 1.726488                | 0.251342  | 0.529201  |
| 8                | 6                | 0              | 2.792092                | 0.341800  | -0.630853 |
| 9                | 8                | 0              | 1.910690                | -4.691642 | 0.942224  |
| 10               | 6                | 0              | 0.443472                | 0.988372  | 0.213687  |
| 11               | 6                | 0              | -0.733948               | 0.314139  | -0.069355 |
| 12               | 6                | 0              | -1.893888               | 1.043636  | -0.361395 |
| 13               | 6                | 0              | -1.873935               | 2.427479  | -0.370378 |
| 14               | 6                | 0              | -0.681015               | 3.102350  | -0.086620 |
| 15               | 6                | 0              | 0.477812                | 2.389188  | 0.206180  |
| 16               | 6                | 0              | 4.230901                | 0.468697  | -0.208136 |
| 17               | 6                | 0              | 5.136411                | 1.099137  | -1.064974 |
| 18               | 6                | 0              | 6.484167                | 1.198759  | -0.737822 |
| 19               | 6                | 0              | 6.952202                | 0.665762  | 0.458037  |
| 20               | 6                | 0              | 6.062165                | 0.033885  | 1.320111  |
| 21               | 6                | 0              | 4.714309                | -0.064147 | 0.991199  |
| 22               | 8                | 0              | -3.046854               | 0.383281  | -0.659803 |
| 23               | 14               | 0              | -4.131200               | -0.189464 | 0.506603  |
| 24               | 6                | 0              | -5.504667               | -0.989518 | -0.505185 |
| 25               | 6                | 0              | -3.249451               | -1.412333 | 1.613579  |
| 26               | 6                | 0              | -4.733942               | 1.258376  | 1.523718  |
| 27               | 6                | 0              | -4.960976               | -2.235908 | -1.217611 |
| 28               | 6                | 0              | -6.656356               | -1.395301 | 0.425833  |



|    |   |   |           |           |           |
|----|---|---|-----------|-----------|-----------|
| 29 | 6 | 0 | -6.022792 | 0.006996  | -1.551388 |
| 30 | 8 | 0 | -0.756413 | 4.453978  | -0.118674 |
| 31 | 6 | 0 | 0.422400  | 5.186705  | 0.158635  |
| 32 | 1 | 0 | 1.579769  | -1.012749 | -1.847374 |
| 33 | 1 | 0 | 3.633705  | -2.244866 | -2.416785 |
| 34 | 1 | 0 | 4.181230  | -2.179958 | -0.740303 |
| 35 | 1 | 0 | 3.173004  | -4.440714 | -1.218909 |
| 36 | 1 | 0 | 1.681267  | -3.655976 | -1.731471 |
| 37 | 1 | 0 | 1.289975  | -2.385627 | 2.037185  |
| 38 | 1 | 0 | 2.092277  | 0.555797  | 1.513169  |
| 39 | 1 | 0 | 2.558907  | 1.106975  | -1.371685 |
| 40 | 1 | 0 | -0.778968 | -0.768701 | -0.067563 |
| 41 | 1 | 0 | -2.769650 | 2.991605  | -0.598806 |
| 42 | 1 | 0 | 1.409046  | 2.894555  | 0.429702  |
| 43 | 1 | 0 | 4.776983  | 1.517737  | -1.999532 |
| 44 | 1 | 0 | 7.167685  | 1.695377  | -1.416780 |
| 45 | 1 | 0 | 8.001458  | 0.742813  | 0.717284  |
| 46 | 1 | 0 | 6.417017  | -0.385710 | 2.254341  |
| 47 | 1 | 0 | 4.040054  | -0.568843 | 1.674478  |
| 48 | 1 | 0 | -2.466294 | -0.916520 | 2.194868  |
| 49 | 1 | 0 | -3.947500 | -1.861861 | 2.326587  |
| 50 | 1 | 0 | -2.783860 | -2.221474 | 1.045091  |
| 51 | 1 | 0 | -5.406365 | 0.922277  | 2.318522  |
| 52 | 1 | 0 | -5.267332 | 1.995381  | 0.917640  |
| 53 | 1 | 0 | -3.892209 | 1.767127  | 2.003361  |
| 54 | 1 | 0 | -4.112210 | -1.992295 | -1.863330 |
| 55 | 1 | 0 | -5.741906 | -2.679920 | -1.846424 |
| 56 | 1 | 0 | -4.638039 | -3.000981 | -0.505292 |
| 57 | 1 | 0 | -7.103995 | -0.527886 | 0.920576  |
| 58 | 1 | 0 | -7.447618 | -1.889428 | -0.150215 |
| 59 | 1 | 0 | -6.331023 | -2.097129 | 1.200555  |
| 60 | 1 | 0 | -6.826533 | -0.451768 | -2.139672 |
| 61 | 1 | 0 | -5.230724 | 0.310591  | -2.240428 |
| 62 | 1 | 0 | -6.431363 | 0.909651  | -1.086544 |
| 63 | 1 | 0 | 0.148968  | 6.236768  | 0.077525  |
| 64 | 1 | 0 | 1.210544  | 4.961773  | -0.566668 |
| 65 | 1 | 0 | 0.786807  | 4.985616  | 1.170809  |

---

## Renference:

- [1]: Vakulya, B.; Varga, S.; Csámpai, A.; Soós, T. *Org. Lett.* **2005**, *7*, 1967-1969.
- [2]: Bowden, K.; Heilbron, I. M.; Jones, E. R. H. *J. Chem. Soc.* **1946**, 39-45.
- [3]: Standley, E. A.; Smith, S. J.; Müller, P.; Jamison, T. F. *Organometallics* **2014**, *33*, 2012-2018.
- [4]: Frigerio, M.; Santagostino, M.; Sputore, S. *J. Org. Chem.* **1999**, *64*, 4537-4538.
- [5]: Li, W.; Herath, A.; Montgomery, J. *J. Am. Chem. Soc.* **2009**, *131*, 17024-17029.
- [6]: McGrath, K. P.; Hoveyda, A. H. *Angew. Chem. Int. Ed.* **2014**, *53*, 1910-1914.
- [7]: Lipshutz, B. H.; Ellsworth, E. L. *J. Am. Chem. Soc.* **1990**, *112*, 7440-7441.
- [8]: Dunsford, J. J.; Clark, E. R.; Ingleson, M. J. *Angew. Chem. Int. Ed.* **2015**, *54*, 5688-5692.
- [9]: Zhou, J. S.; Fu, G. C. *J. Am. Chem. Soc.* **2004**, *126*, 1340-1341.
- [10]: Zhang, P.; Le, C. C.; MacMillan, D. W. C. *J. Am. Chem. Soc.* **2016**, *138*, 8084-8087.
- [11]: Everson, D. A.; Shrestha, R.; Weix, D. J. *J. Am. Chem. Soc.* **2010**, *132*, 920-921.
- [12]: Huihui, K. M. M.; Caputo, J. A.; Melchor, Z.; Olivares, A. M.; Spiewak, A. M.; Johnson, K. A.; Dibenedetto, T. A.; Kim, S.; Ackerman, L. K. G.; Weix, D. J. *J. Am. Chem. Soc.* **2016**, *138*, 5016-5019.
- [13]: Anka-Lufford, L. L.; Huihui, K. M. M.; Gower, N. J.; Ackerman, L. K. G.; Weix, D. J. *Chem. Eur. J.* **2016**, *22*, 11564-11567.
- [14]: Suzuki, N.; Hofstra, J. L.; Poremba, K. E.; Reisman, S. E. *Org. Lett.* **2017**, *19*, 2150-2153.
- [15]: Zhang, J.; Li, Z.; Zhuo, J.; Cui, Y.; Han, T.; Li, C. *J. Am. Chem. Soc.* **2019**, *141*, 8372-8380.
- [16]: Sandfort, F.; O'Neill, M. J.; Cornella, J.; Wimmer, L.; Baran, P. S. *Angew. Chem. Int. Ed.* **2017**, *56*, 3319-3323.
- [17]: Liu, X-G.; Zhou, C-J.; Lin, E.; Han, X-L.; Zhang, S-S.; Li, Q.; Wang H. *Angew. Chem. Int. Ed.* **2018**, *57*, 13096-13100.
- [18]: Chen, T-G.; Zhang, H.; Mykhailiuk, P. K.; Merchant, R. R.; Smith, Courtney, A.; Qin, T.; Banran, P. S. *Angew. Chem. Int. Ed.* **2019**, *58*, 2454-2458.
- [19]: Line, N. J.; Witherspoon, B. P.; Hancock, E. N.; Brown, M. K. *J. Am. Chem. Soc.* **2017**, *139*, 14392-14395.
- [20]: Wenkert, E.; Michelotti, E. L.; Swindell, C. S.; Tingoli, M. *J. Org. Chem.* **1984**, *49*, 4894-4899.
- [21]: Ben, I.; Castedo, L.; Saa, J. A.; SeiJas, J. A.; Suau, R.; ToJo, G. *J. Org. Chem.* **1985**, *50*, 2236-2240.
- [22]: Hurst, T. E.; Macklin, T. K.; Becker, M.; Hartmann, E.; Kugel, W.; Parisienne-LaSalle, J-C.; Batsanov, A. S.; Marder, T. B.; Snieckus, V. *Chem. Eur. J.* **2010**, *16*, 8155-8161.
- [23]: Wada, Y.; Matsumoto, A.; Asano, K.; Matsubara, S. *RSC Adv.* **2019**, *9*, 31654-31658.
- [24]: Krasovskiy, A.; Knochel, P. *Synthesis.* **2006**, *5*, 890-891.
- [25]: Li, X-L.; Zhao, B-X.; Huang X-J.; Zhang, D-M.; Jiang, R-W.; Li, Y-J.; Jian, Y-Q.; Wang, Y.; Li, Y-L.; Ye, W-C. *Org. Lett.* **2014**, *16*, 224-227.
- [26]: Zhao, Y.; Truhlar, D. G. *Theor. Chem. Acc.* **2008**, *120*, 215-241.

[27]: Frisch, M. J.; Trucks, G. W.; Schlegel, H. B.; Scuseria, G. E.; Robb, M. A.; Cheeseman, J. R.; Scalmani, G.; Barone, V.; Mennucci, B.; Petersson, G. A.; Nakatsuji, H.; Caricato, M.; Li, X.; Hratchian, H. P.; Izmaylov, A. F.; Bloino, J.; Zheng, G.; Sonnenberg, J. L.; Hada, M.; Ehara, M.; Toyota, K.; Fukuda, R.; Hasegawa, J.; Ishida, M.; NakaJima, T.; Honda, Y.; Kitao, O.; Nakai, H.; Vreven, T.; Montgomery, J. A., Jr.; Peralta, J. E.; Ogliaro, F.; Bearpark, M.; Heyd, J. J.; Brothers, E.; Kudin, K. N.; Staroverov, V. N.; Kobayashi, R.; Normand, J.; Raghavachari, K.; Rendell, A.; Burant, J. C.; Iyengar, S. S.; Tomasi, J.; Cossi, M.; Rega, N.; Millam, J. M.; Klene, M.; Knox, J. E.; Cross, J. B.; Bakken, V.; Adamo, C.; Jaramillo, J.; Gomperts, R.; Stratmann, R. E.; Yazyev, O.; Austin, A. J.; Cammi, R.; Pomelli, C.; Ochterski, J. W.; Martin, R. L.; Morokuma, K.; Zakrzewski, V. G.; Voth, G. A.; Salvador, P.; Dannenberg, J. J.; Dapprich, S.; Daniels, A. D.; Farkas, Ö.; Foresman, J. B.; Ortiz, J. V.; Cioslowski, J.; Fox, D. J. Gaussian 09, Revision D.01; Gaussian, Inc.: Wallingford, CT, 2009.

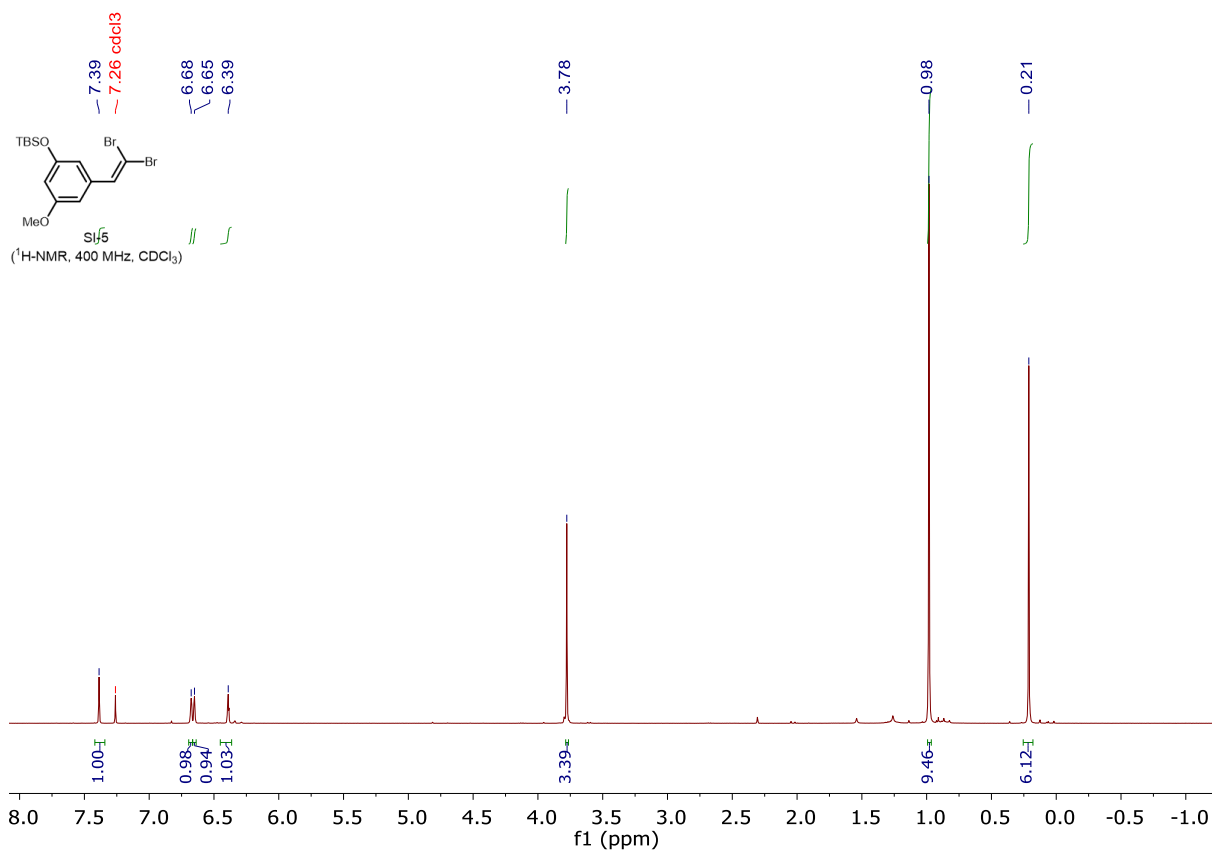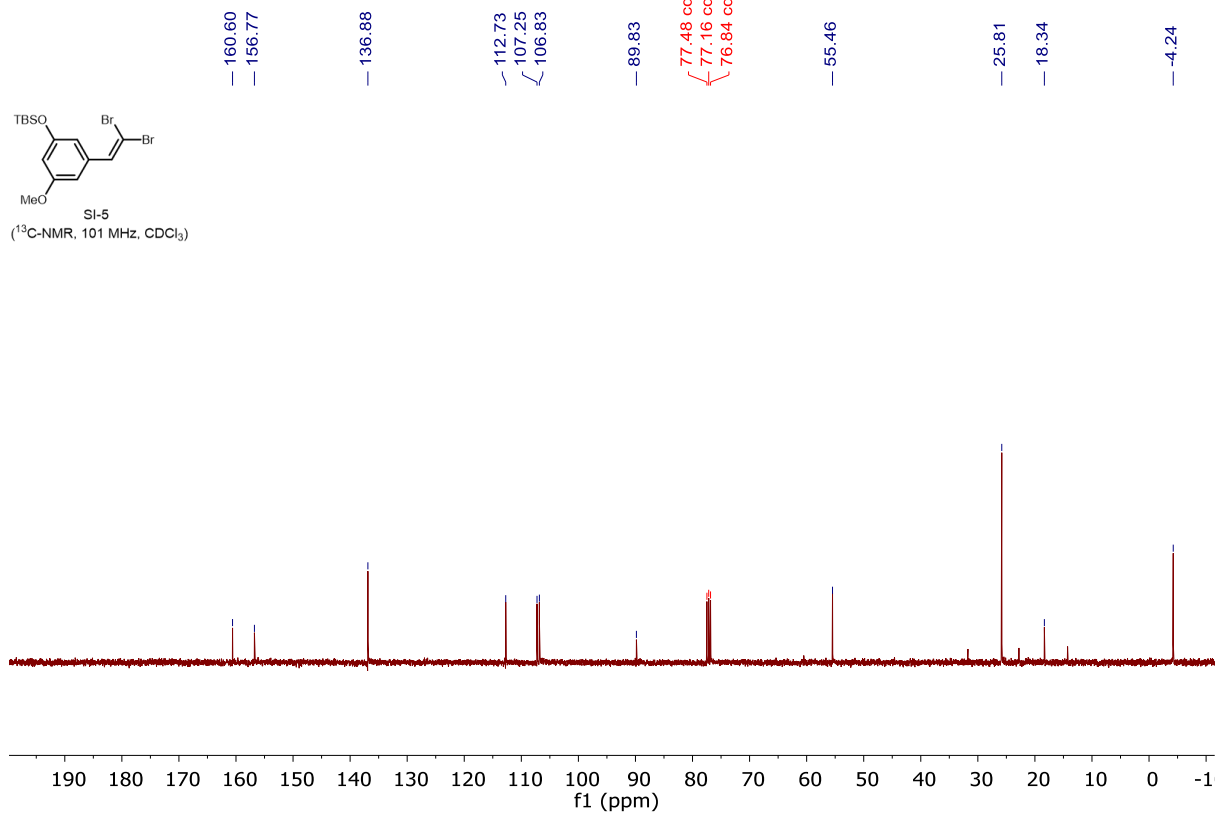

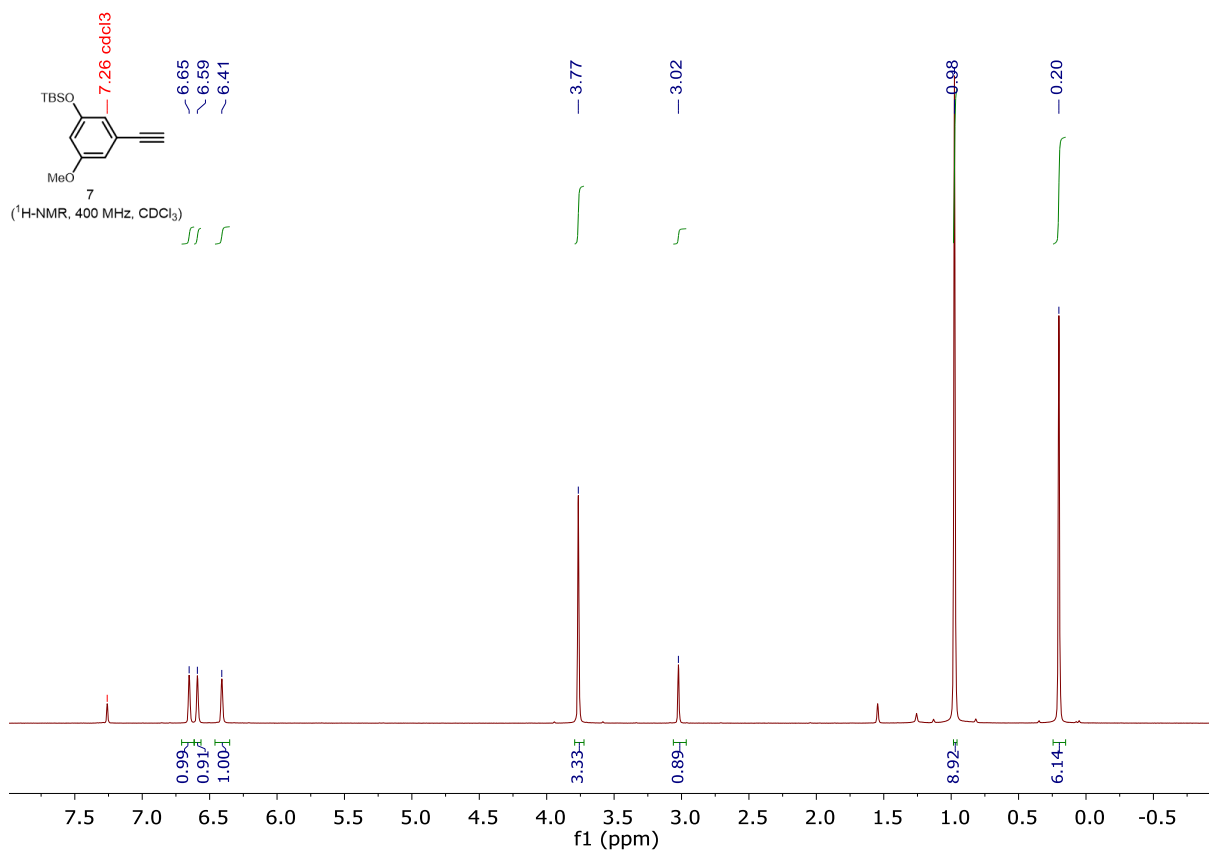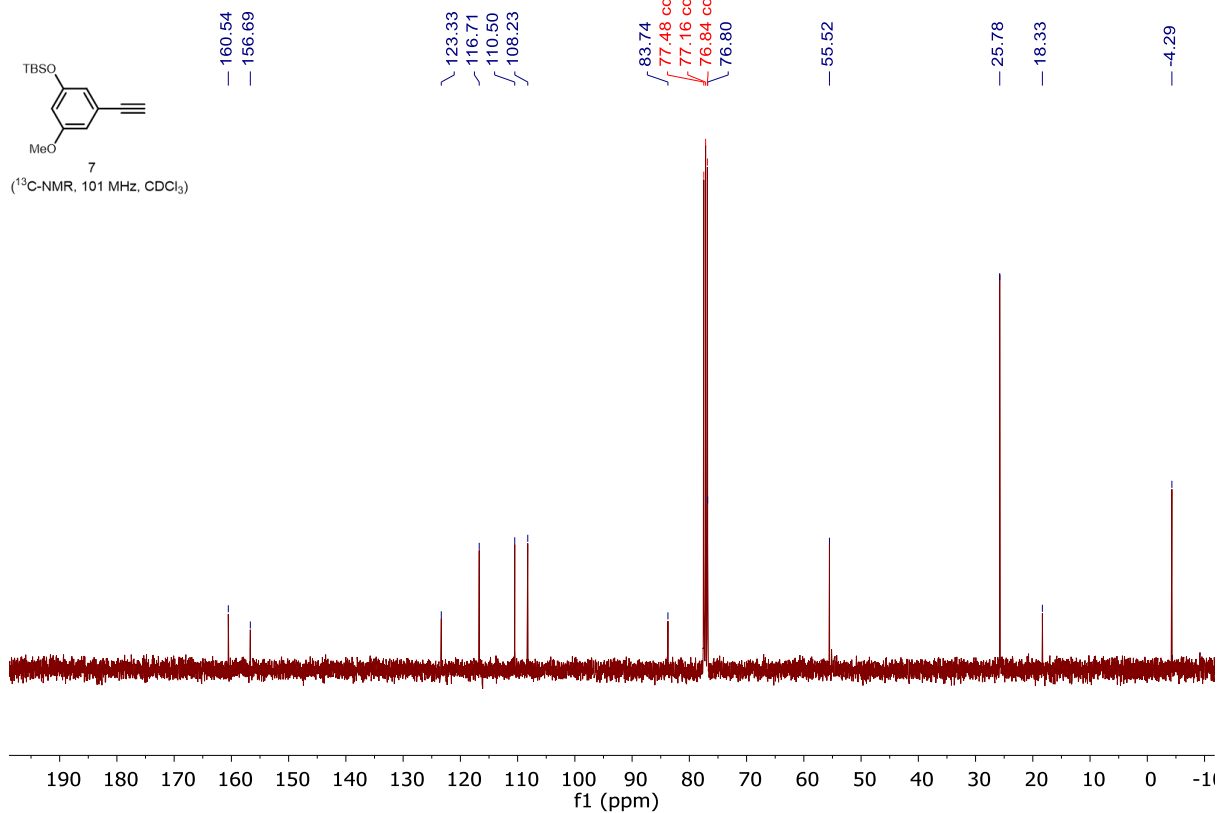

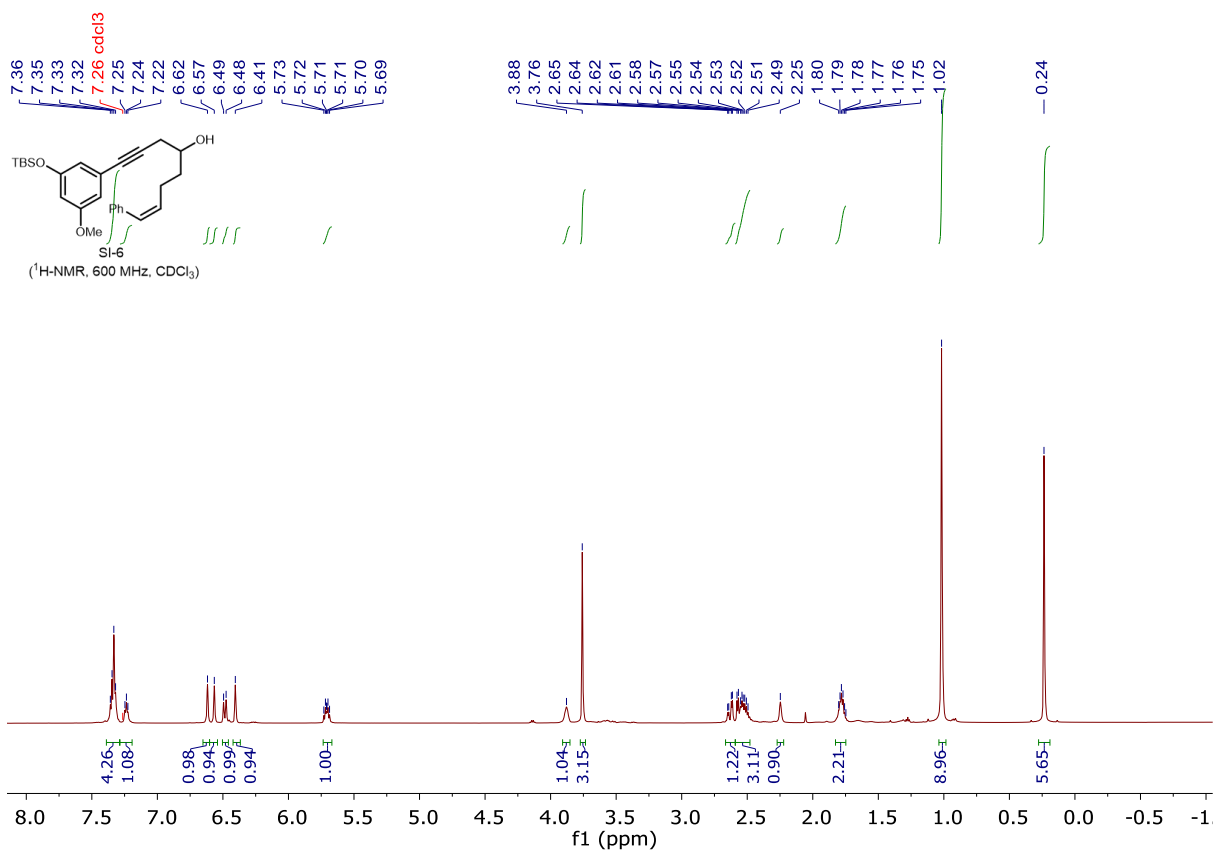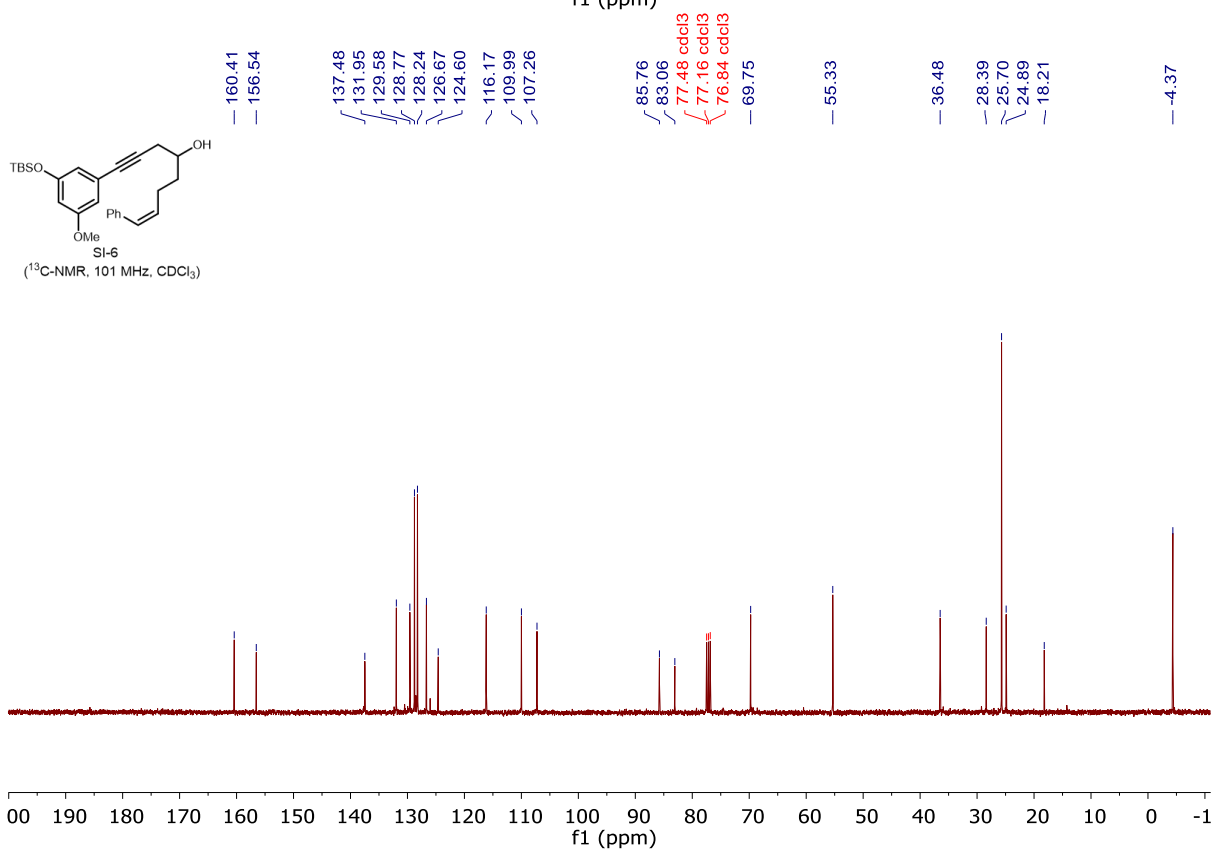

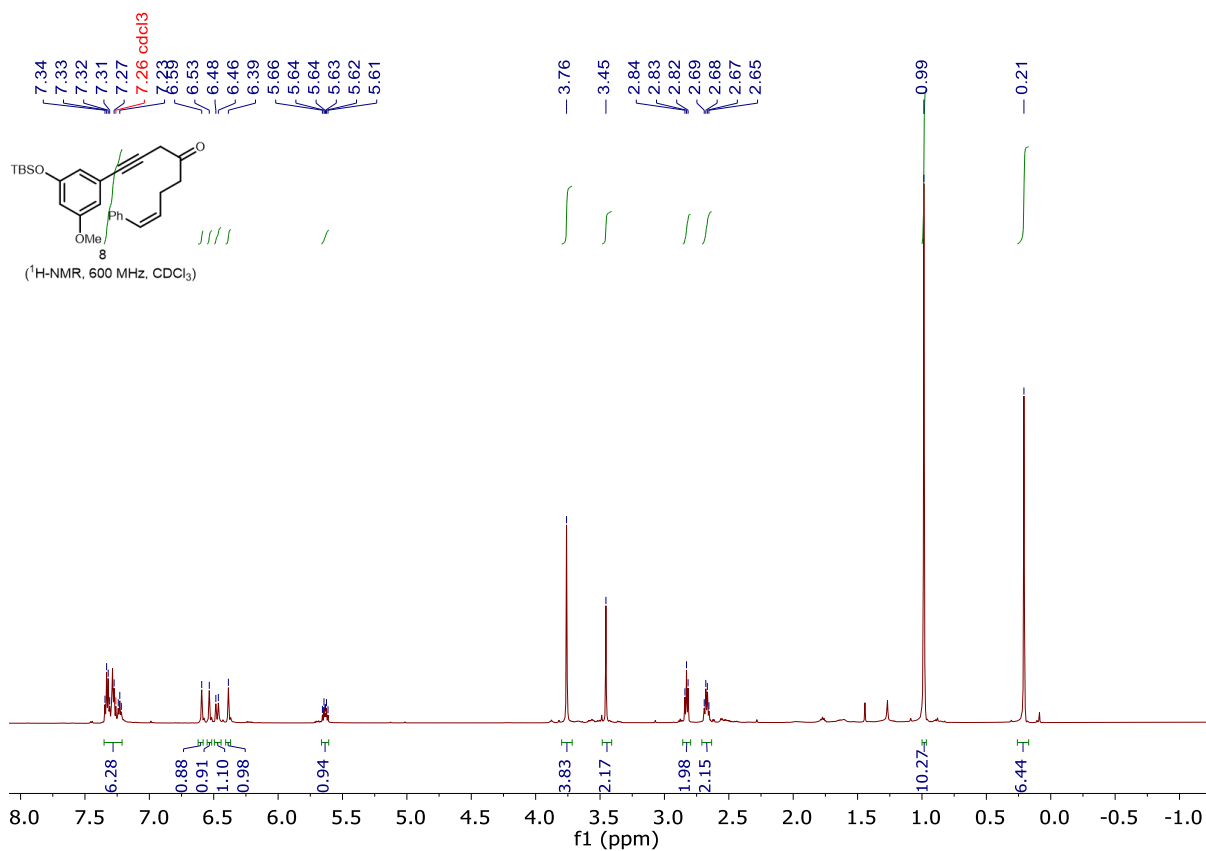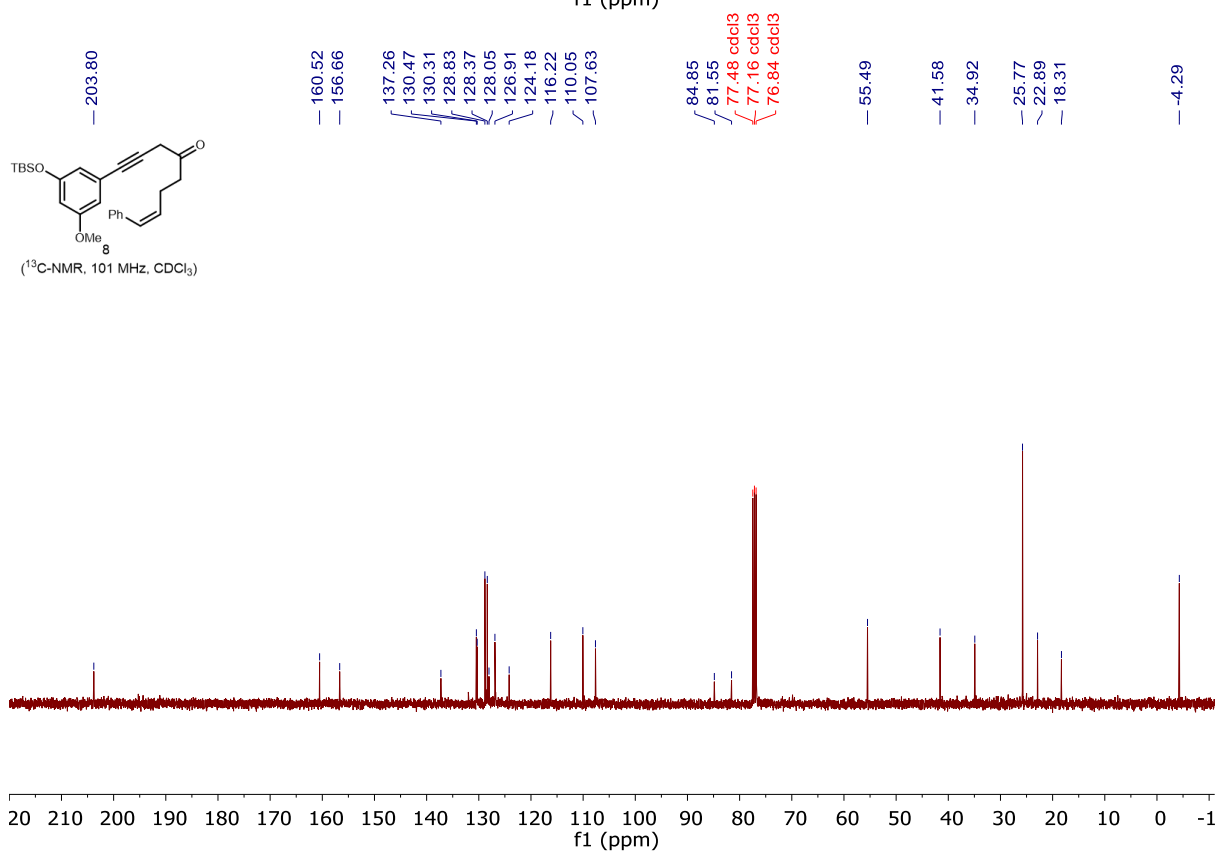

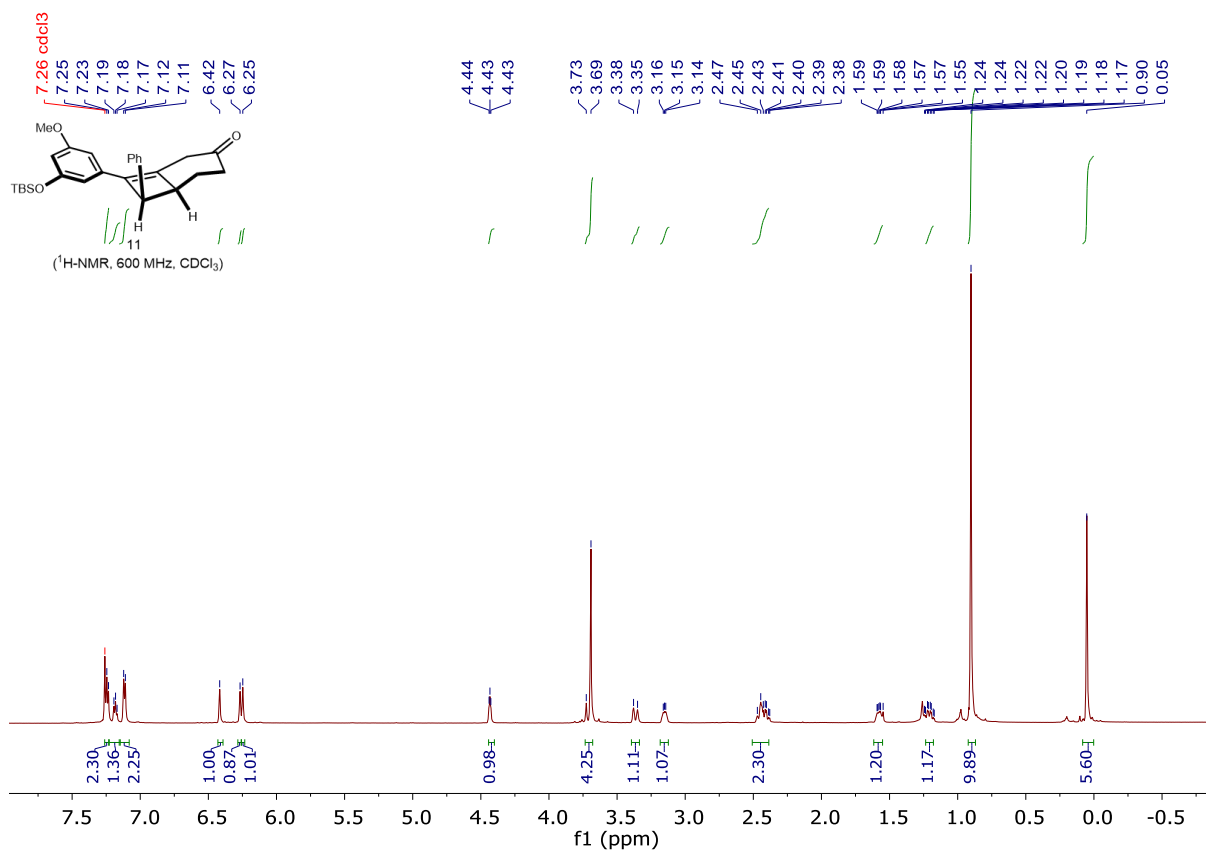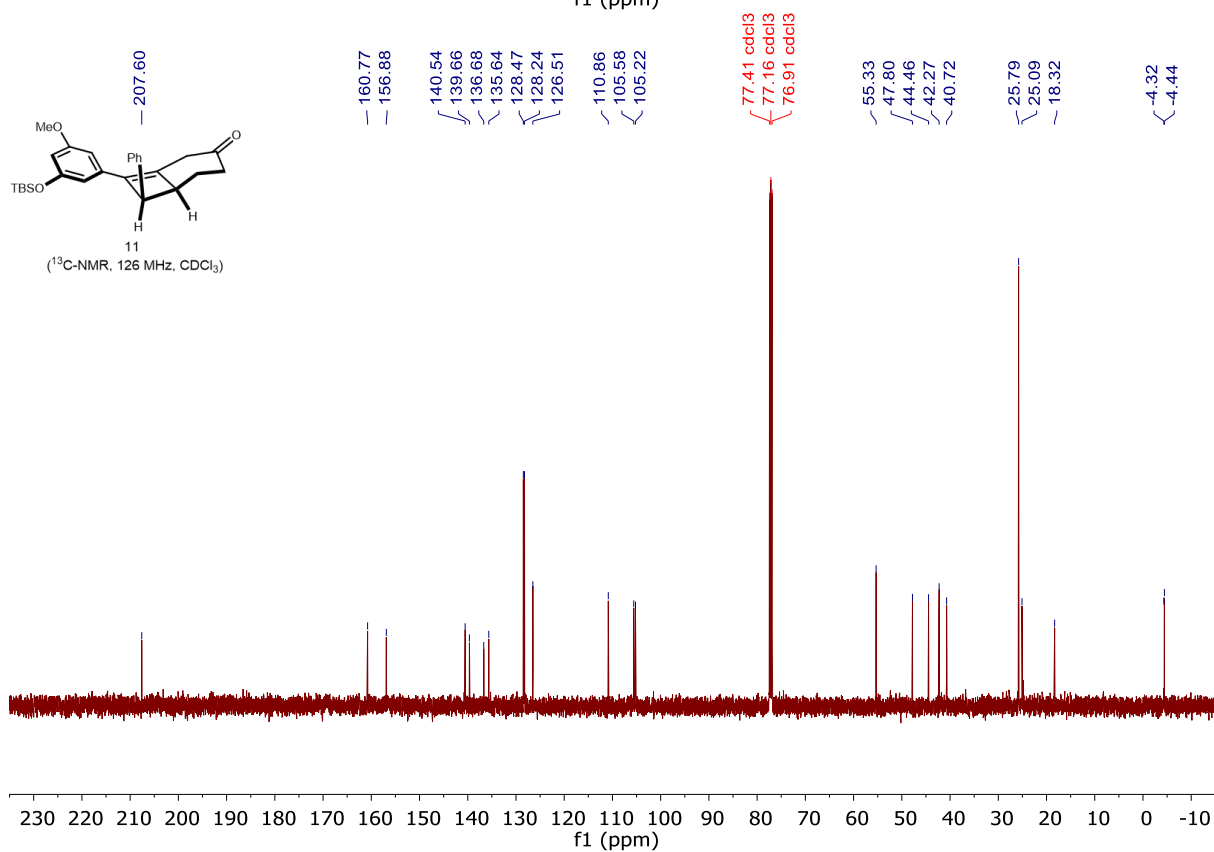



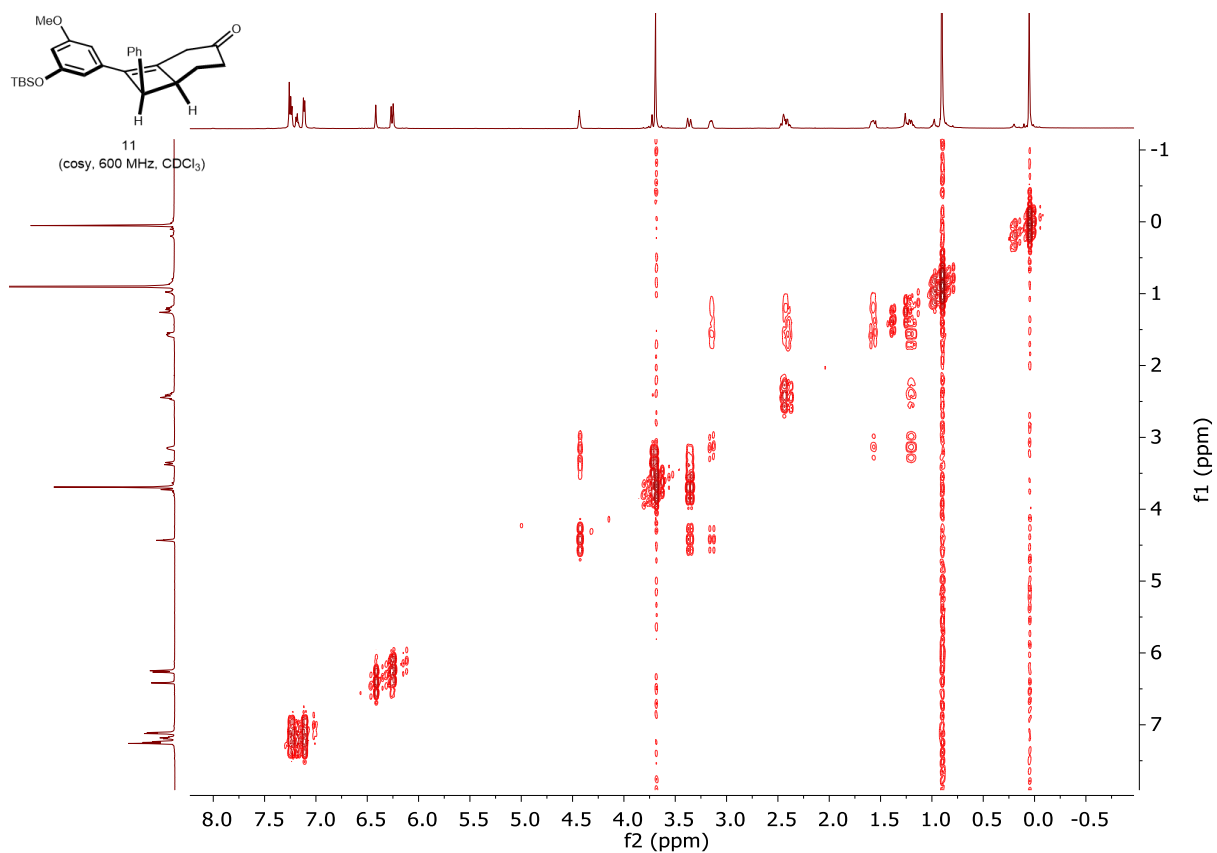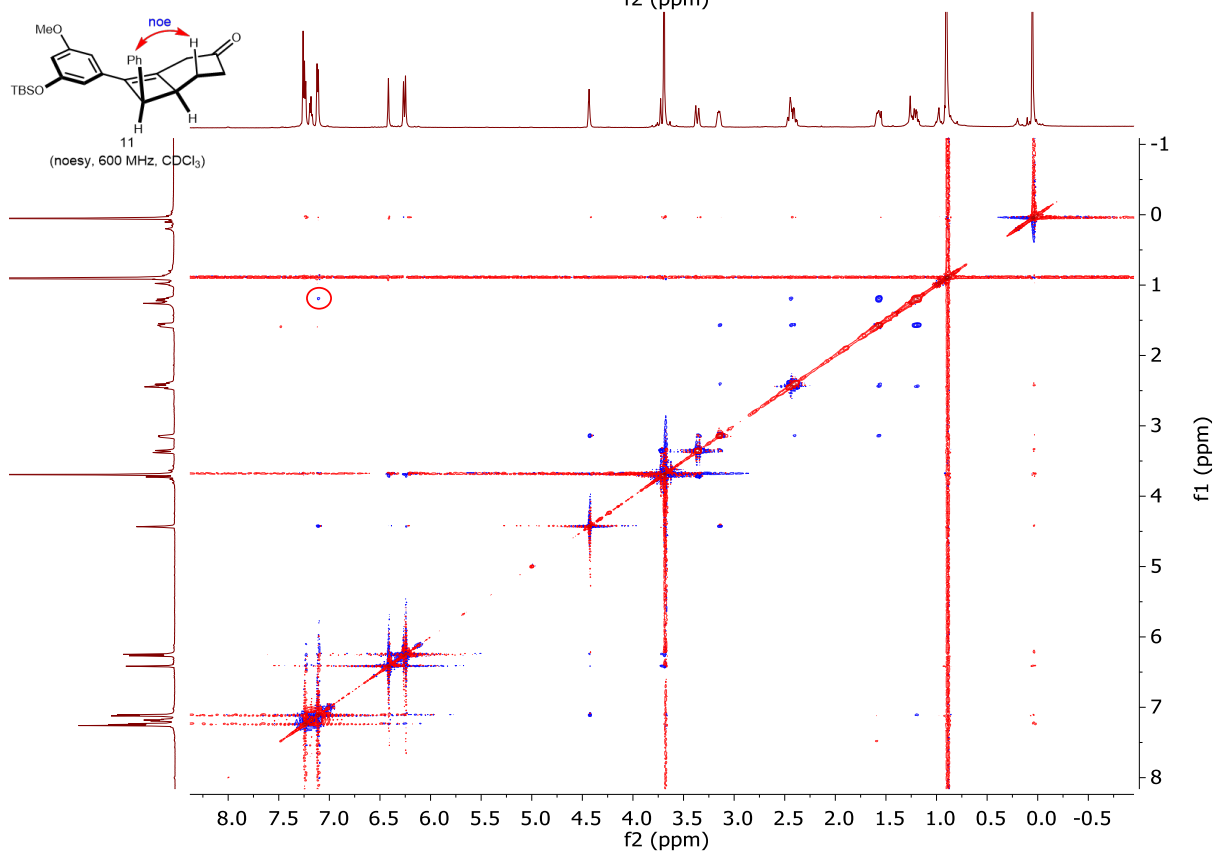





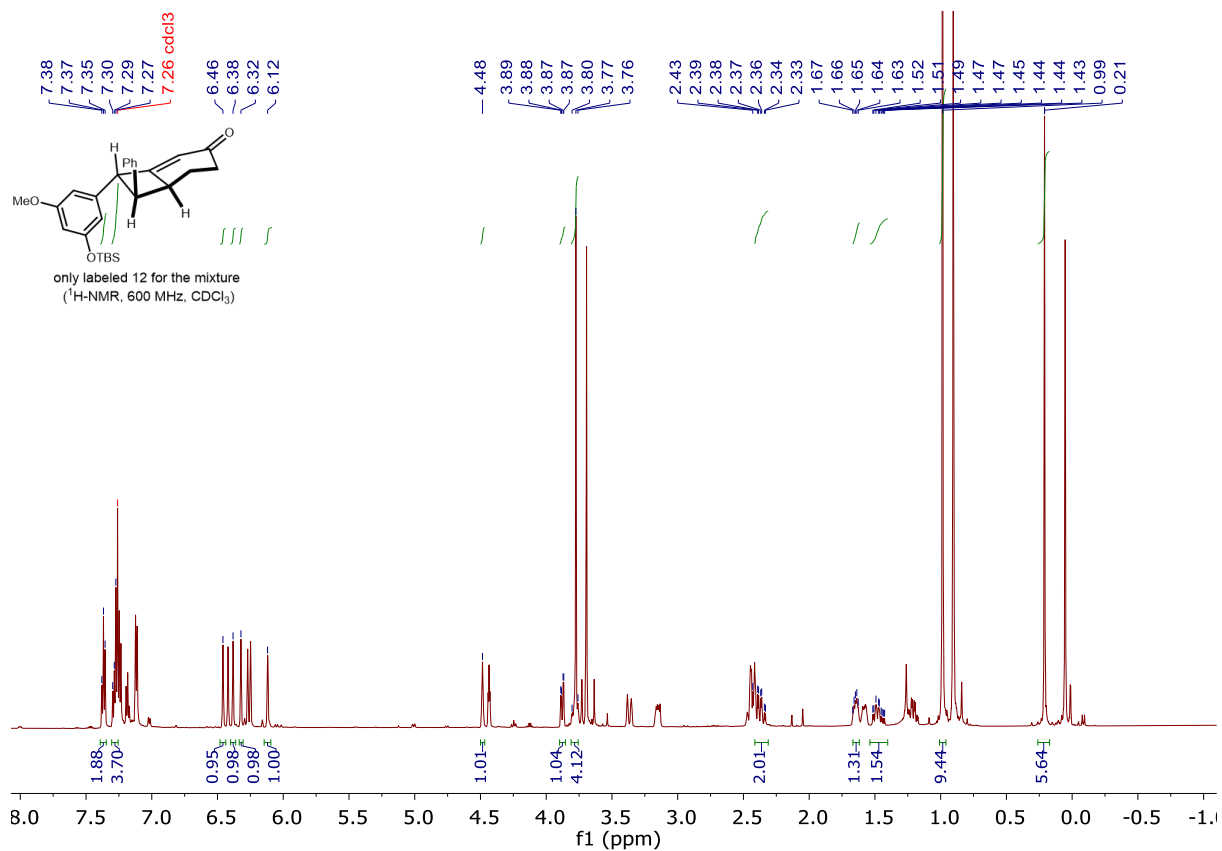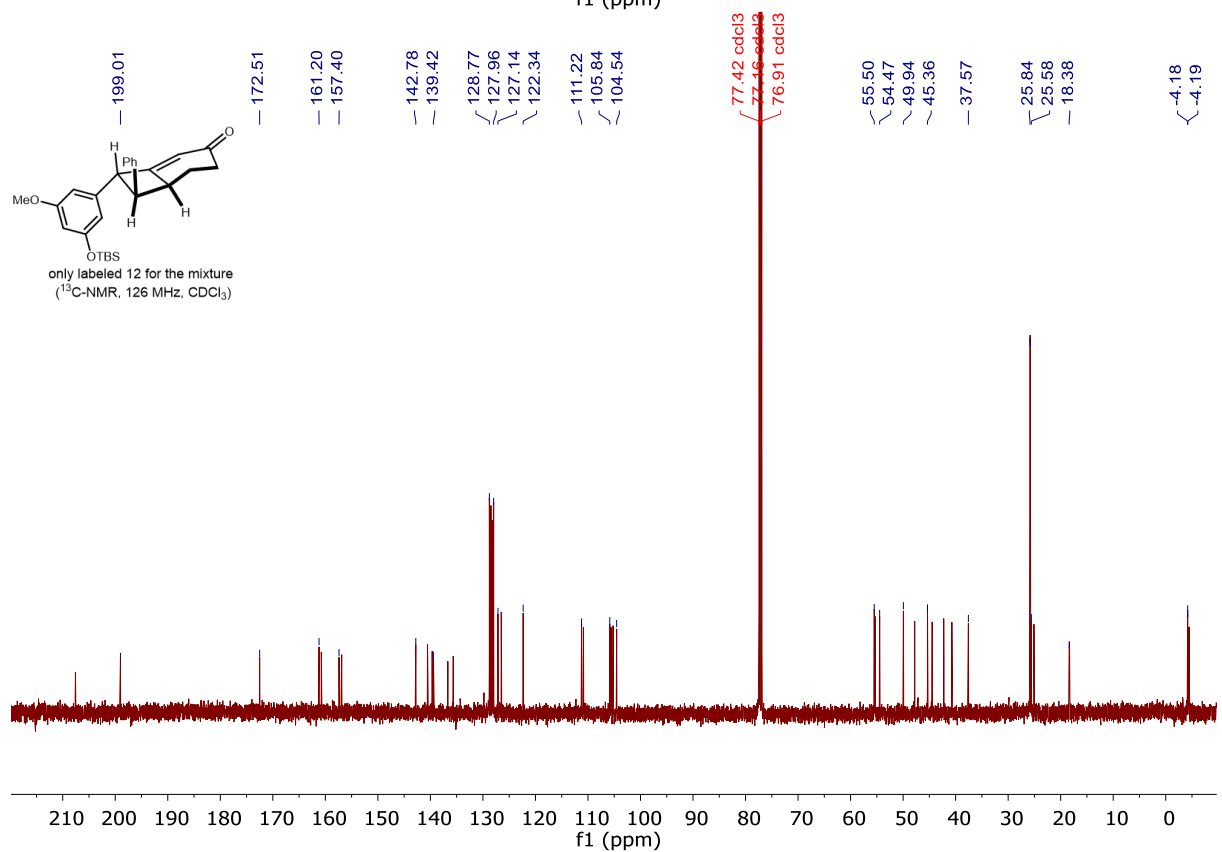

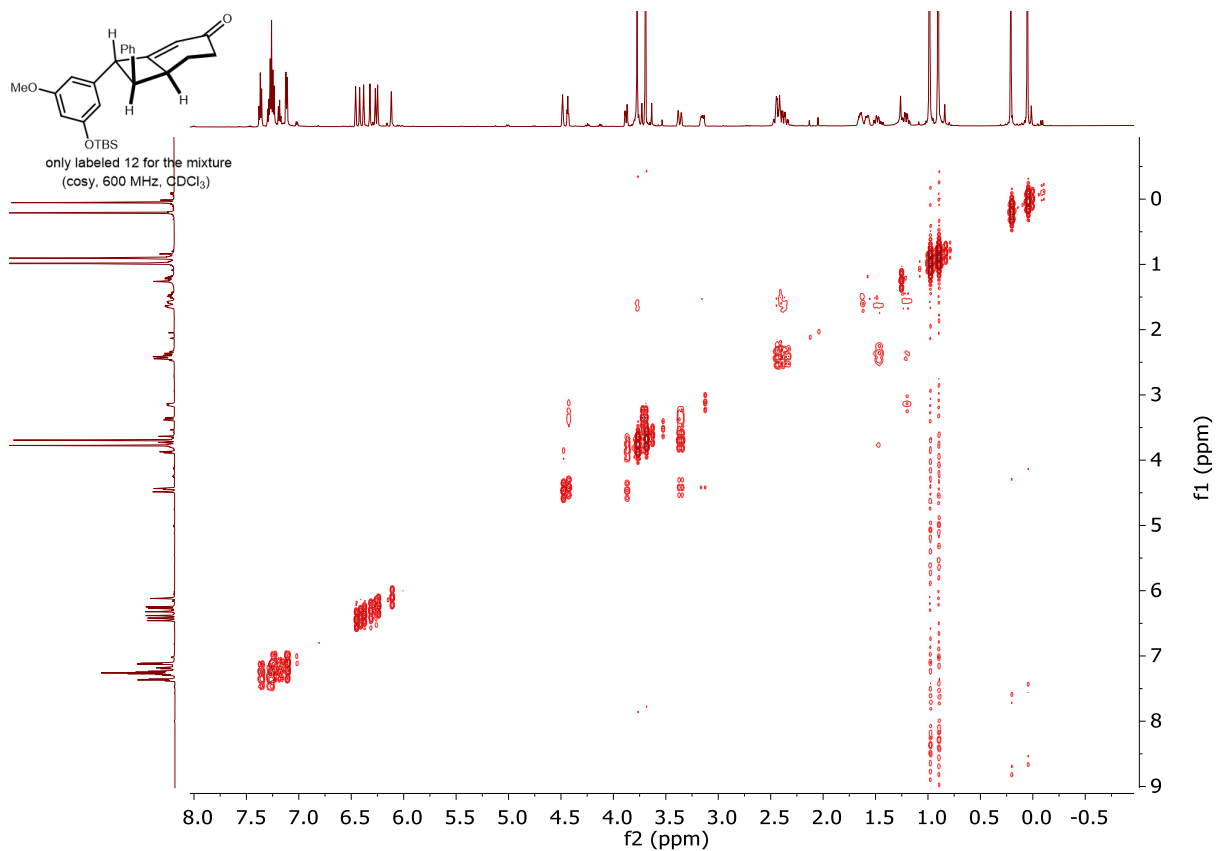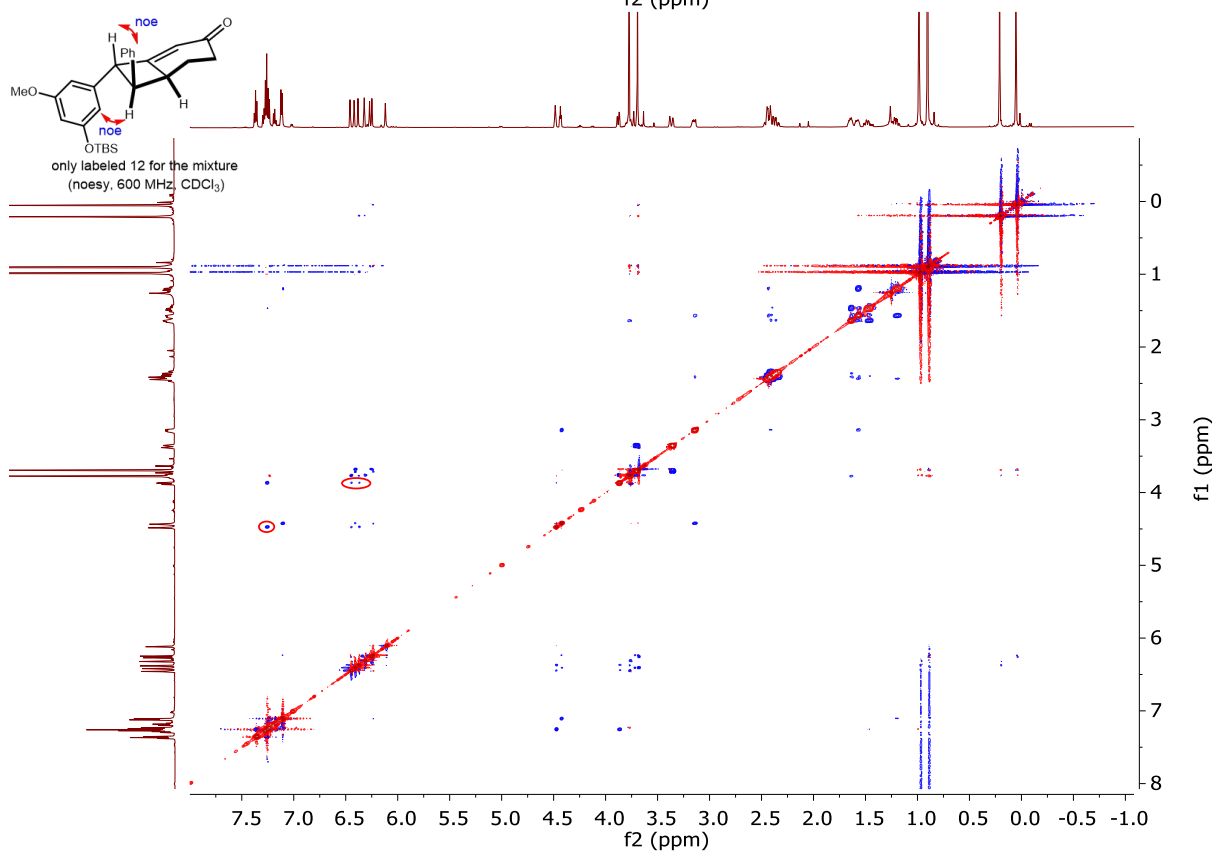

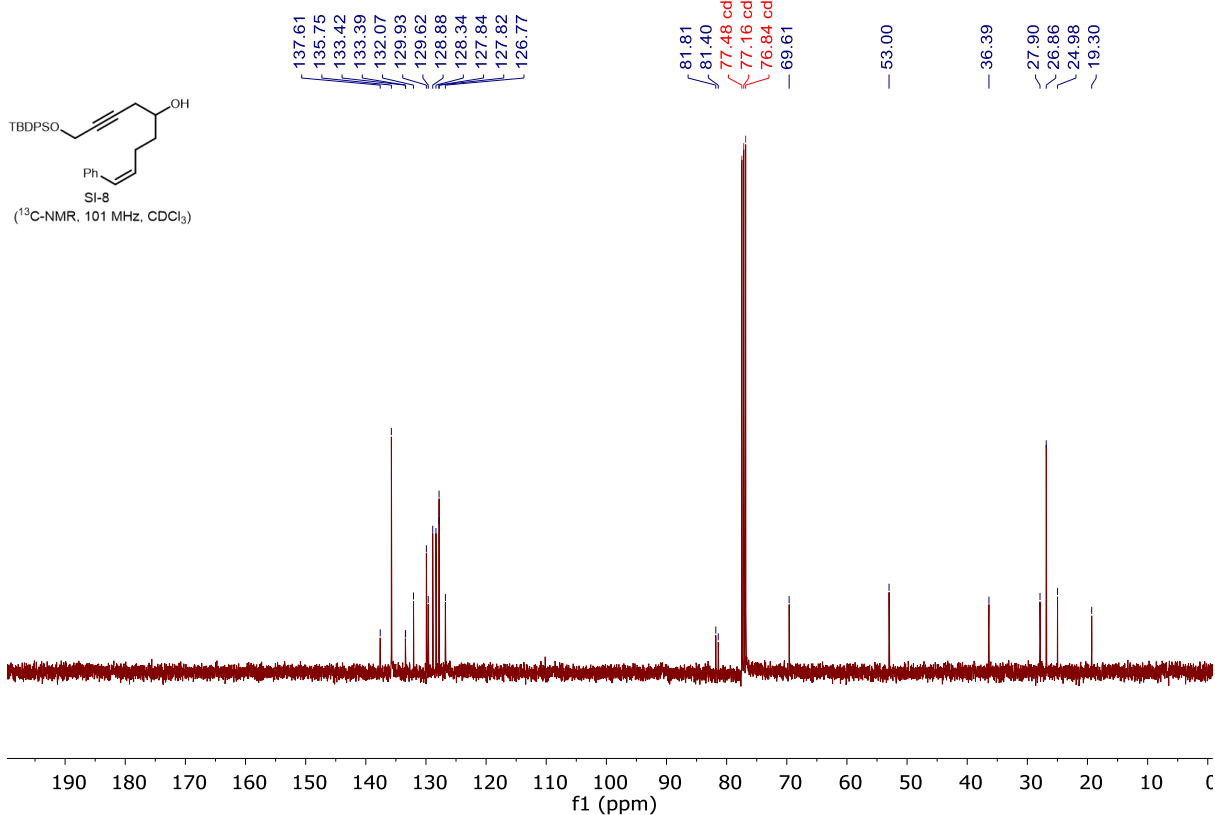



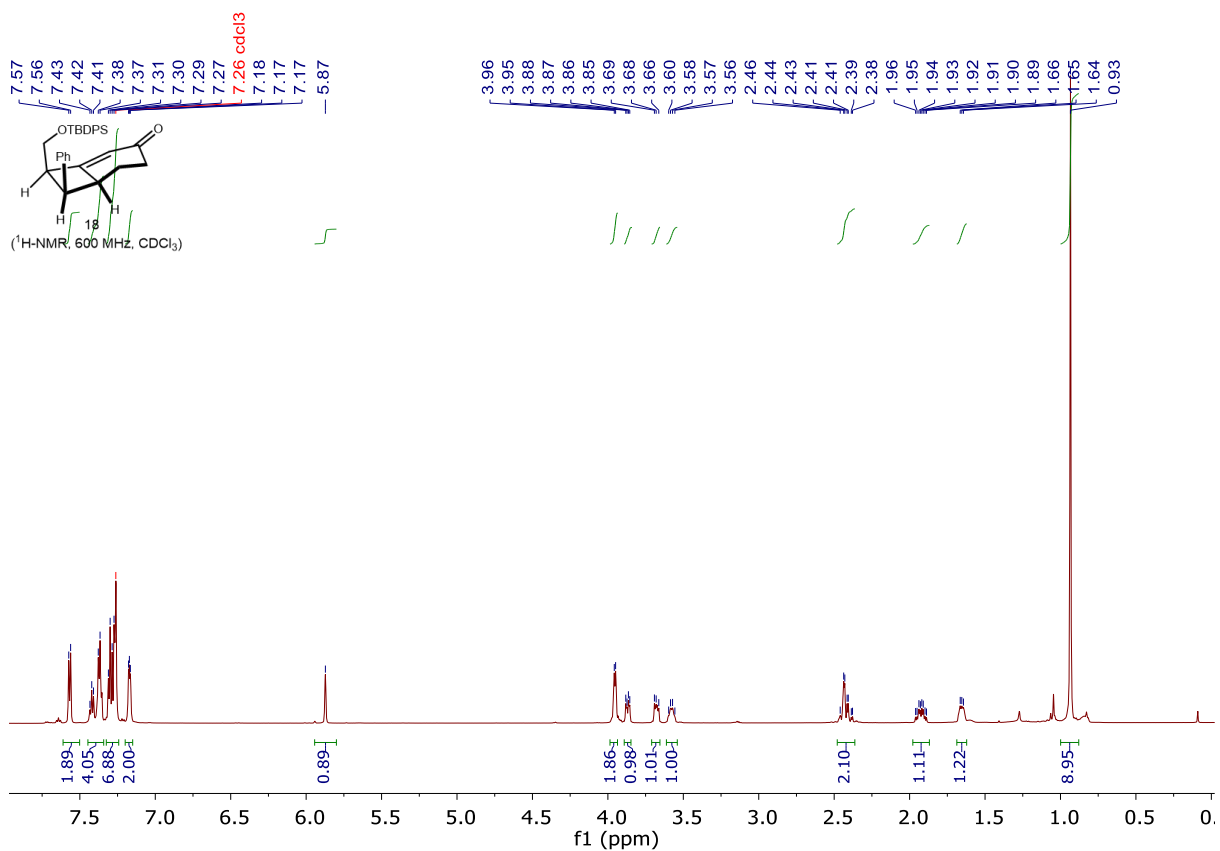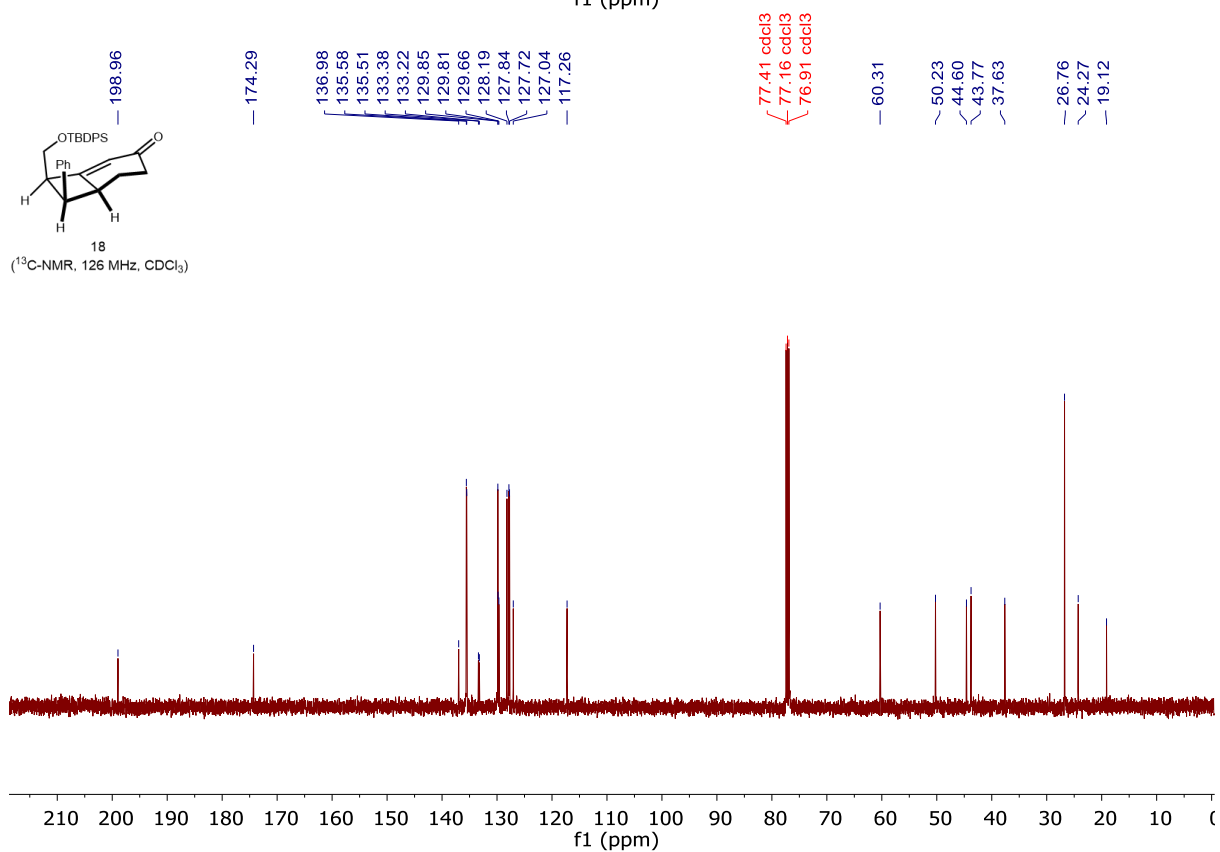



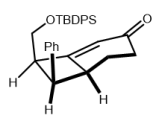

18  
(cosy, 600 MHz, CDCl<sub>3</sub>)

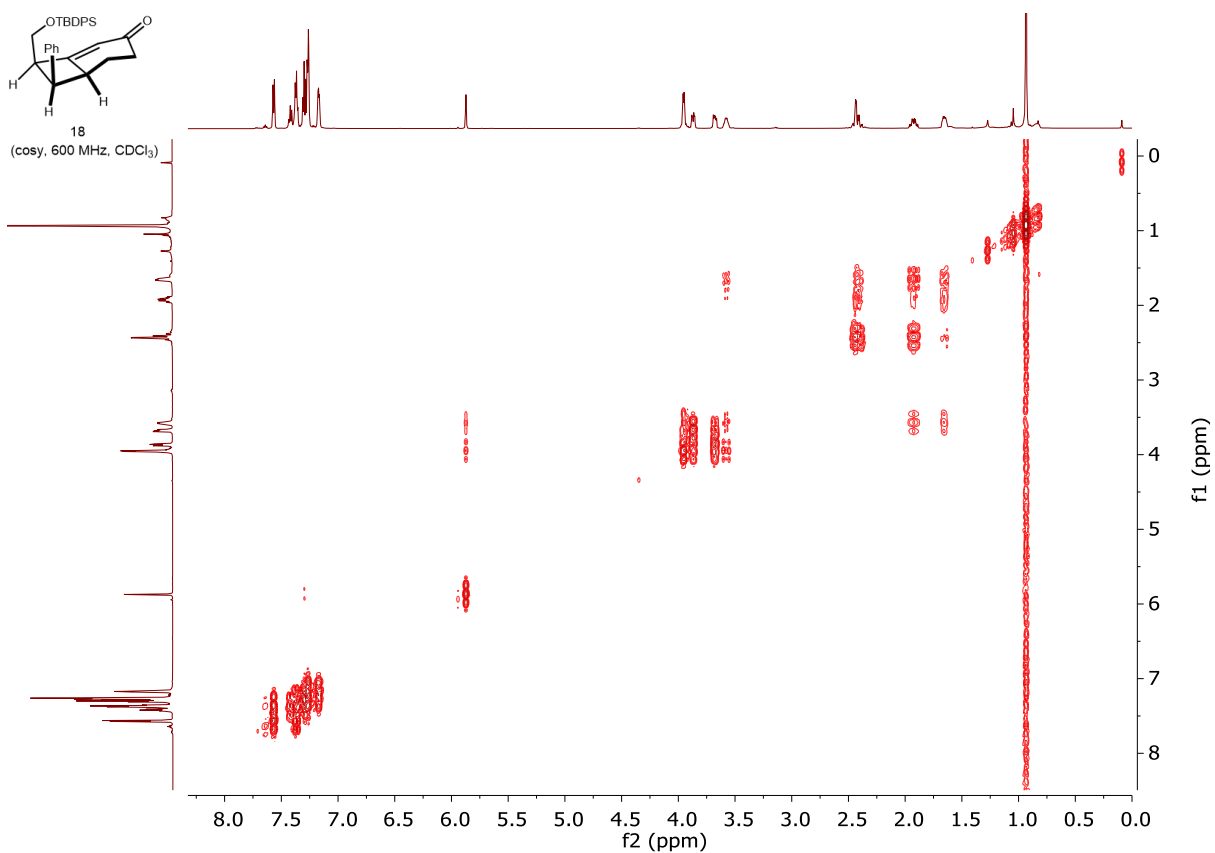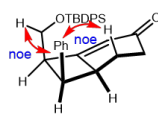

18  
(noesy, 600 MHz, CDCl<sub>3</sub>)

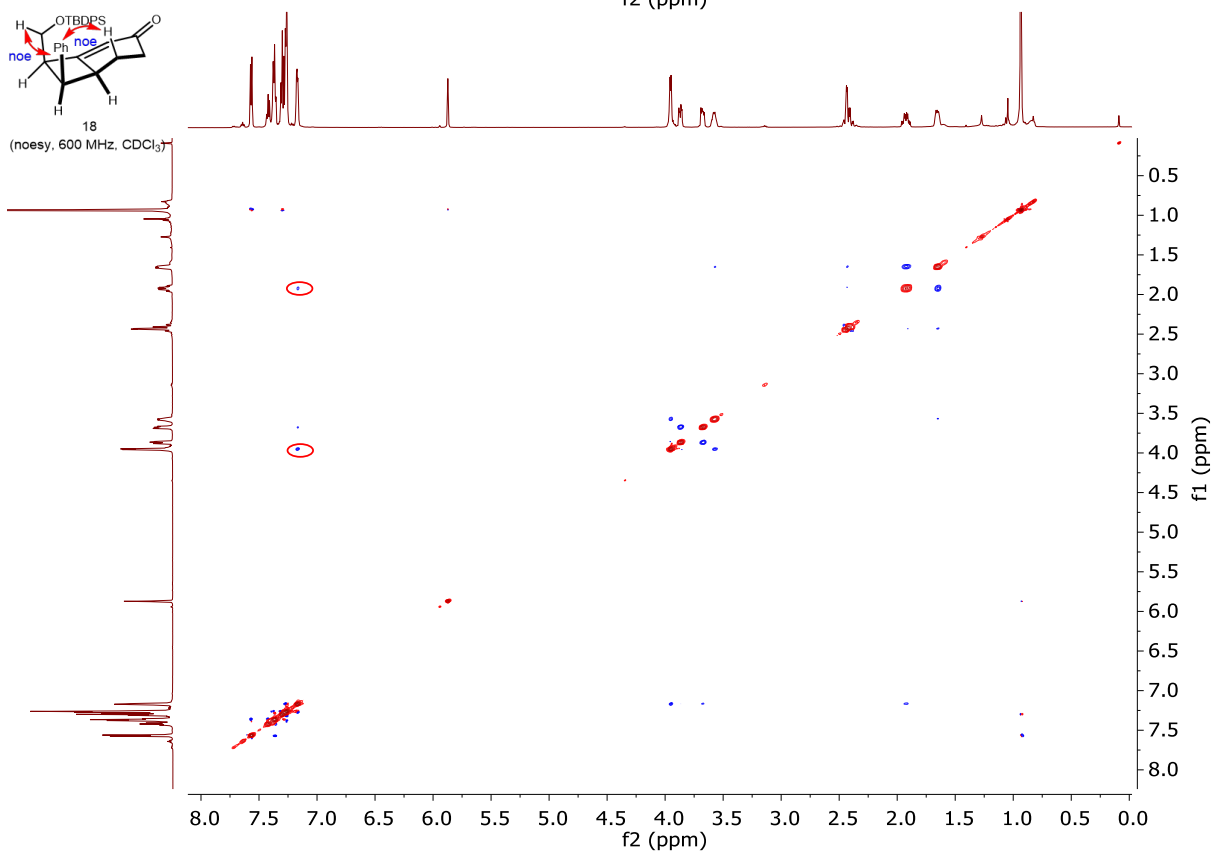

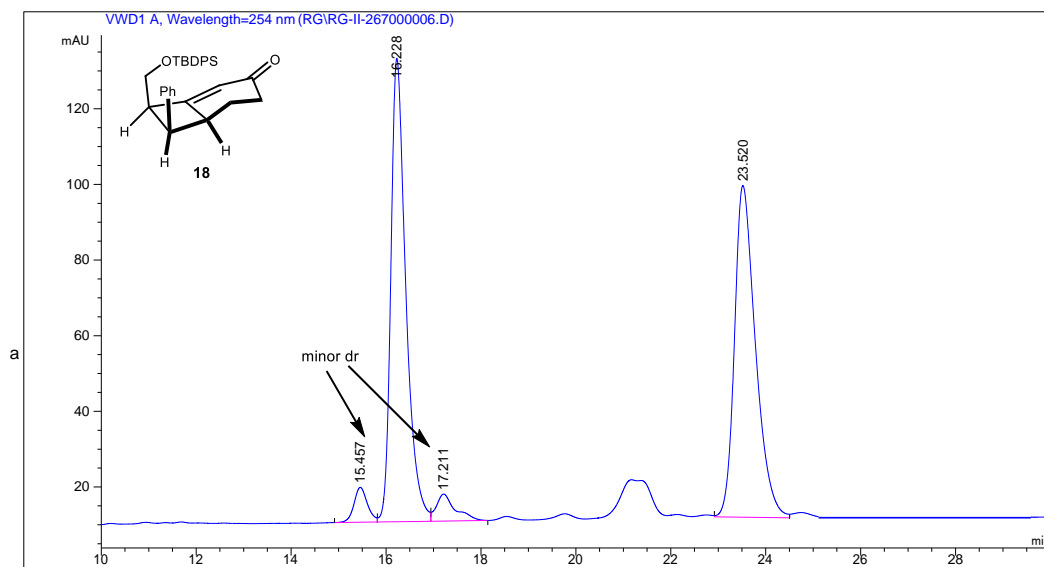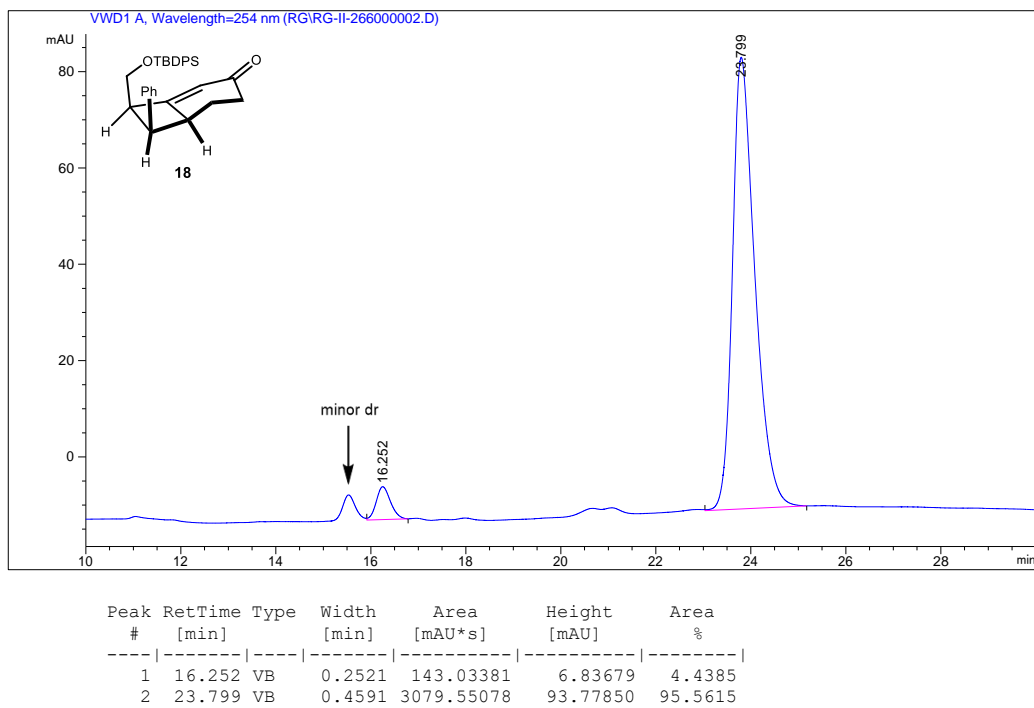

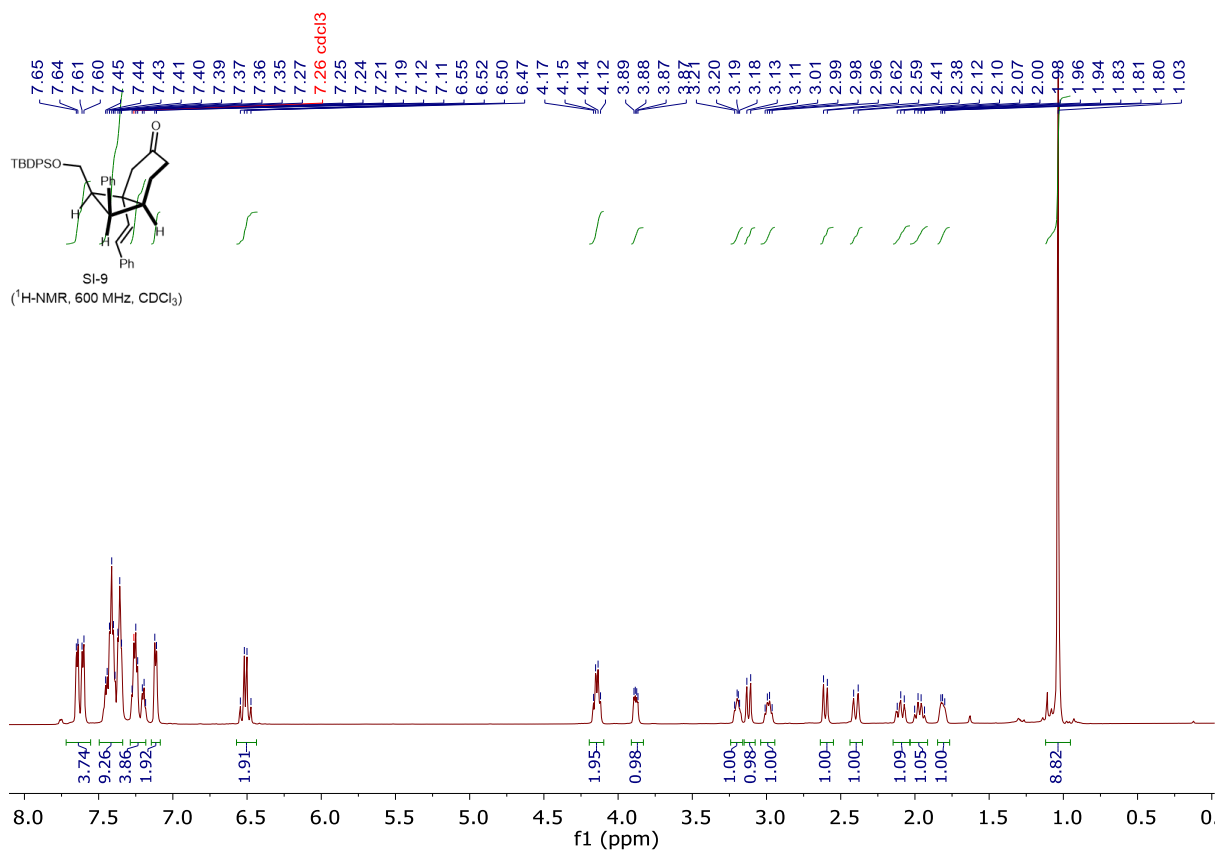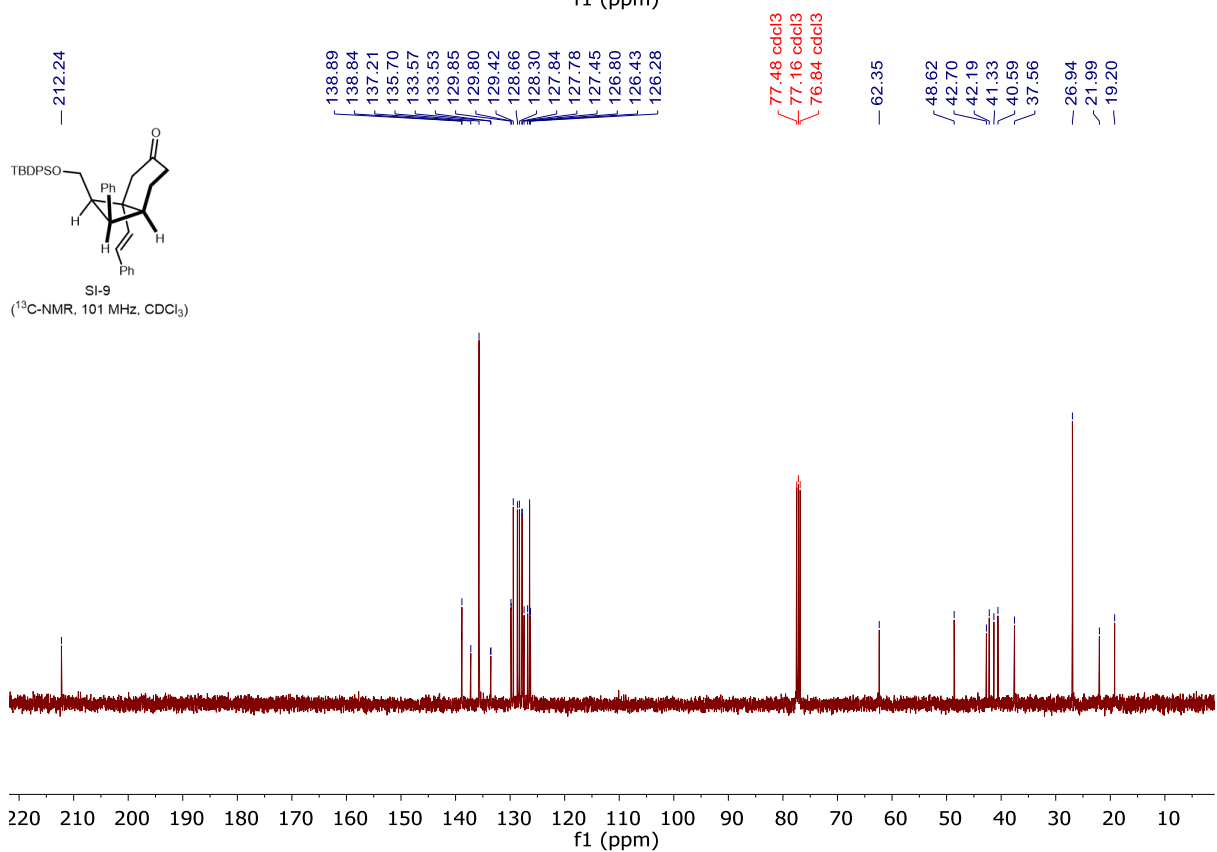

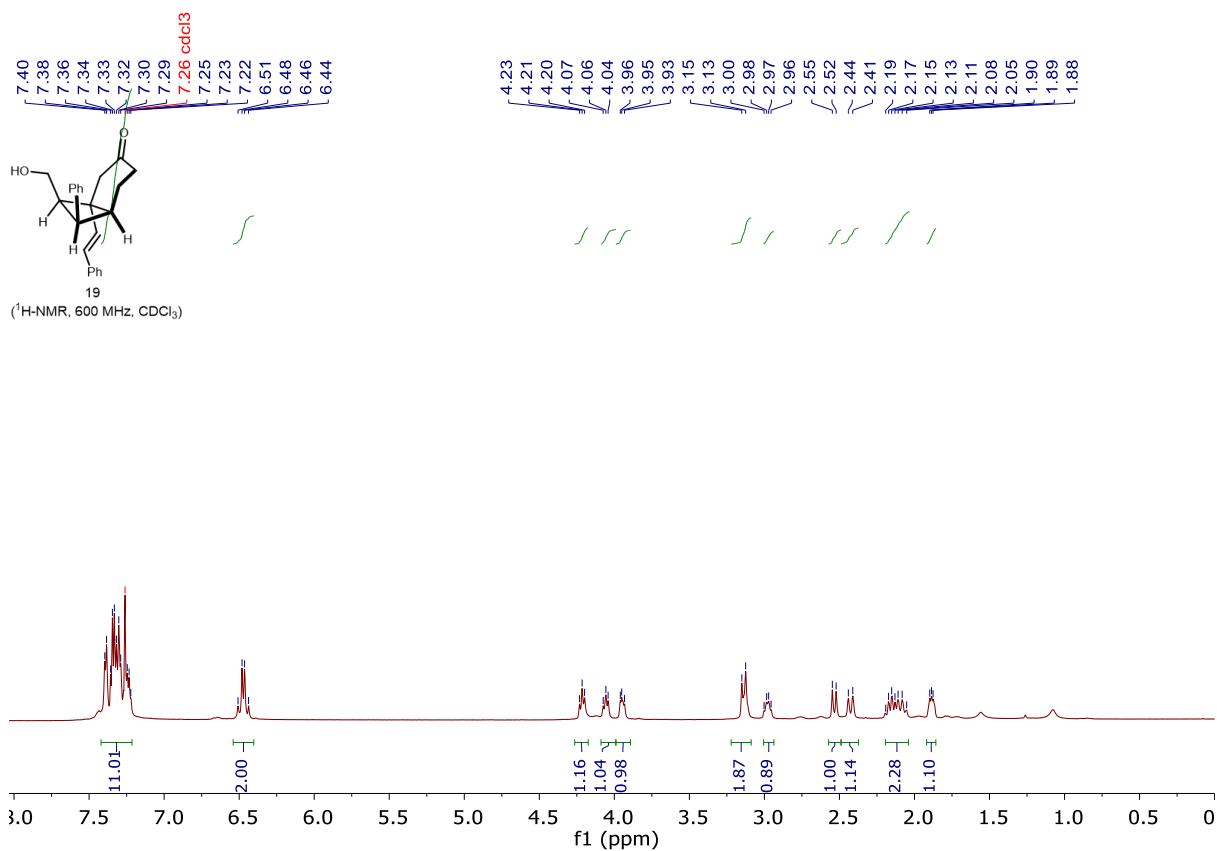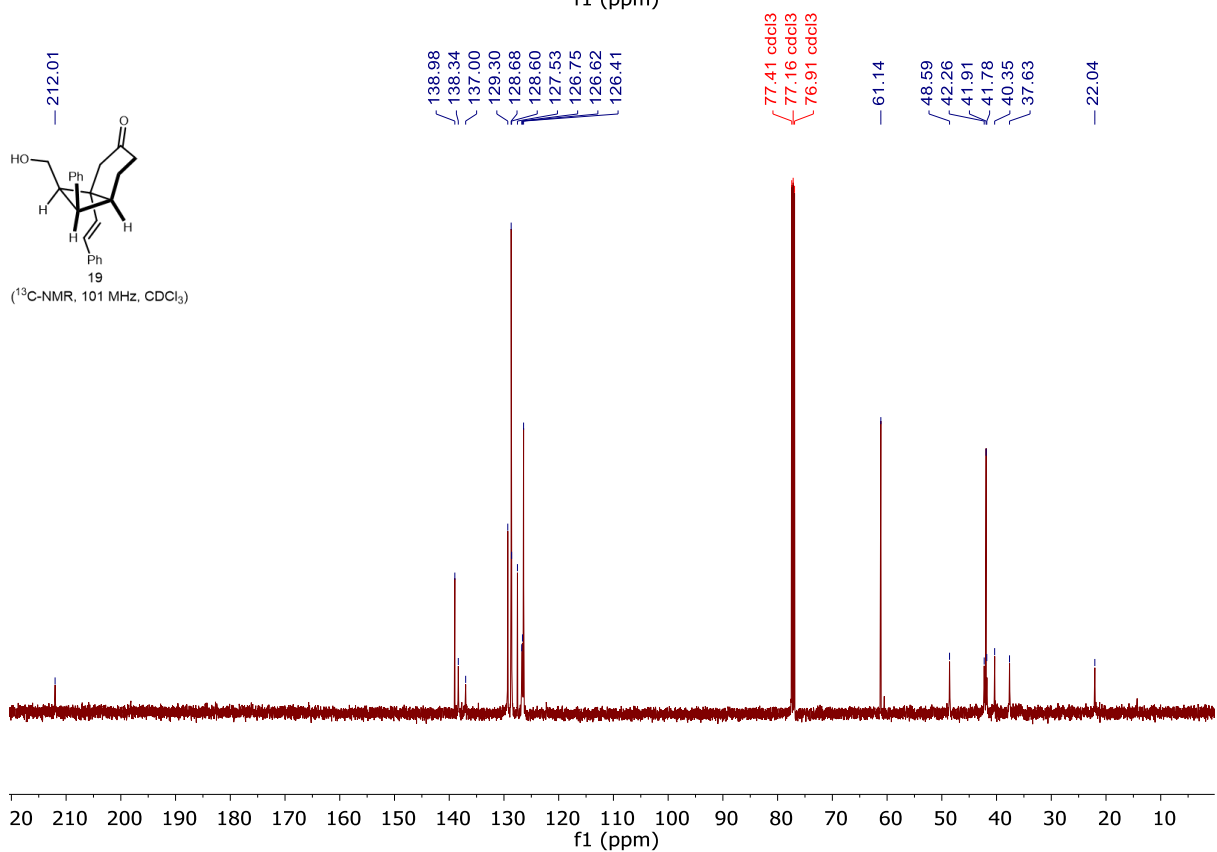

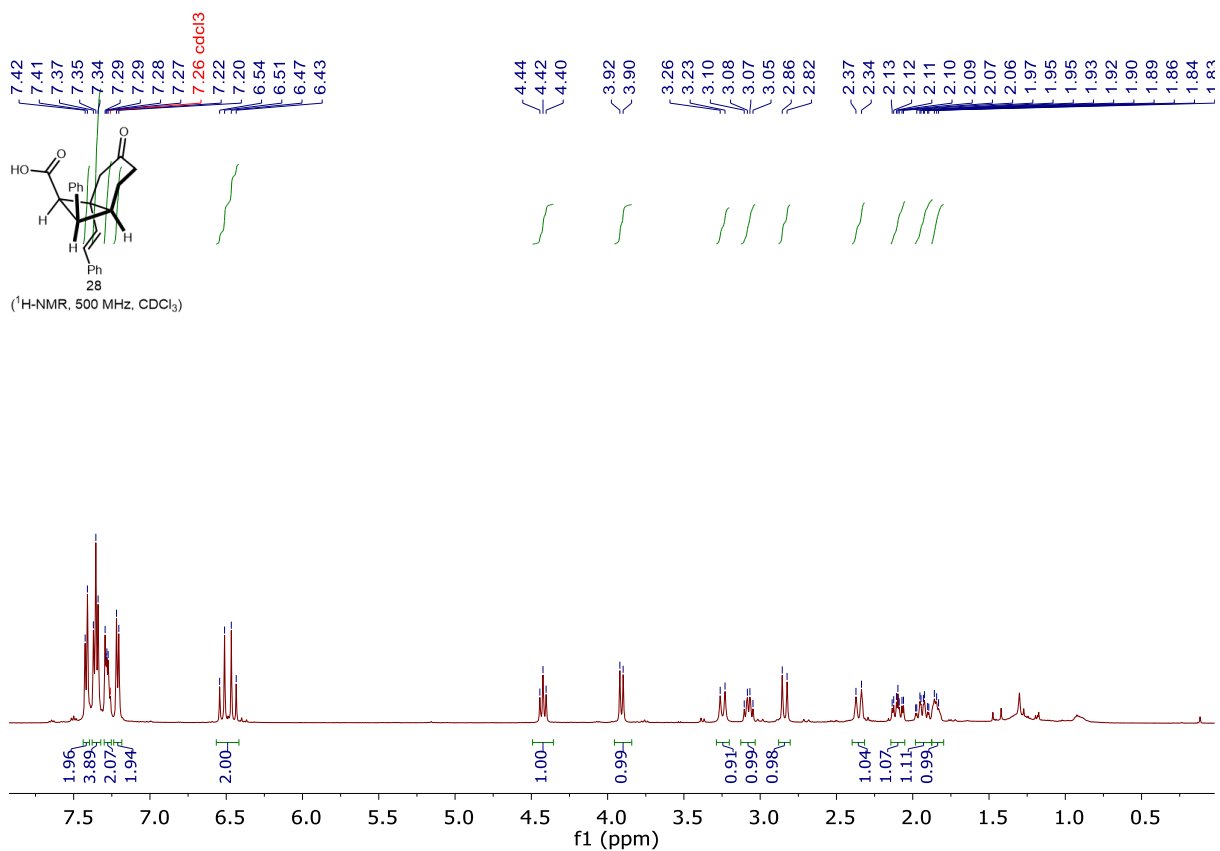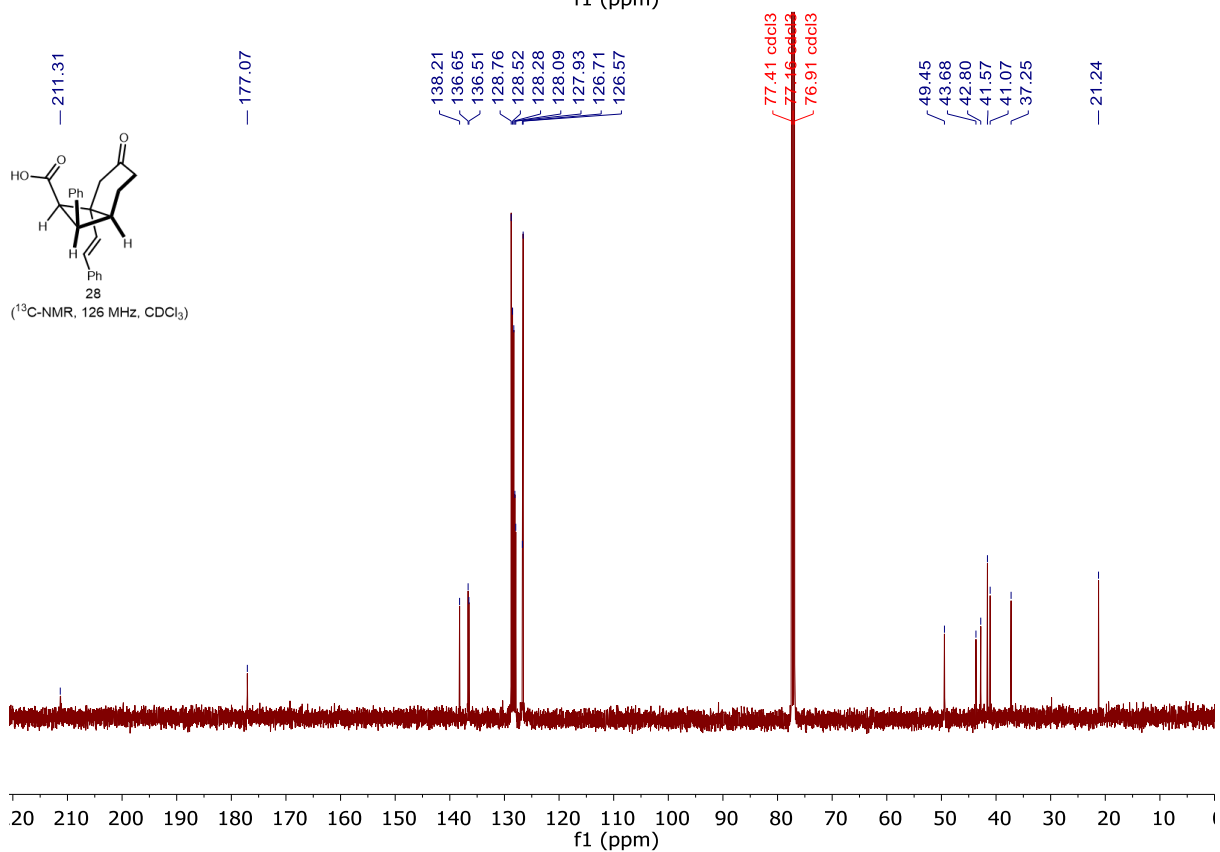

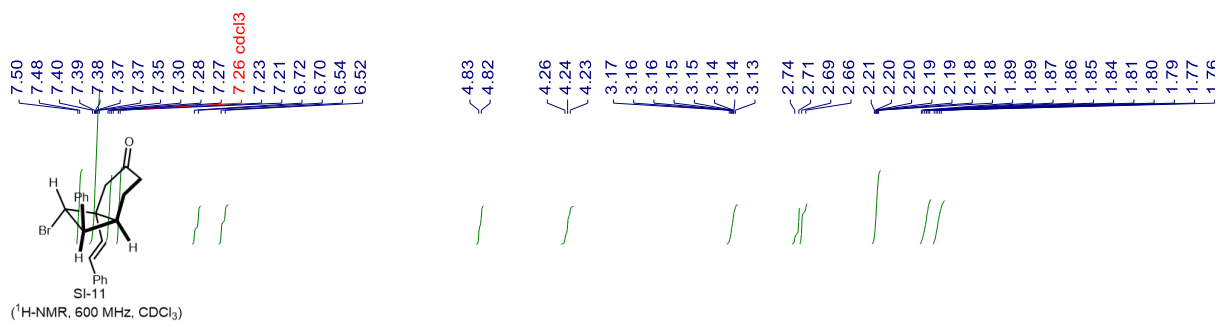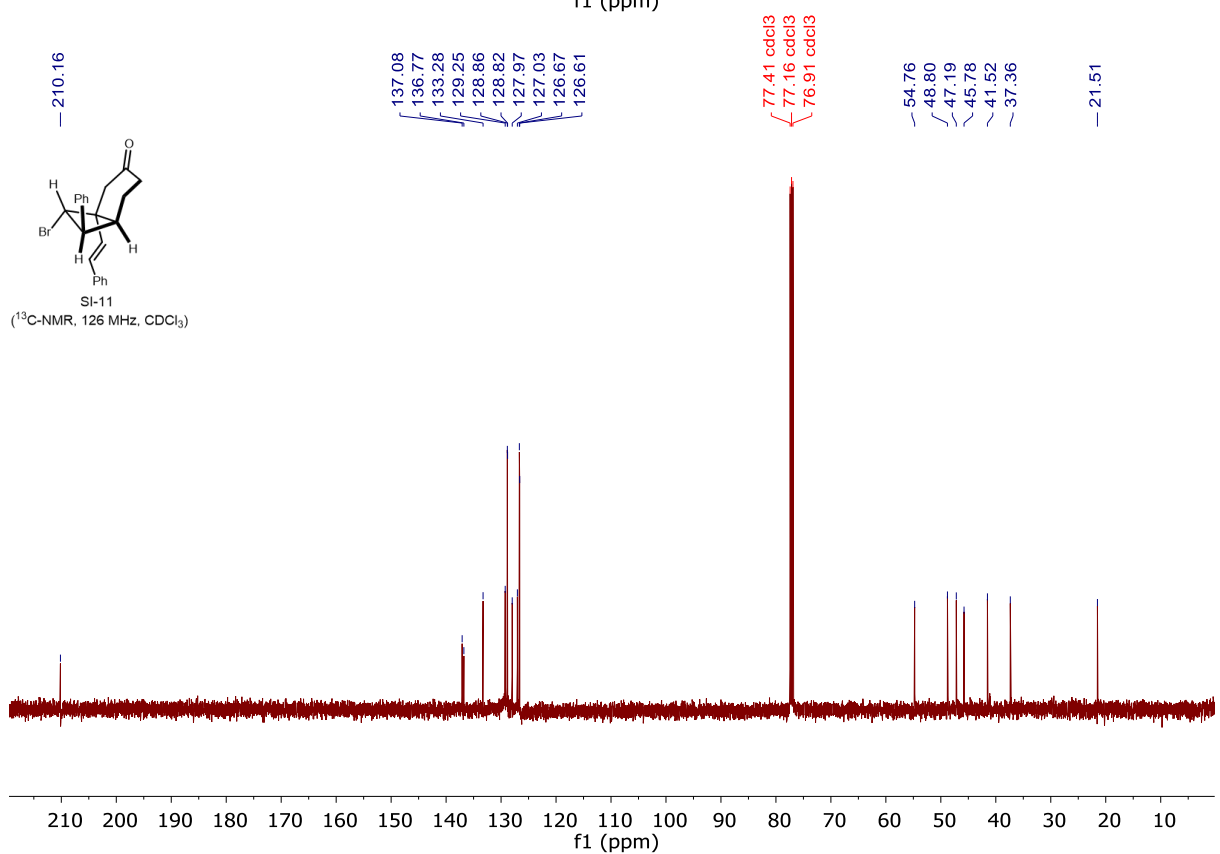

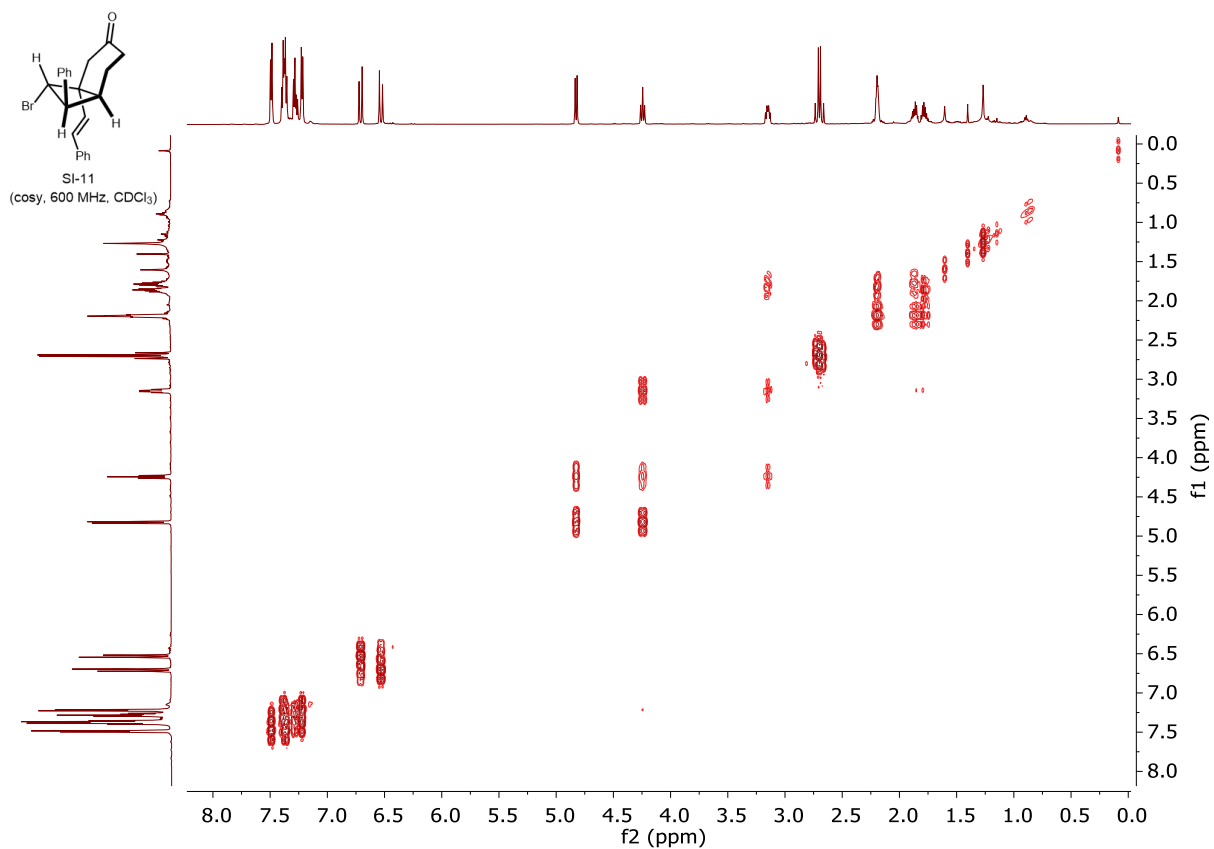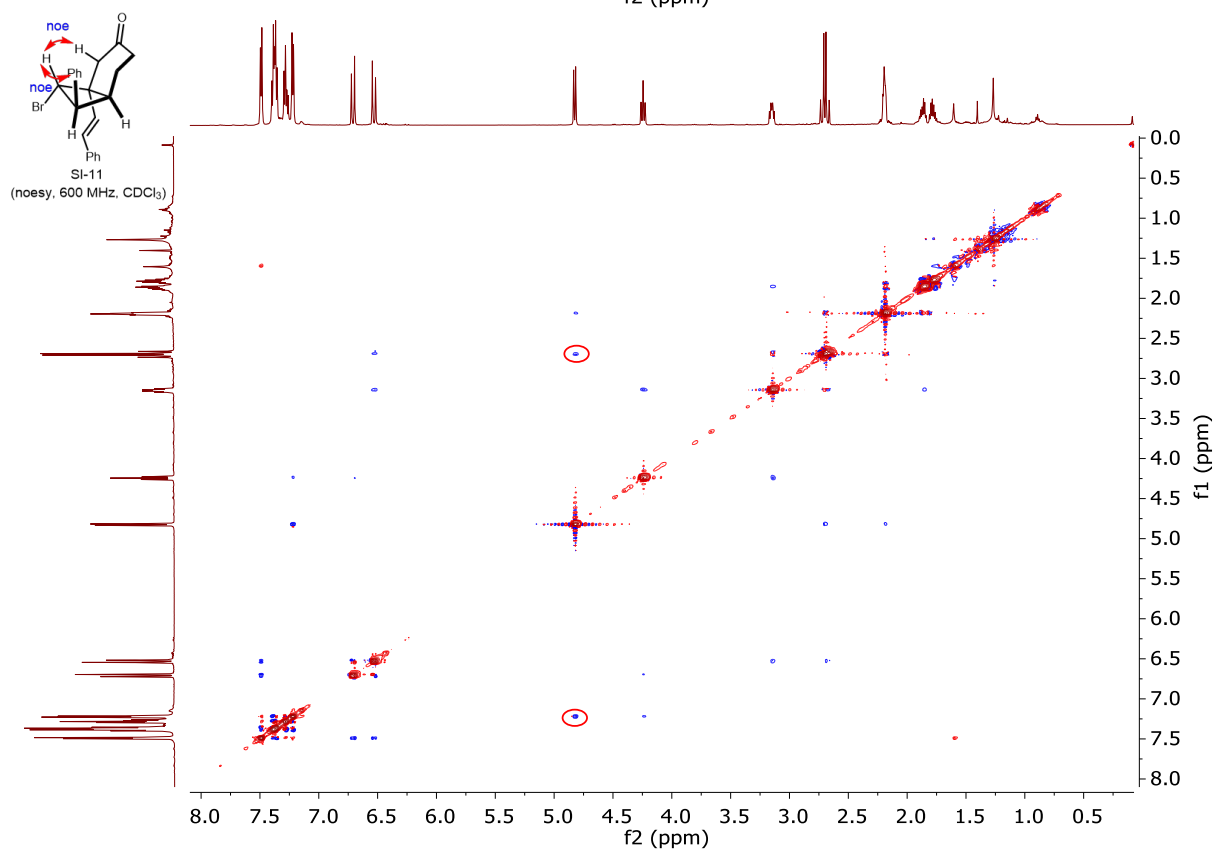

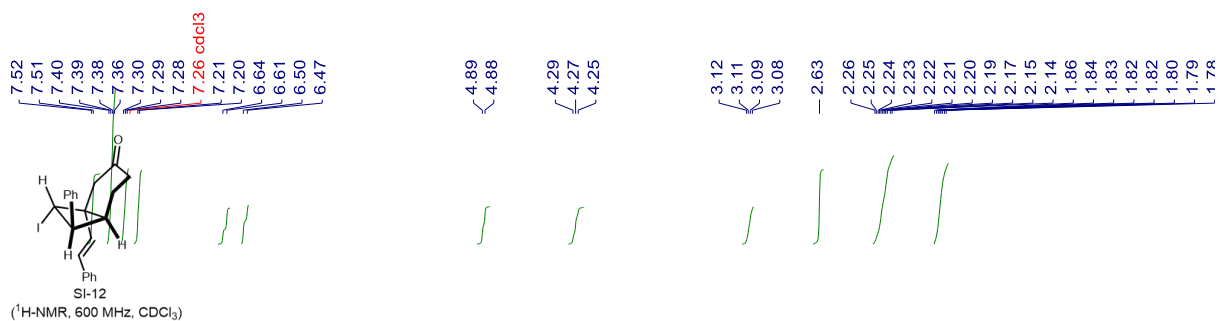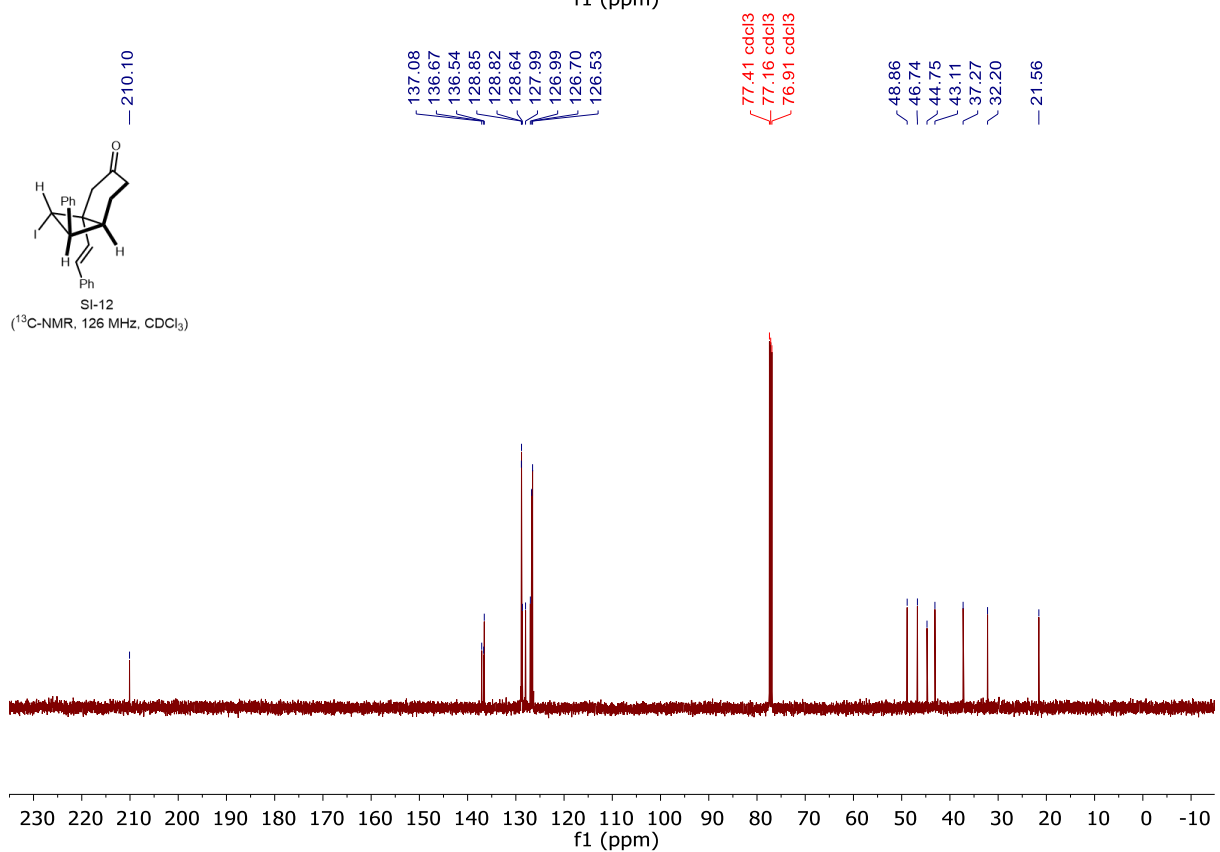



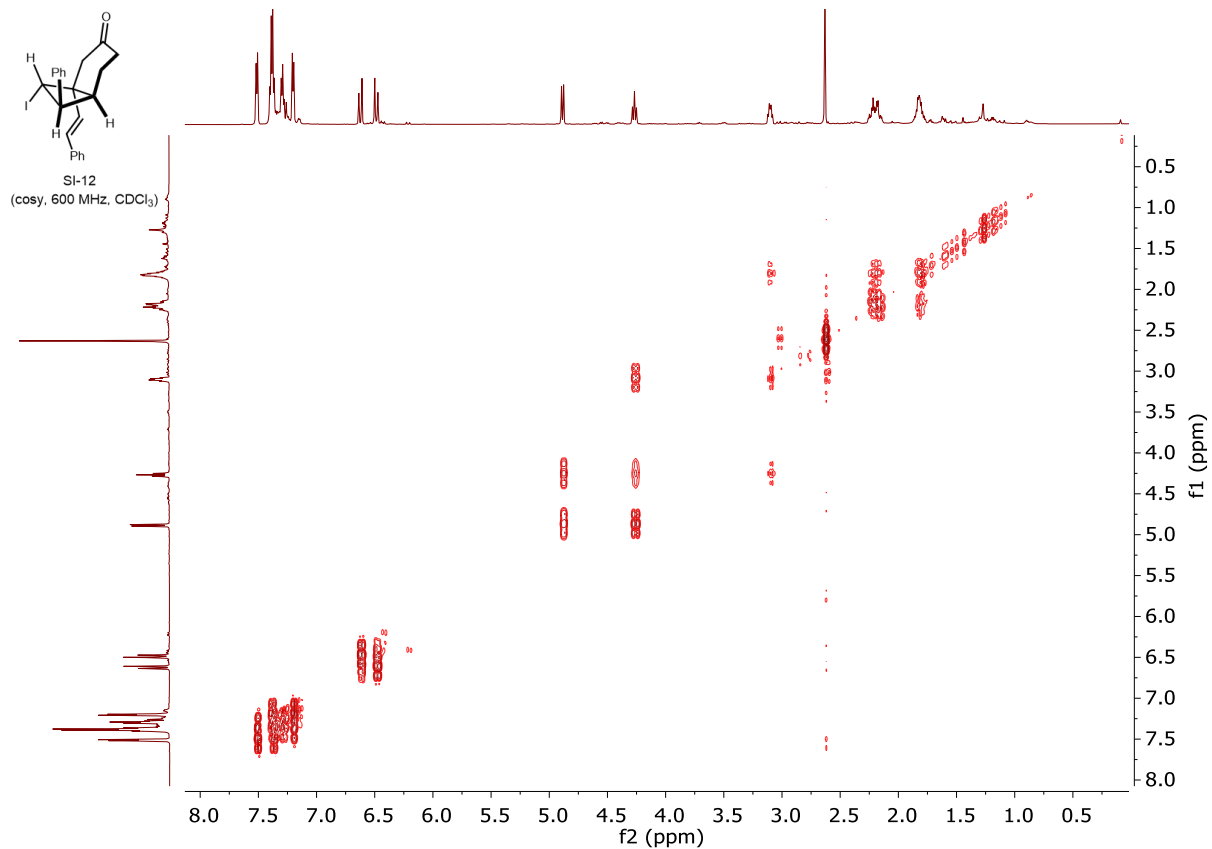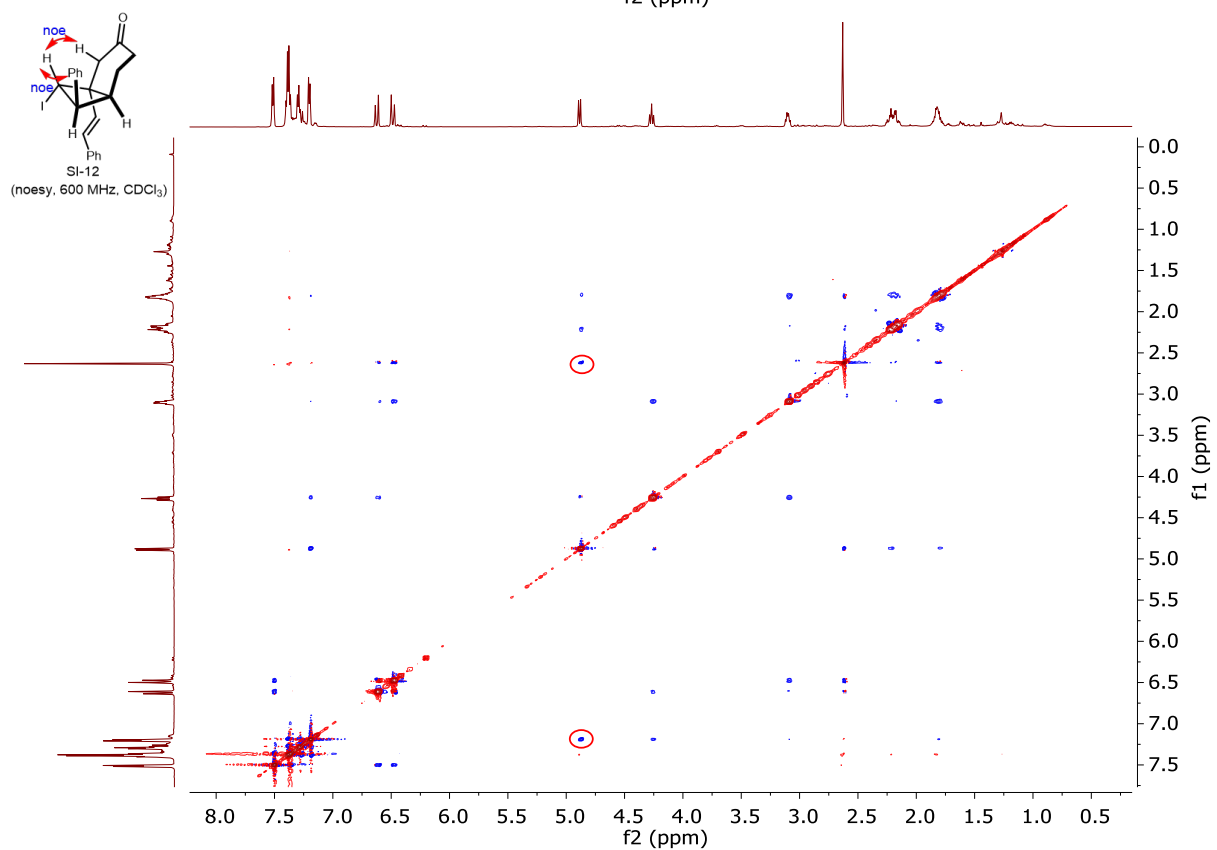

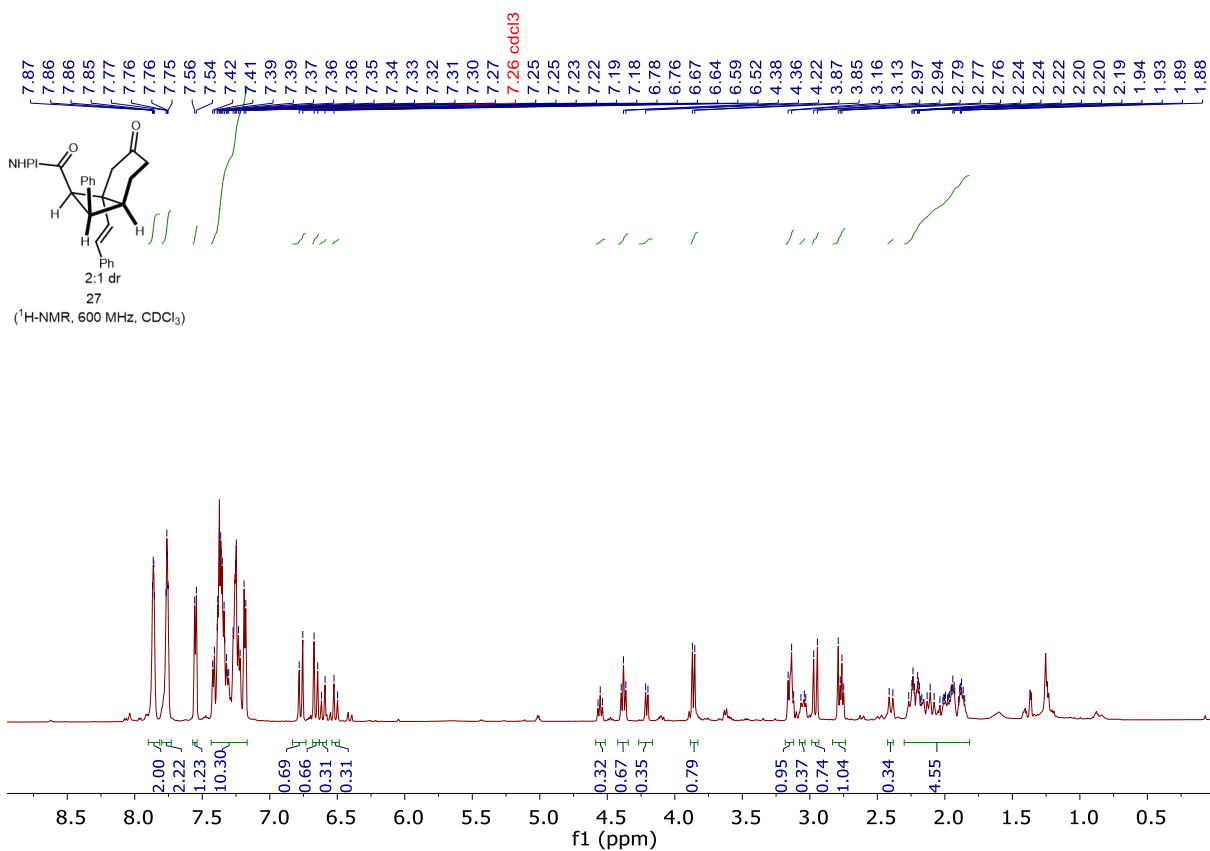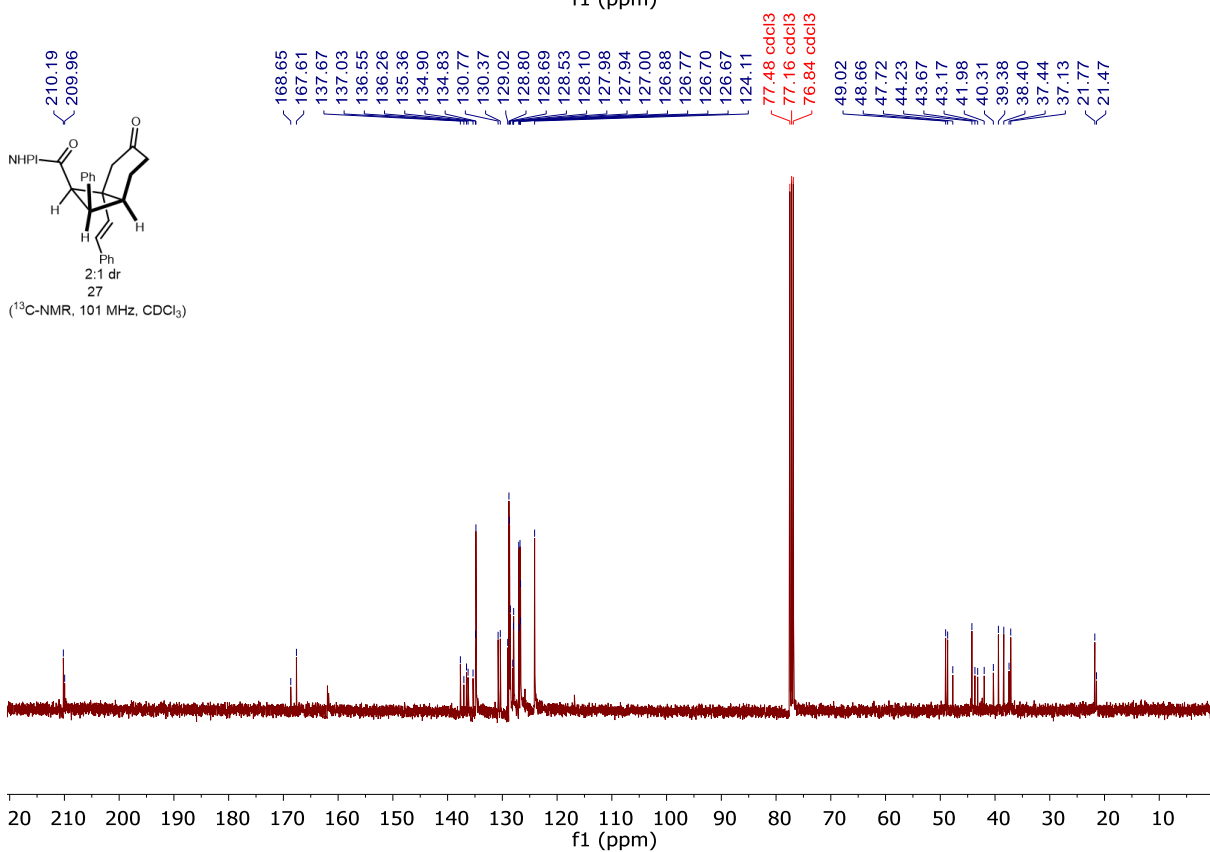

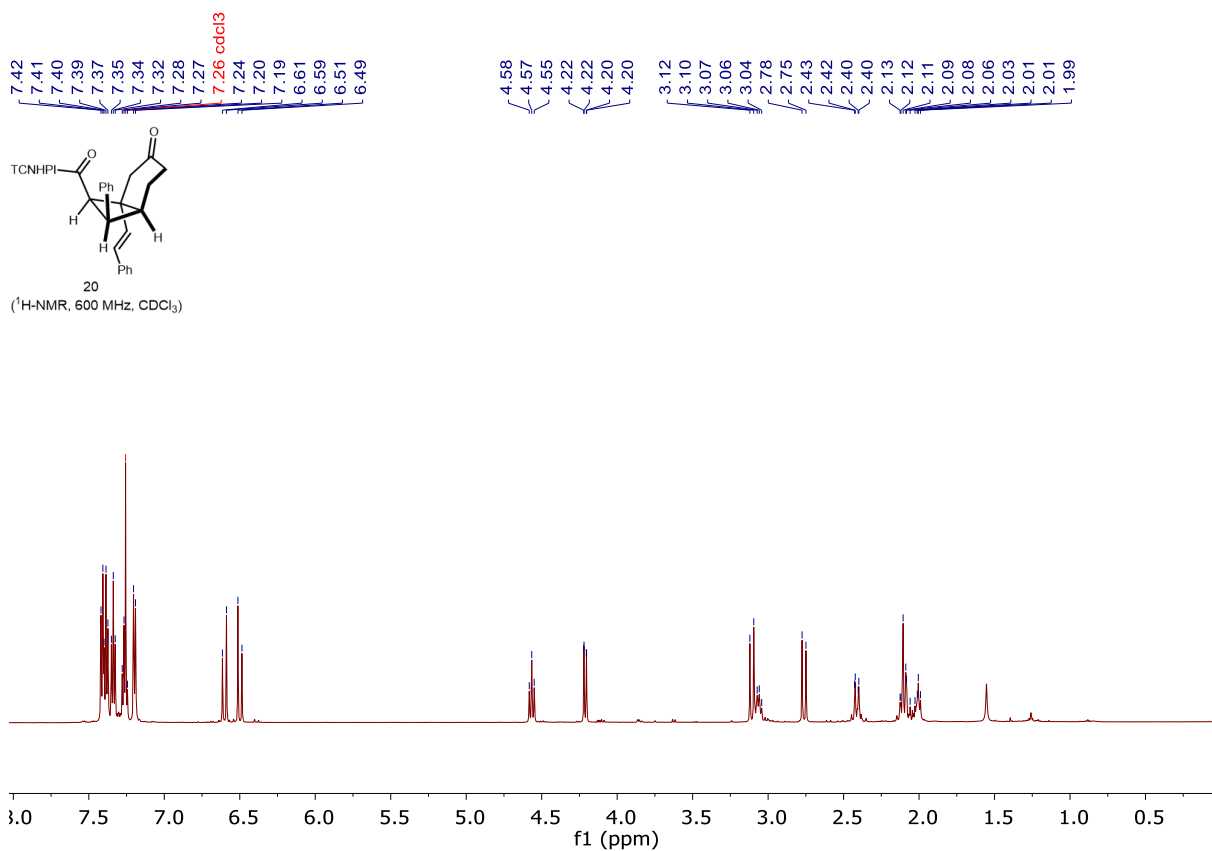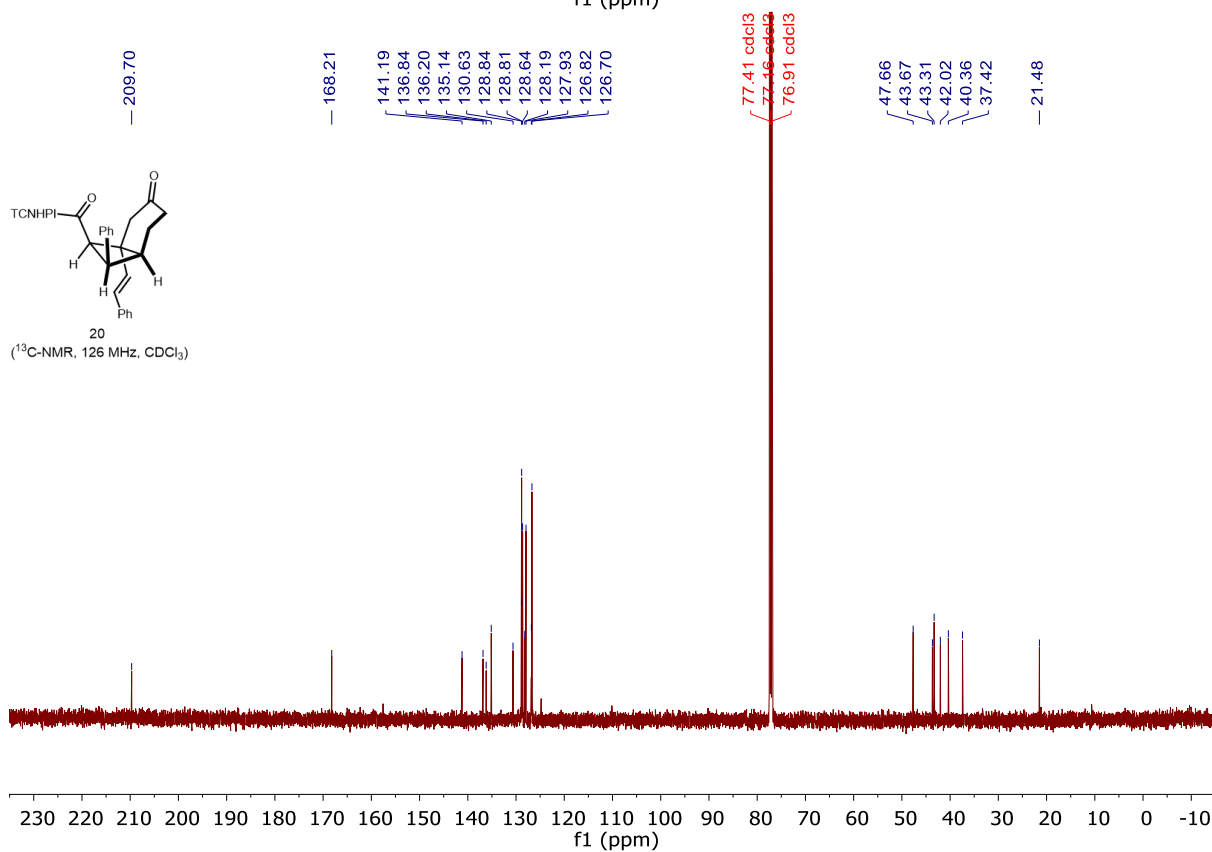

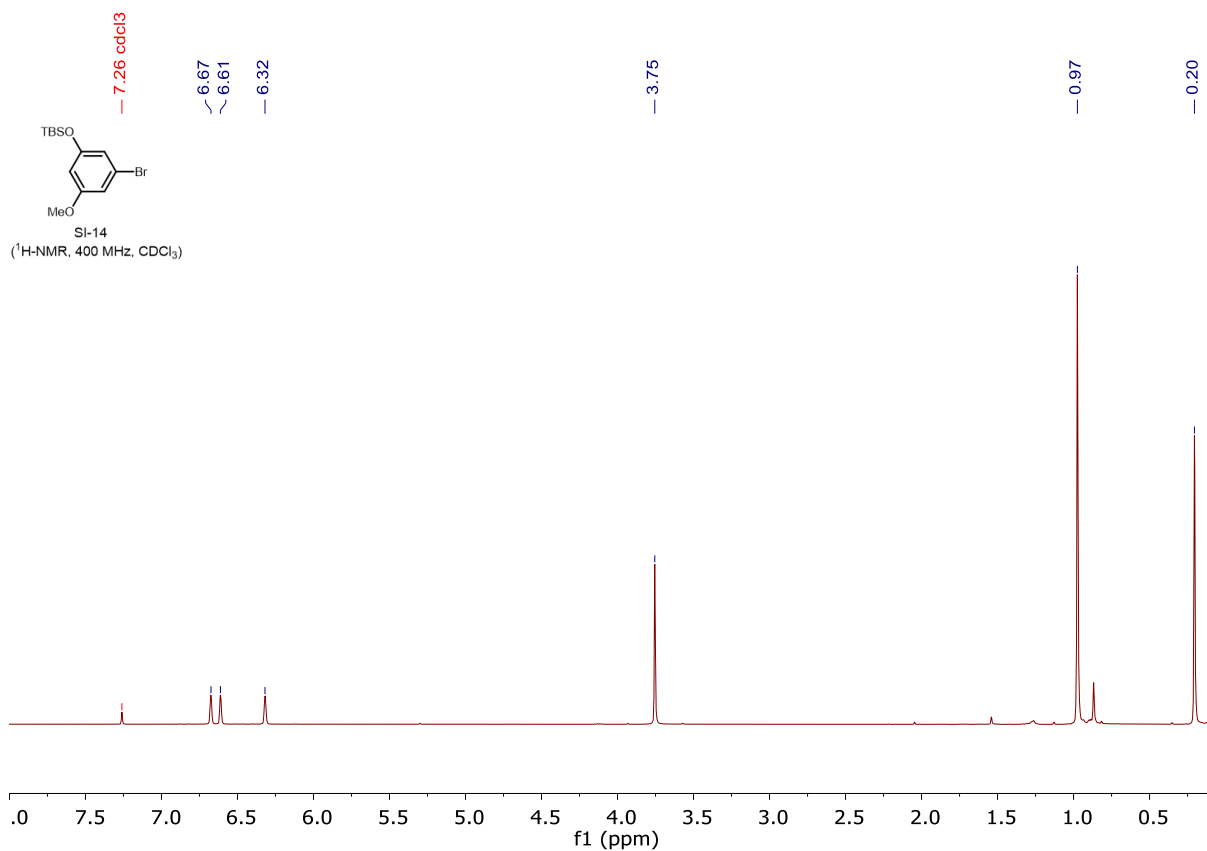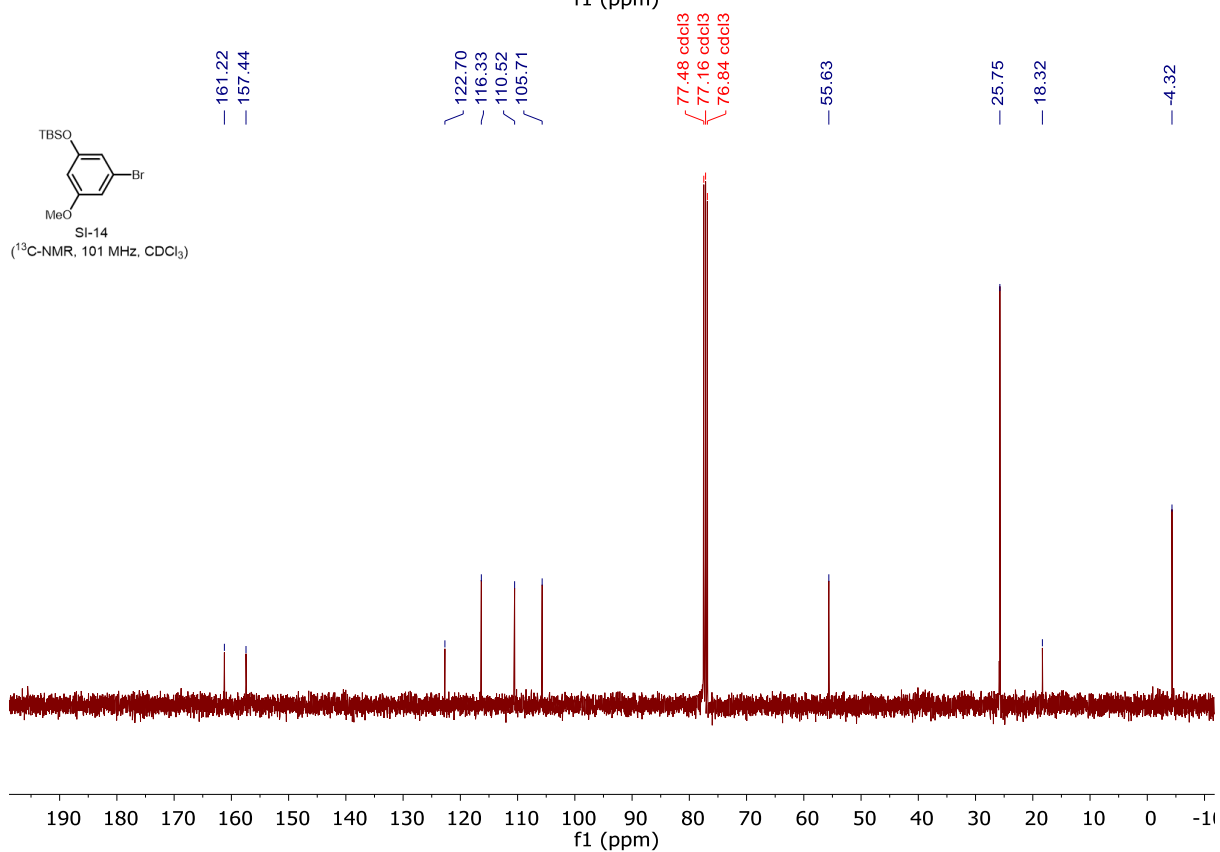

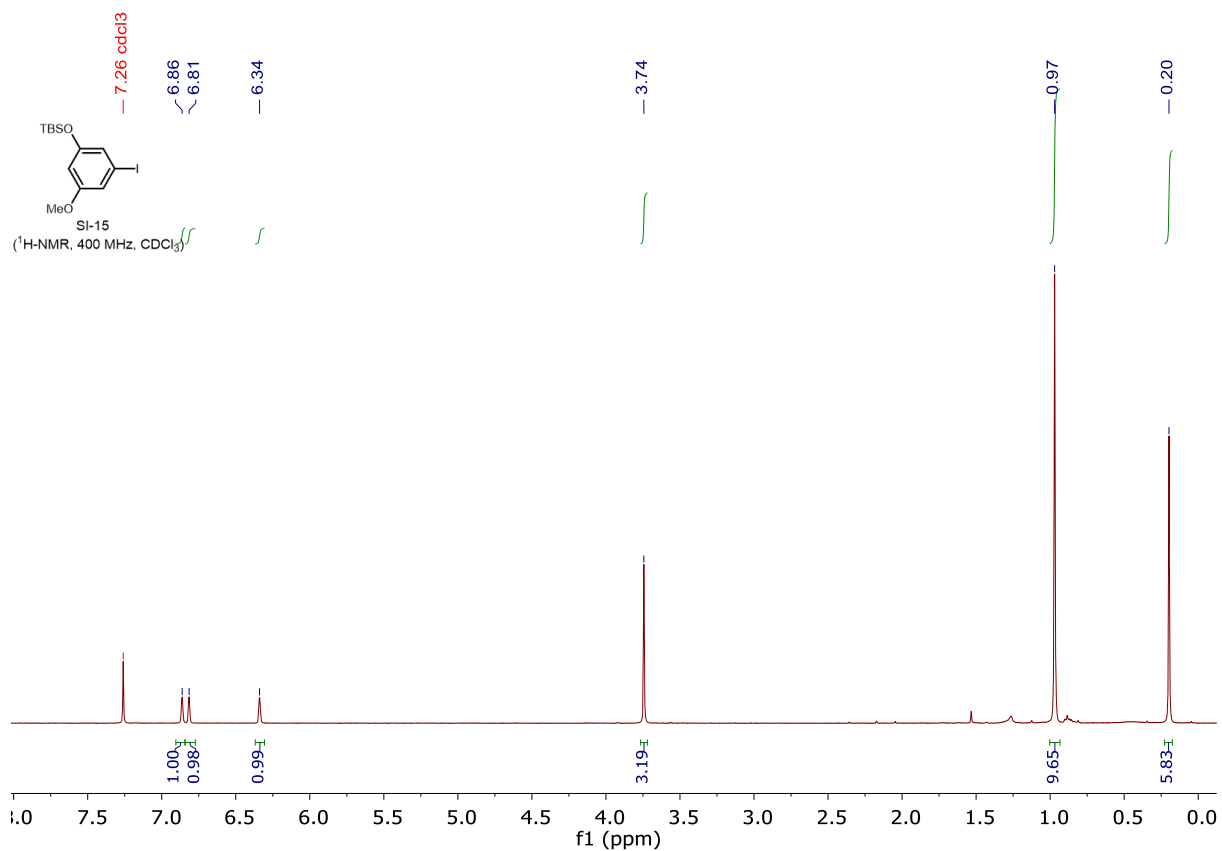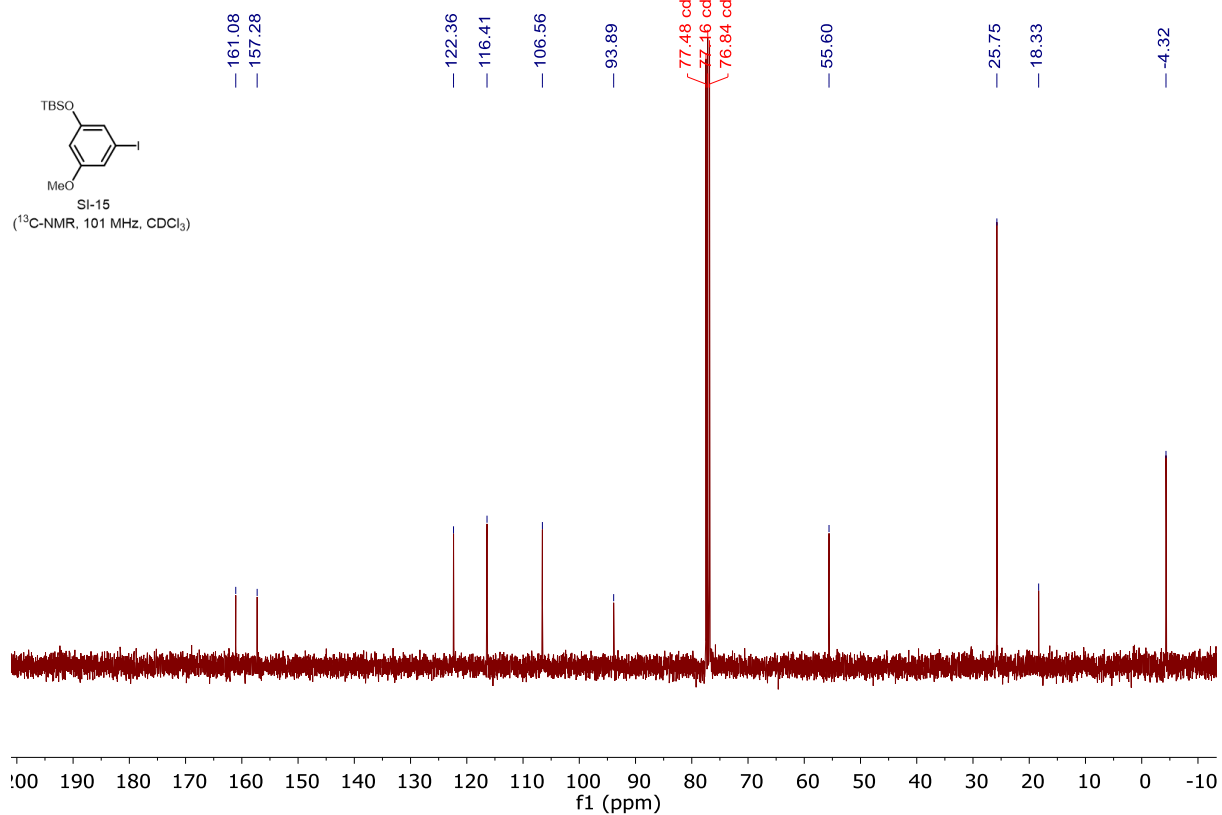

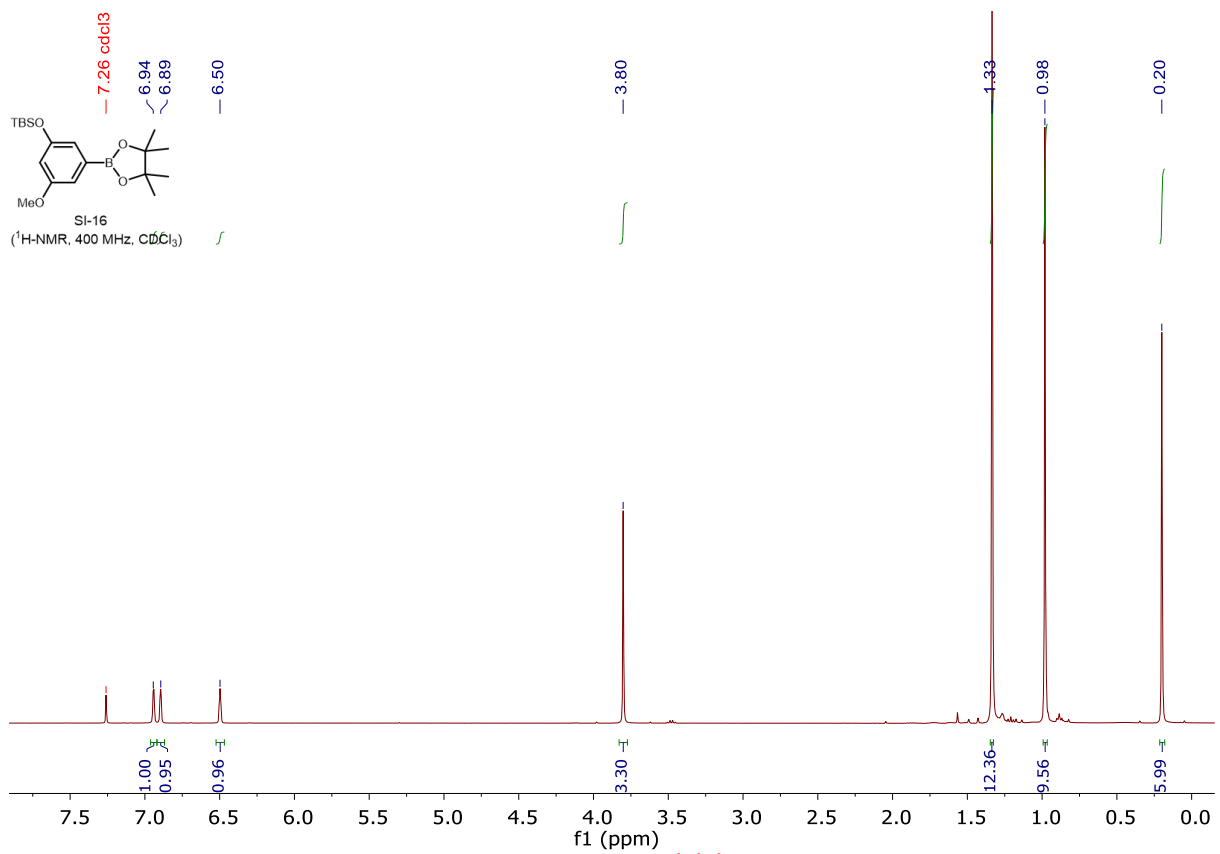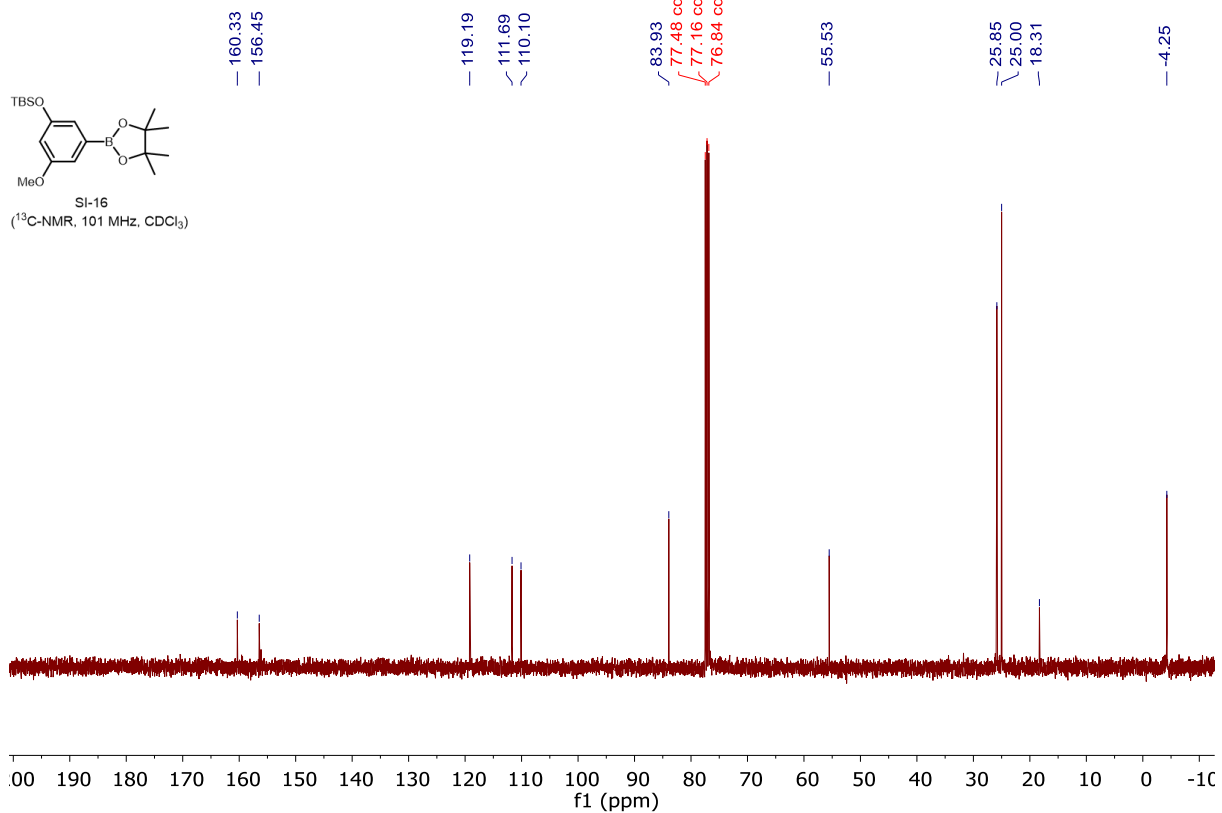

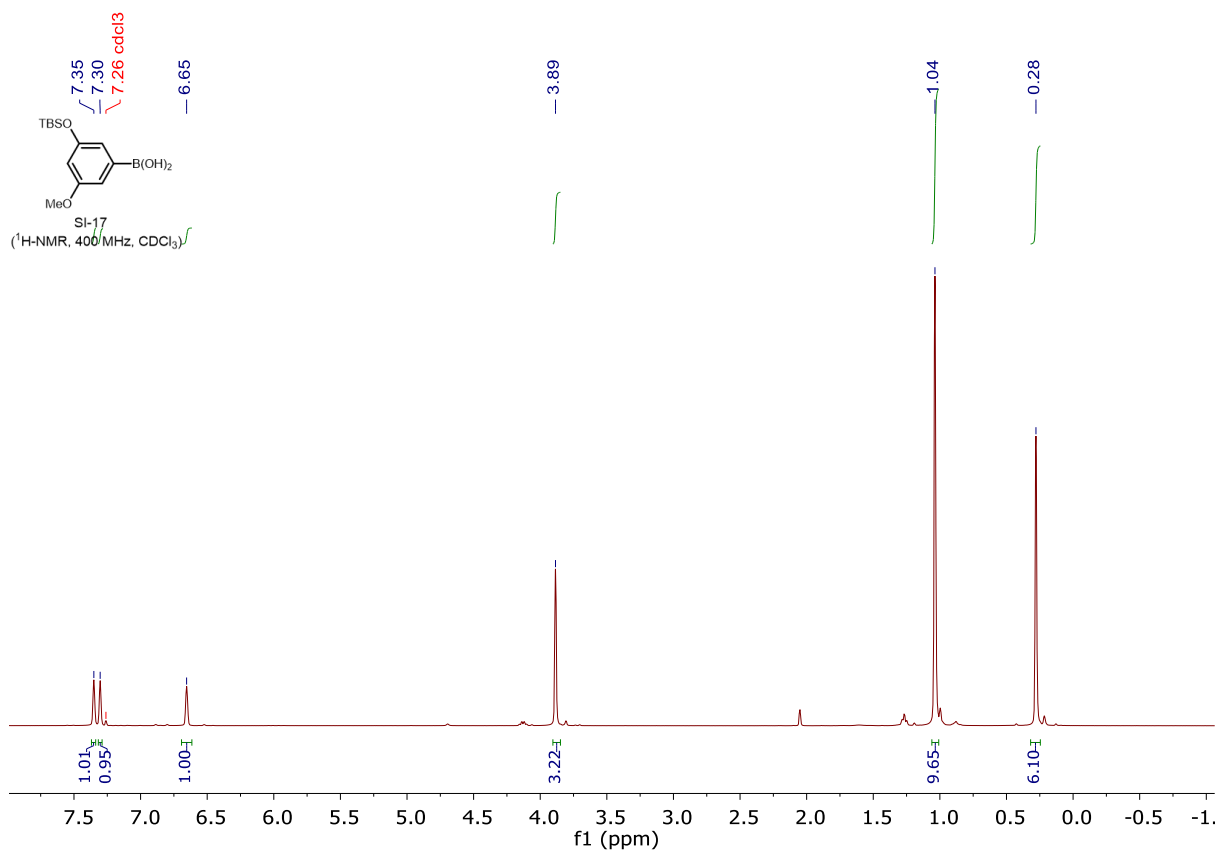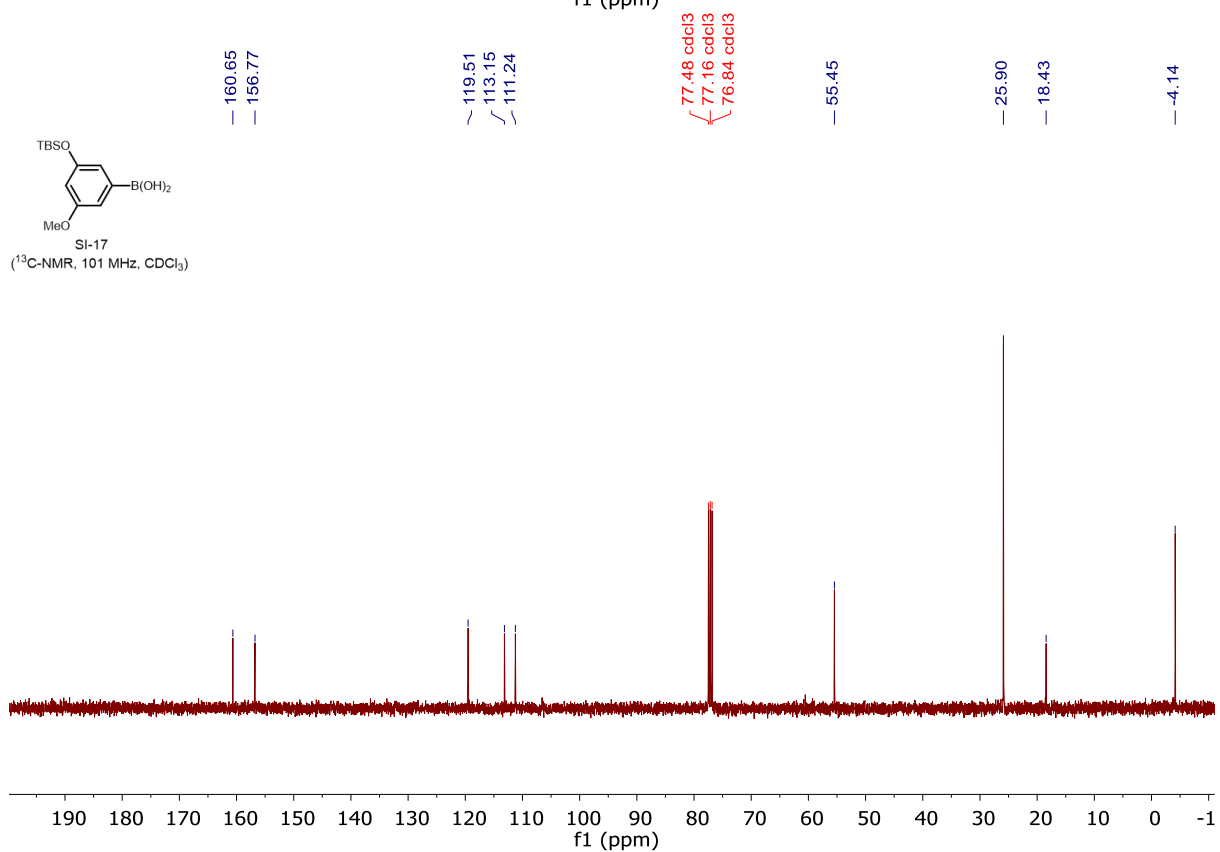

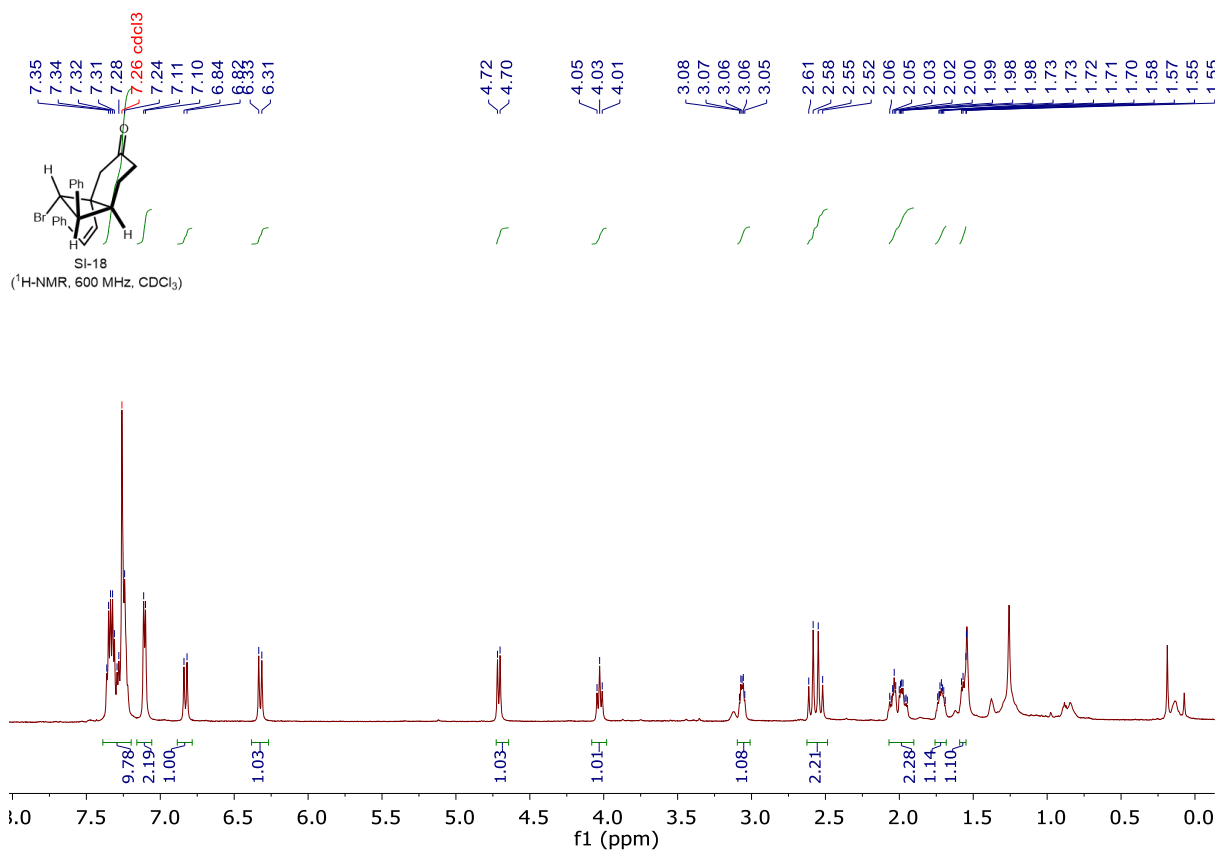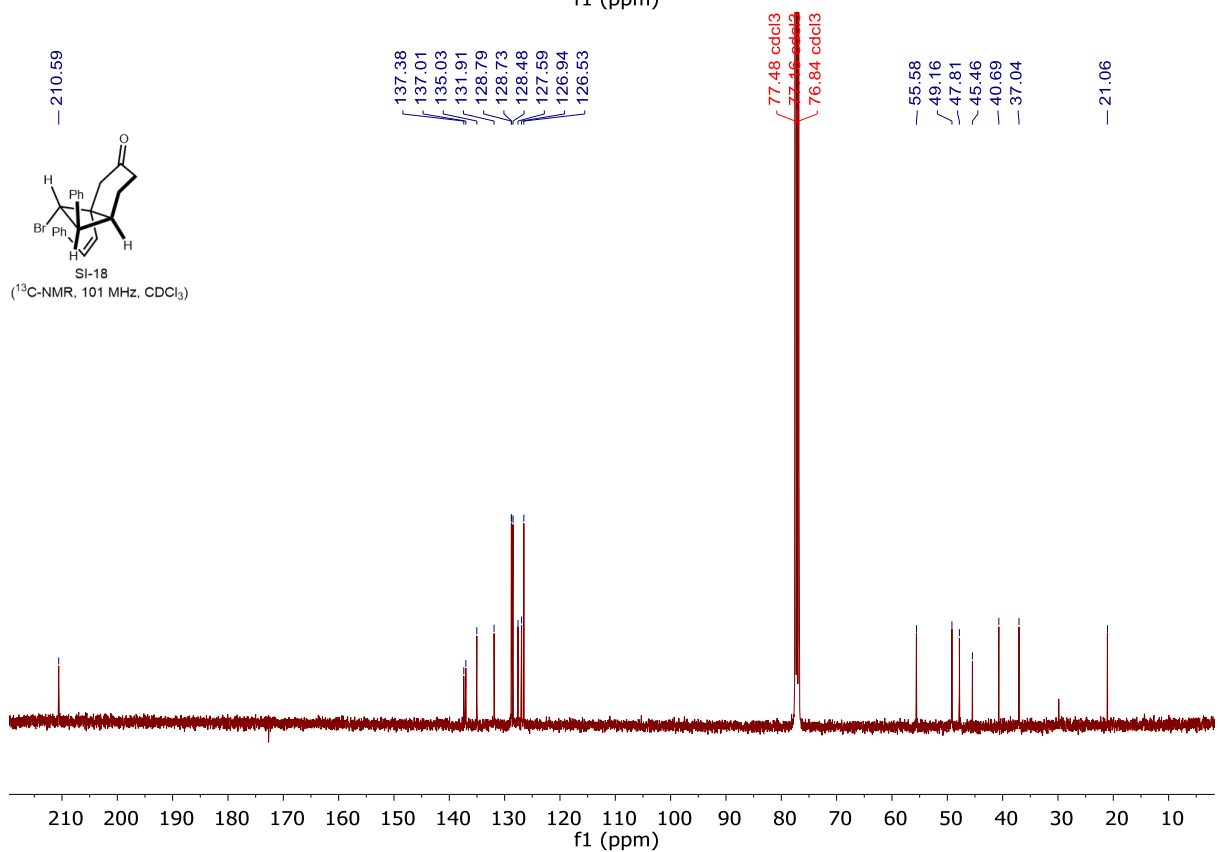



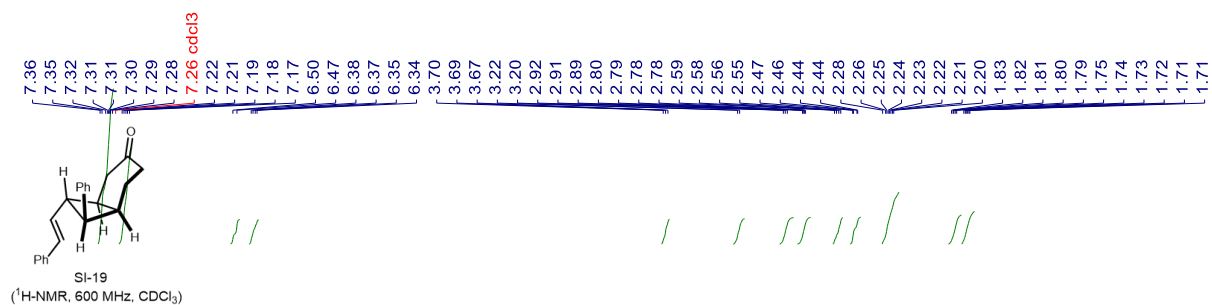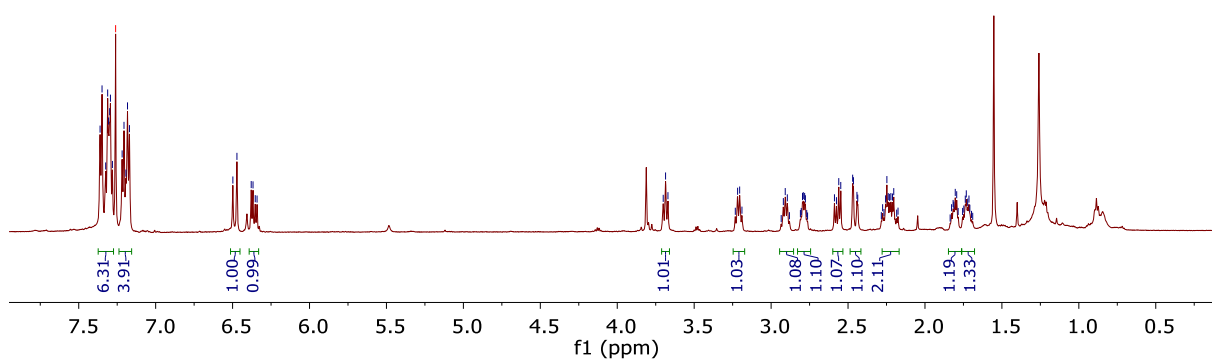

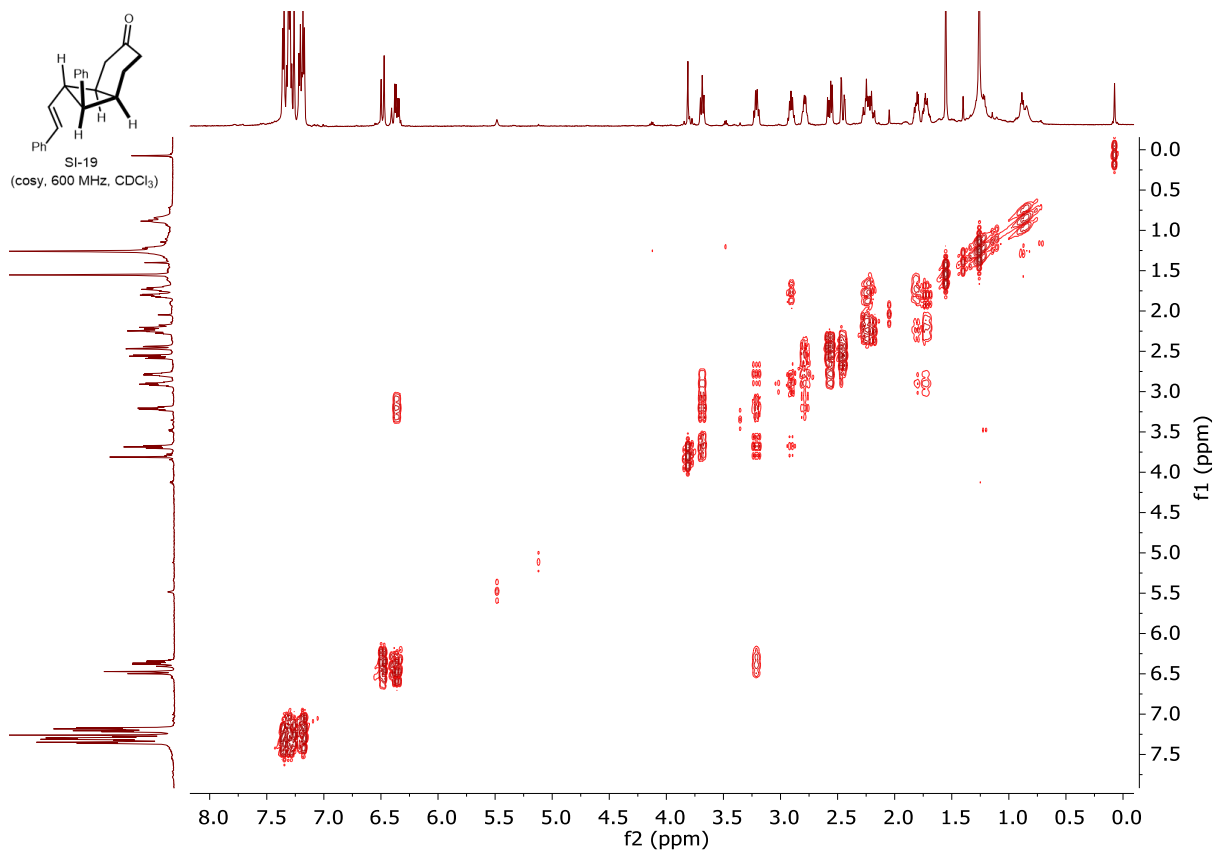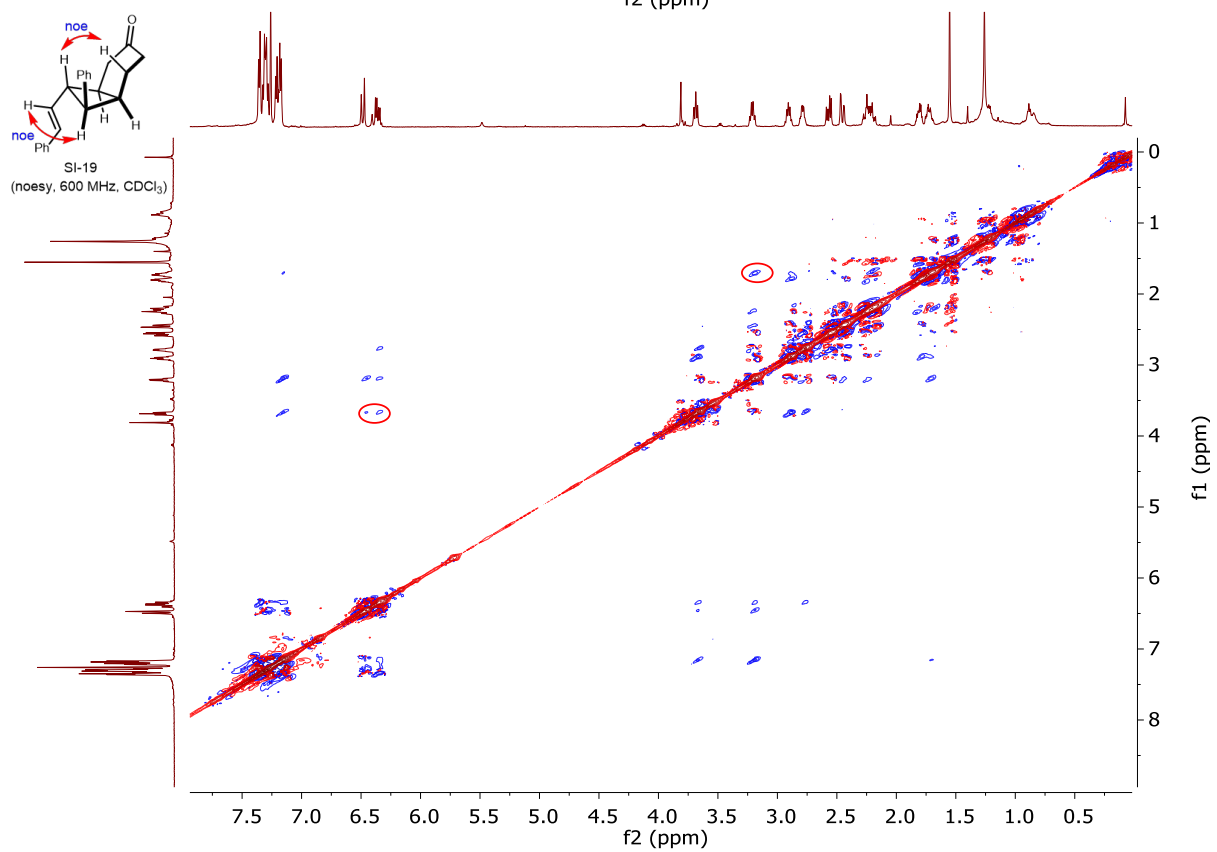

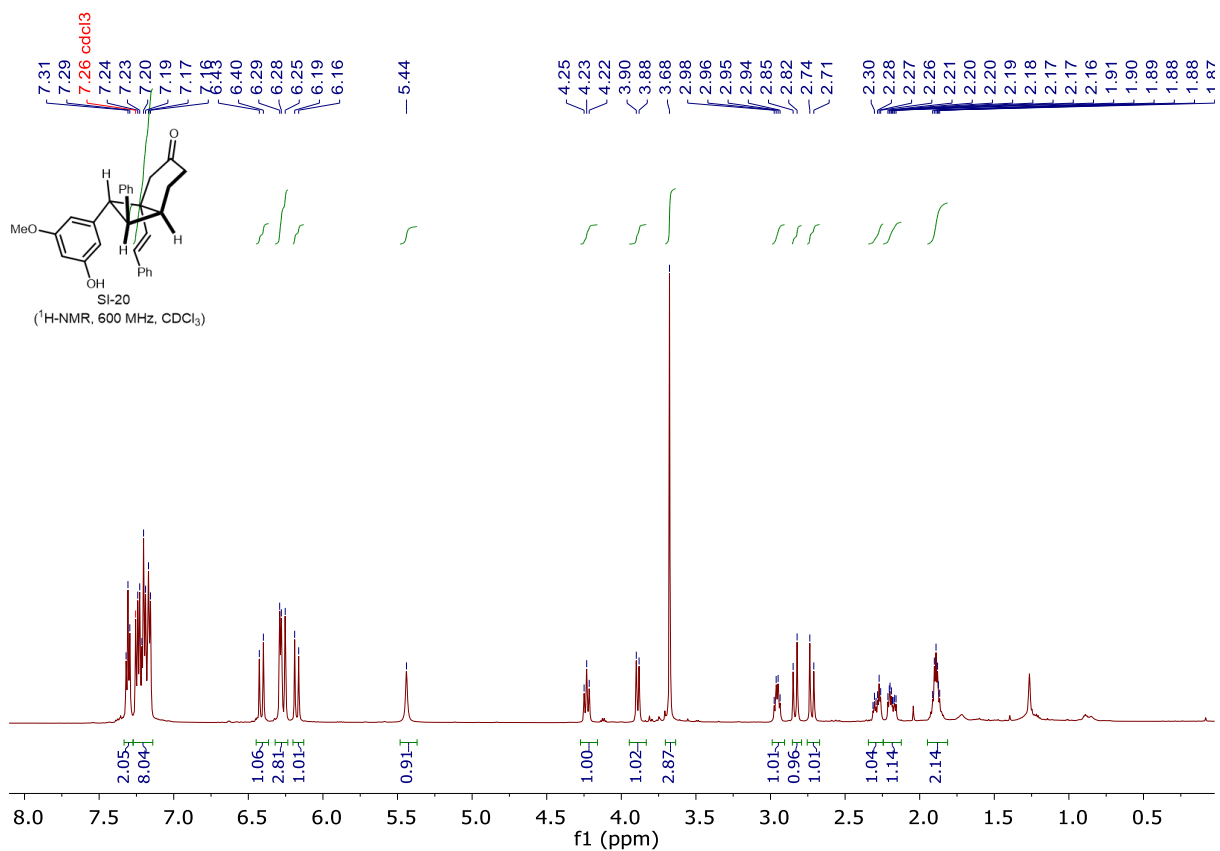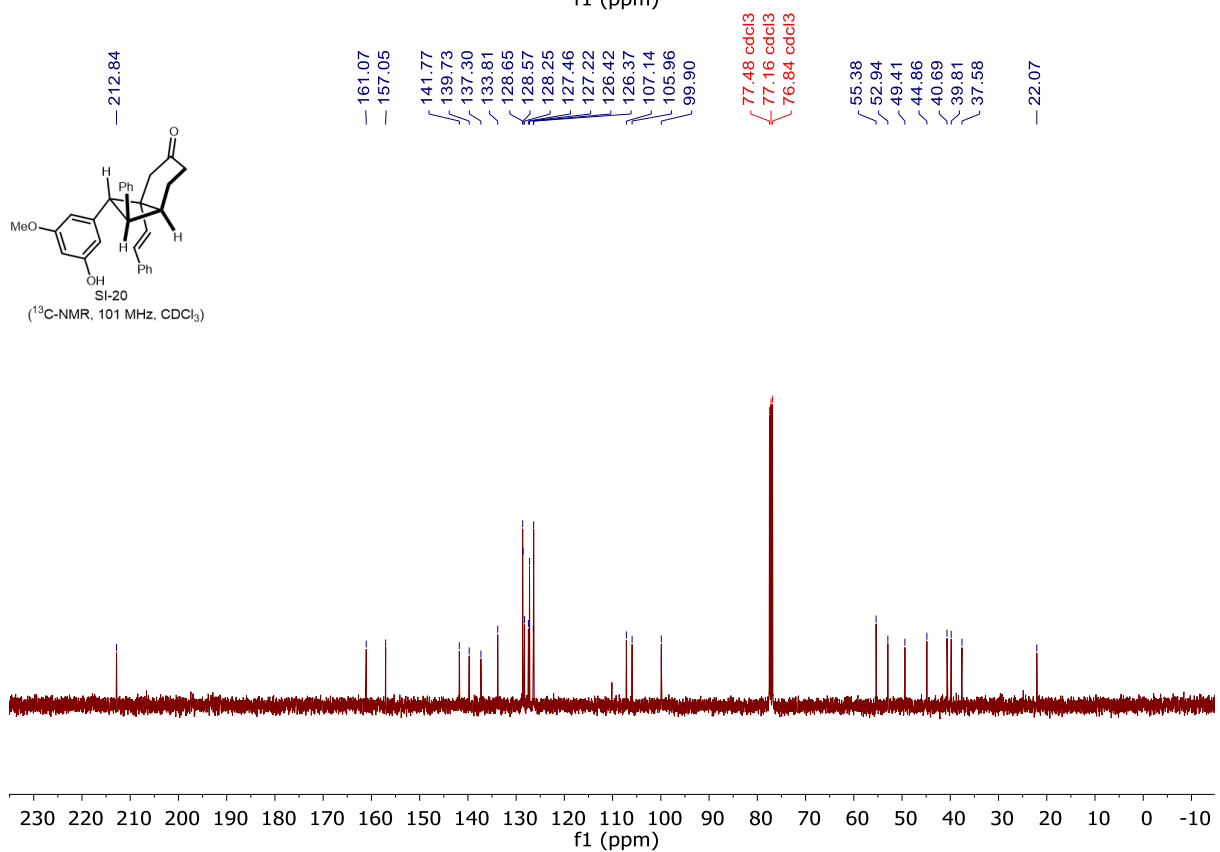

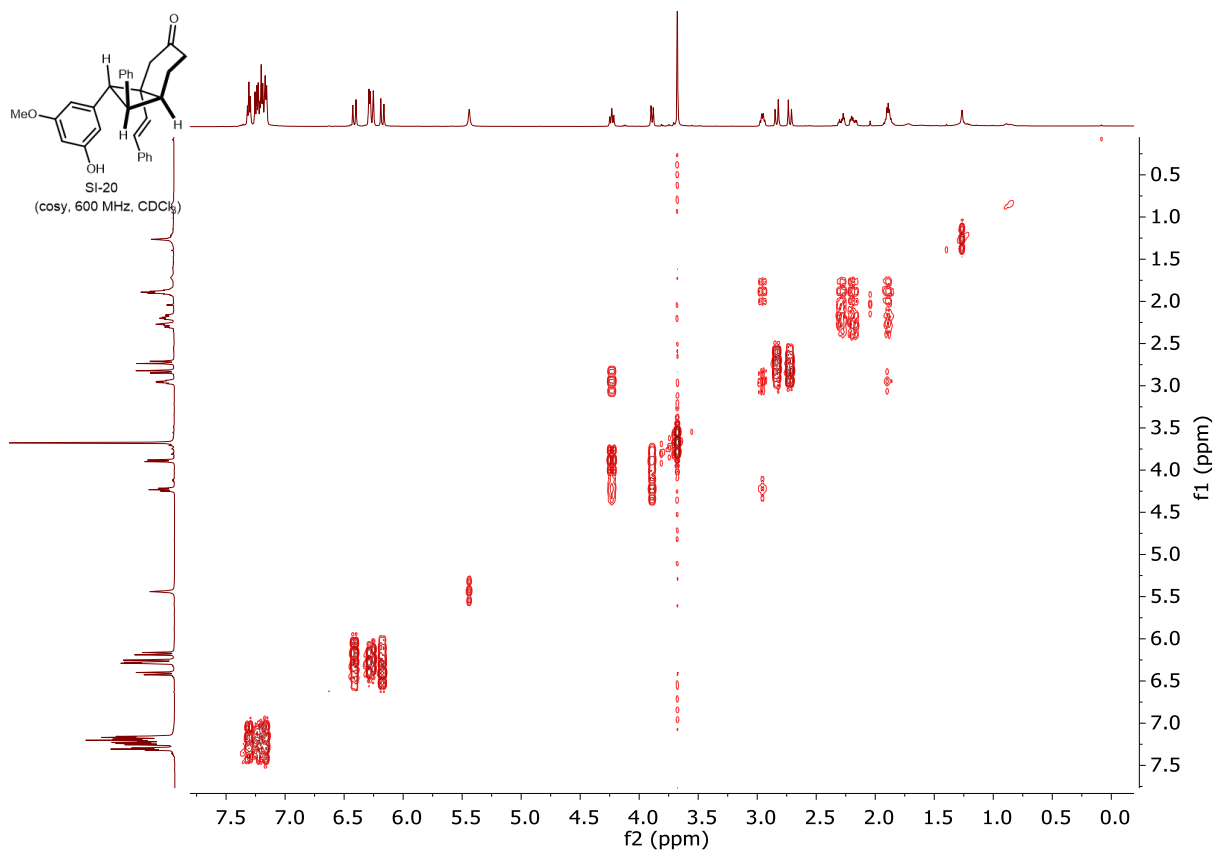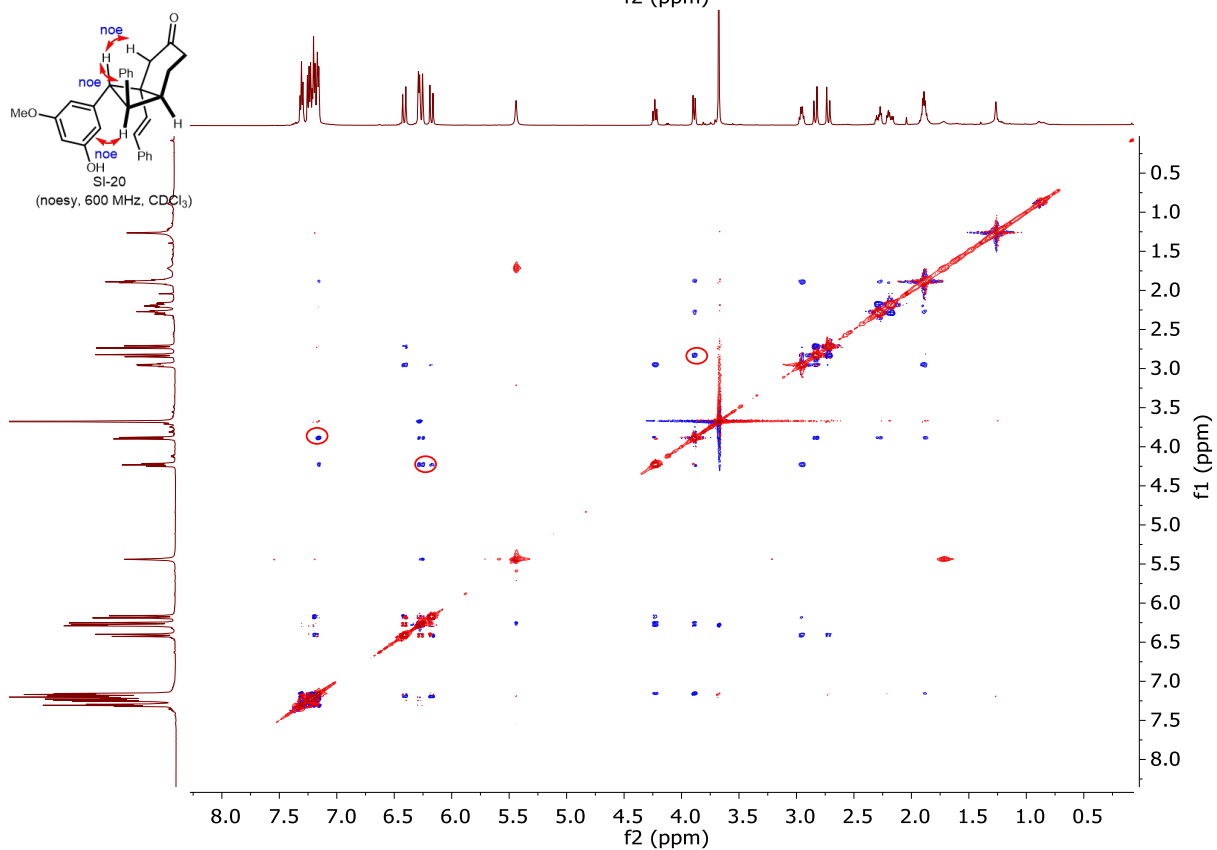

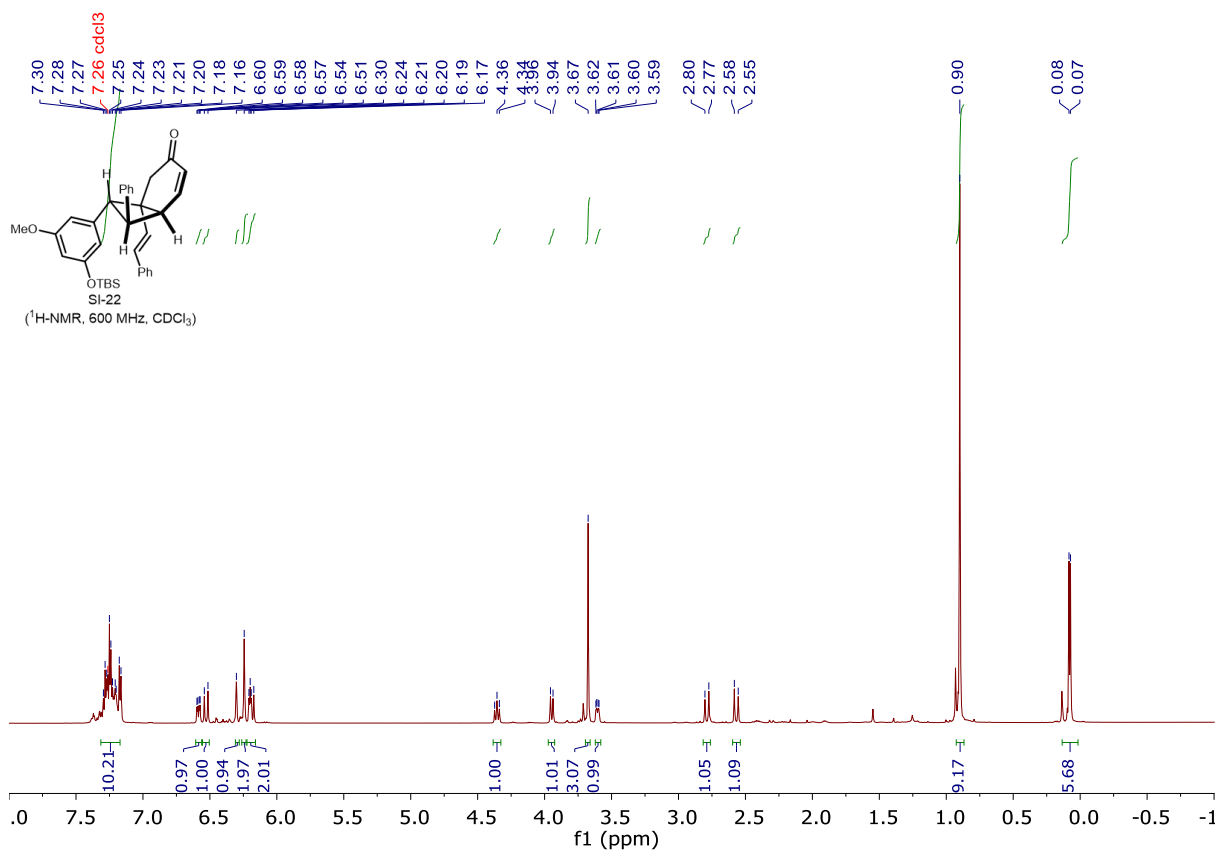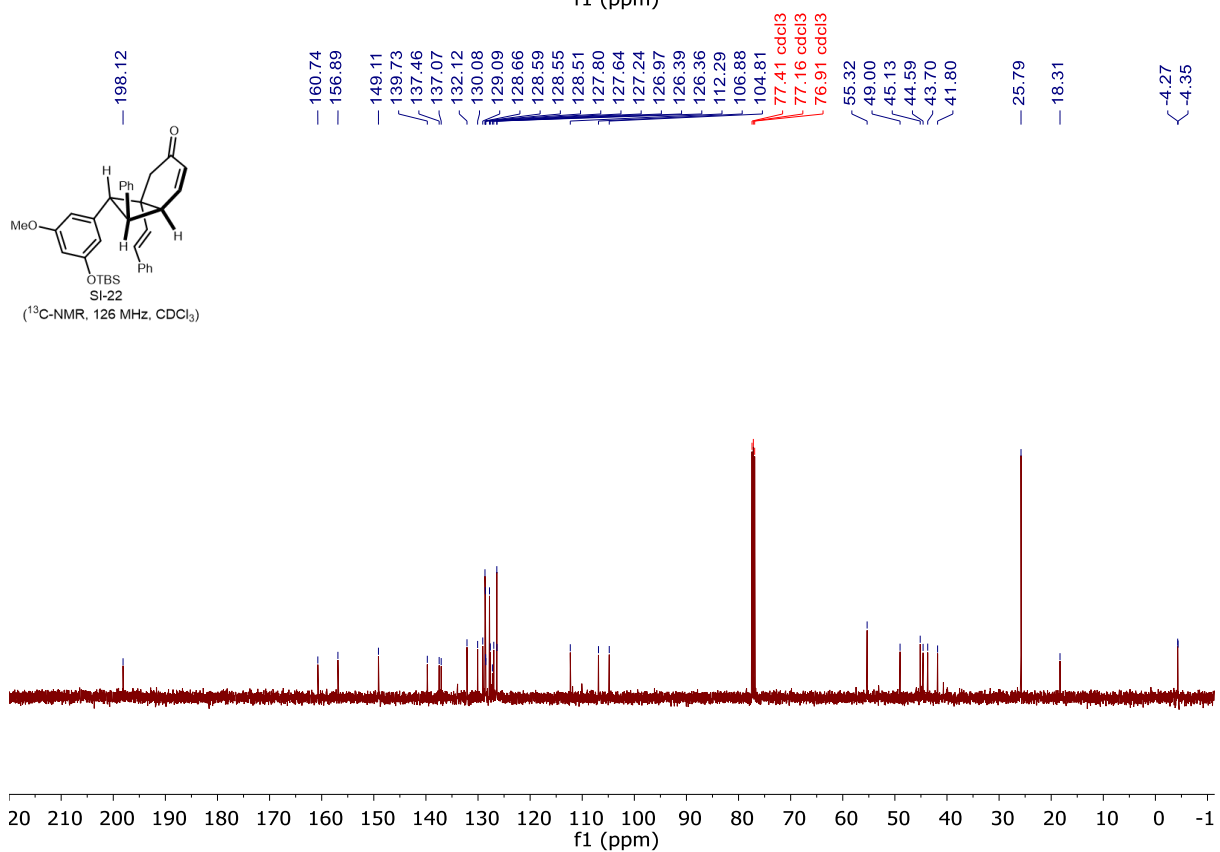

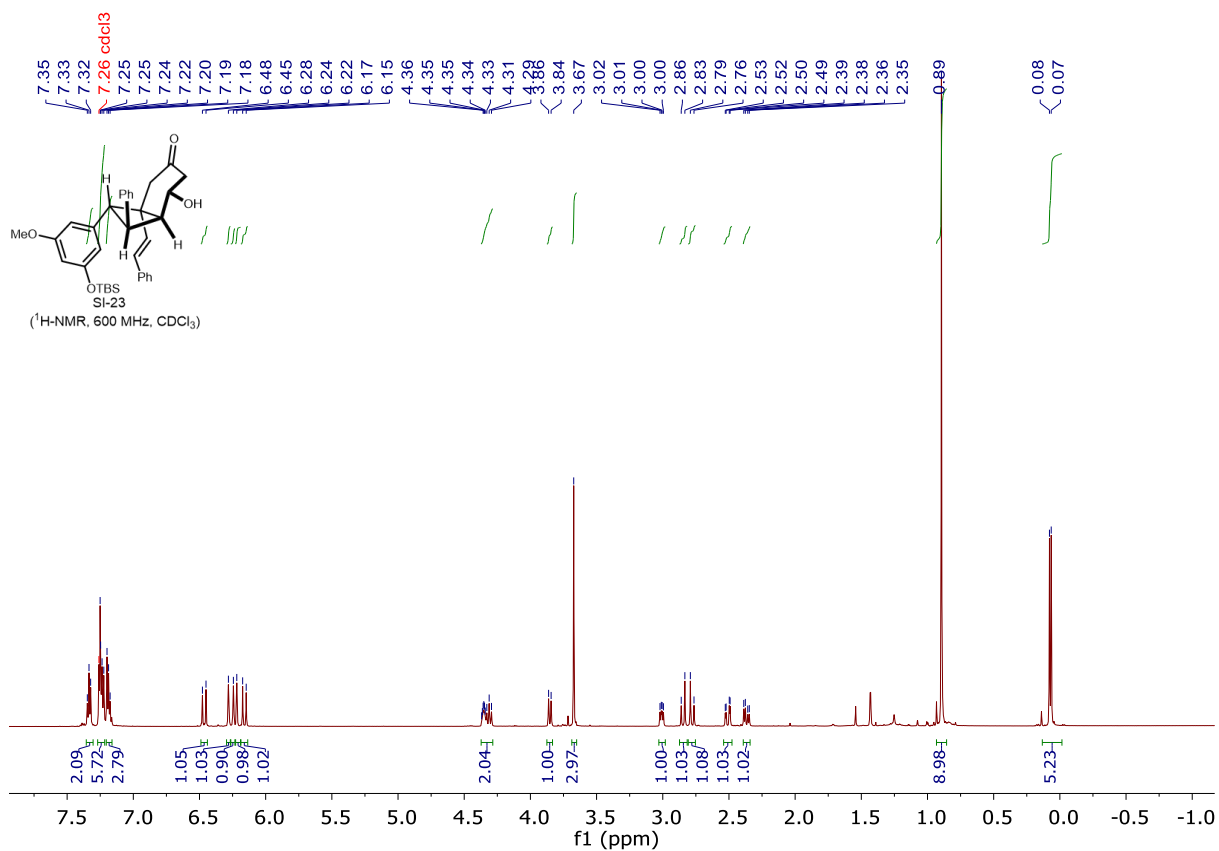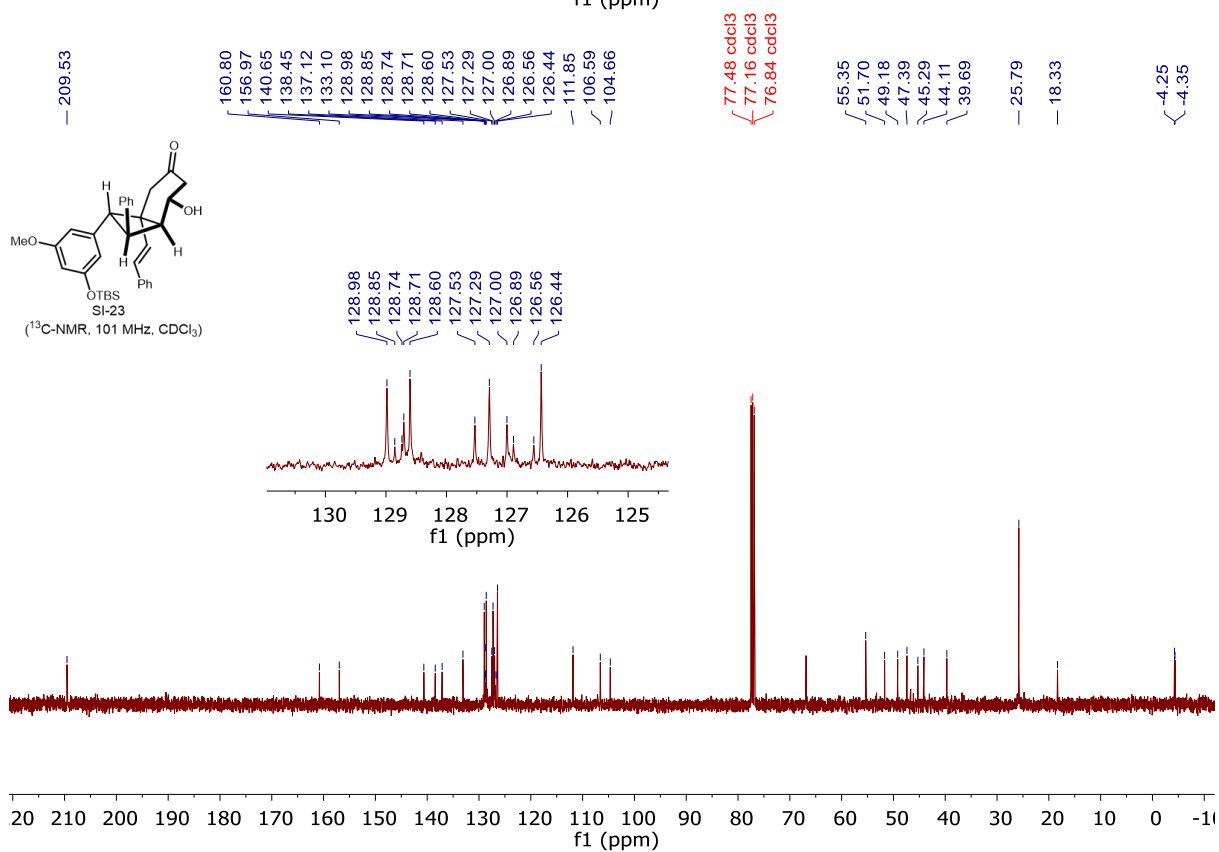

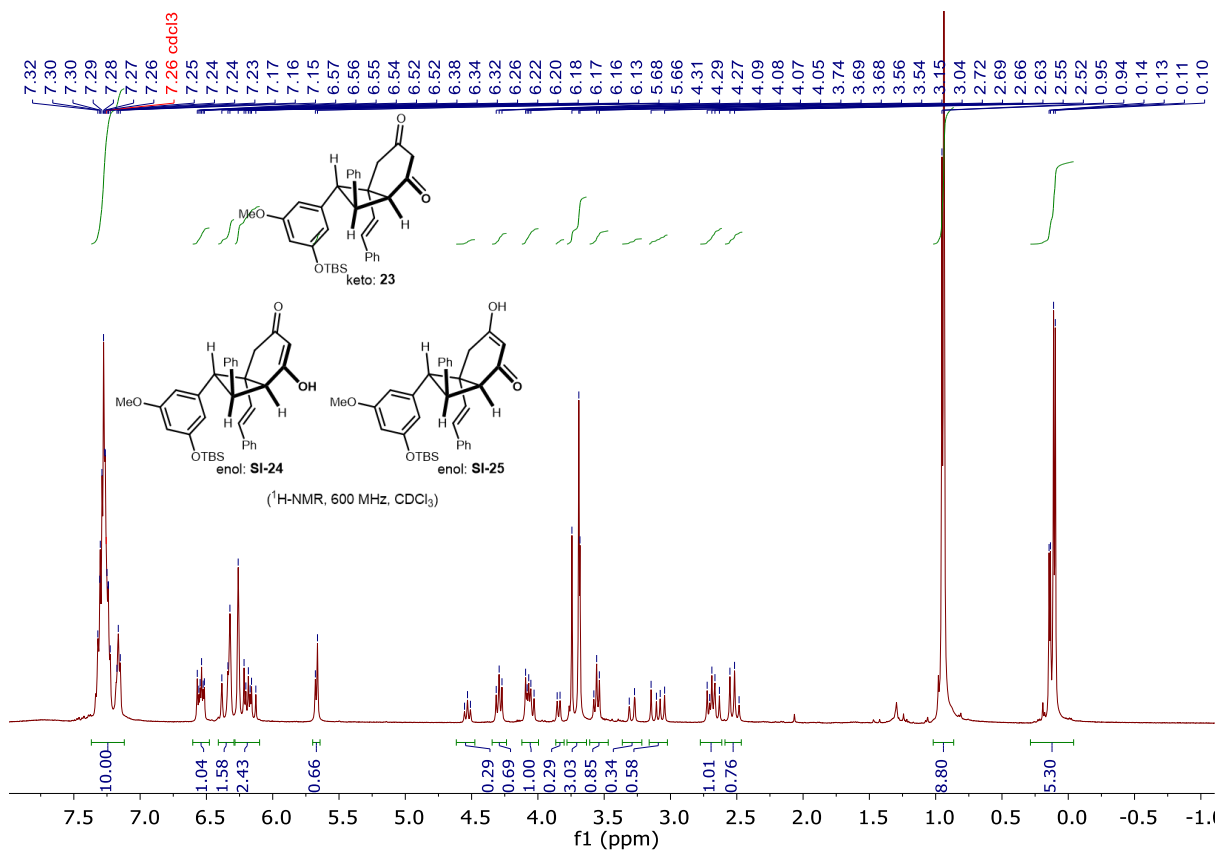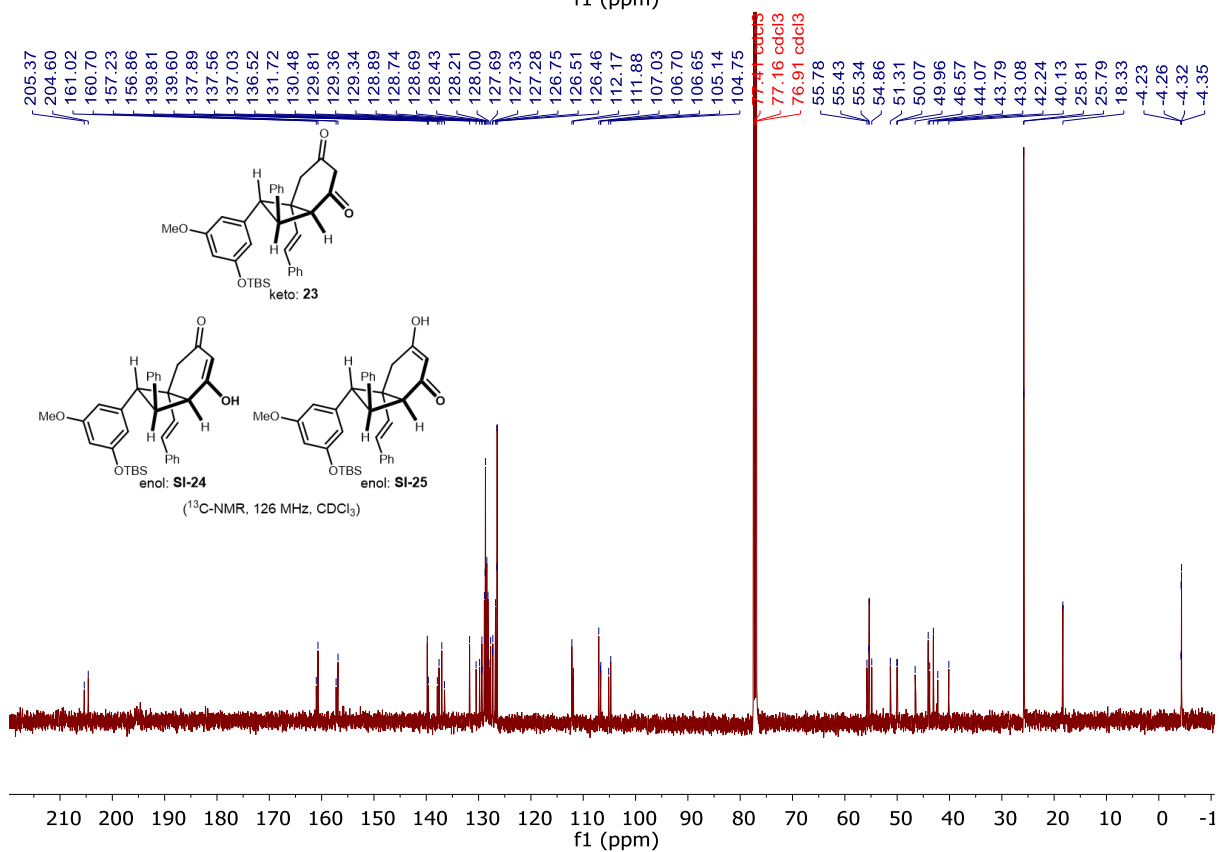

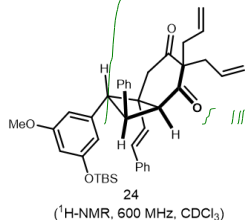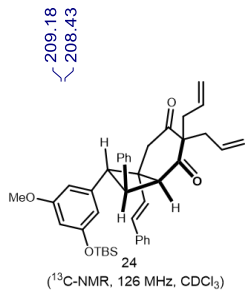





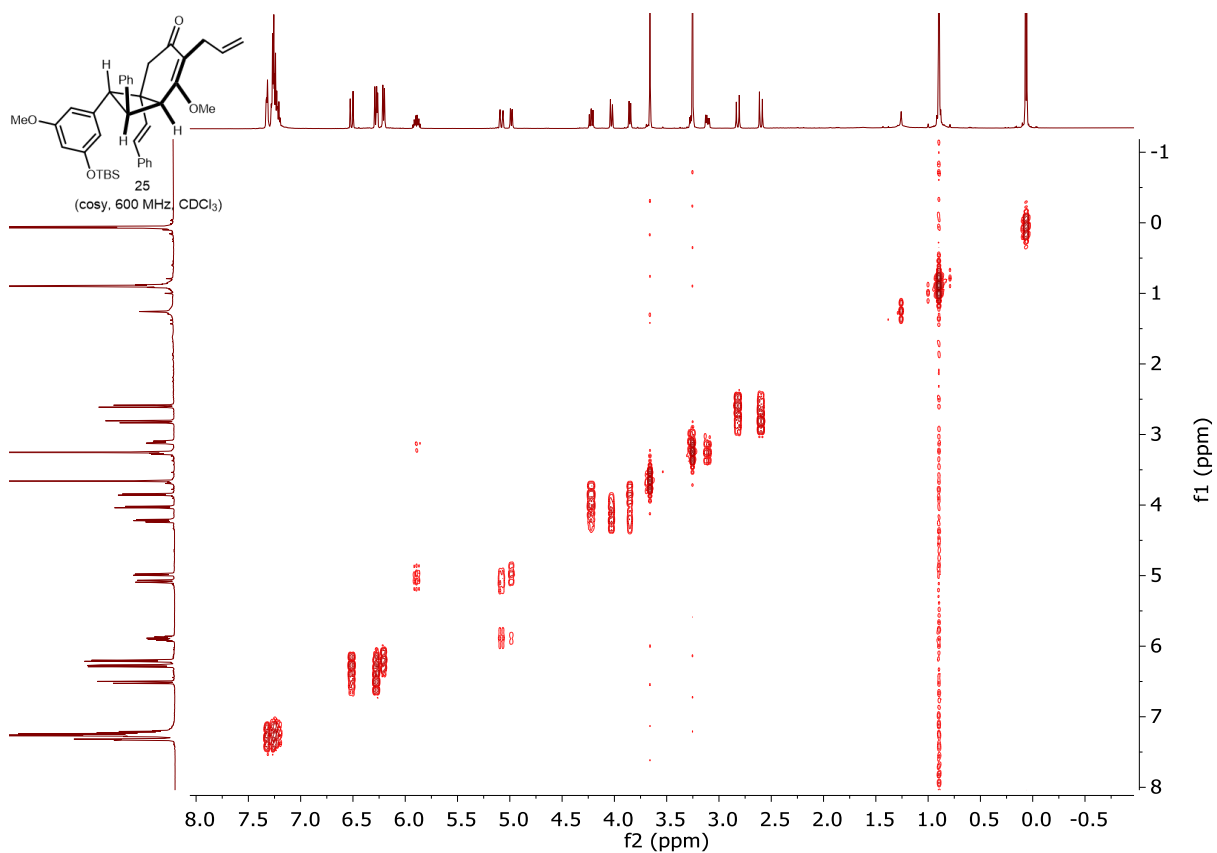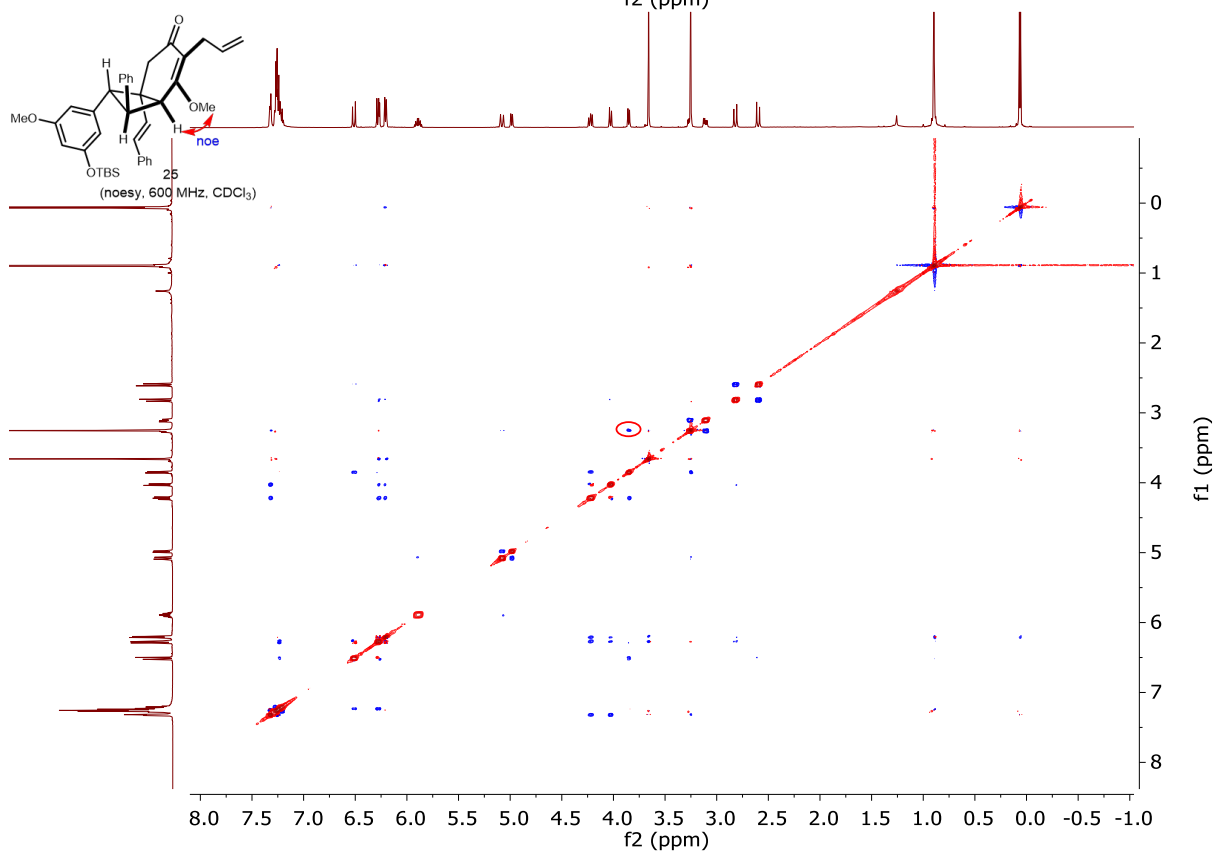

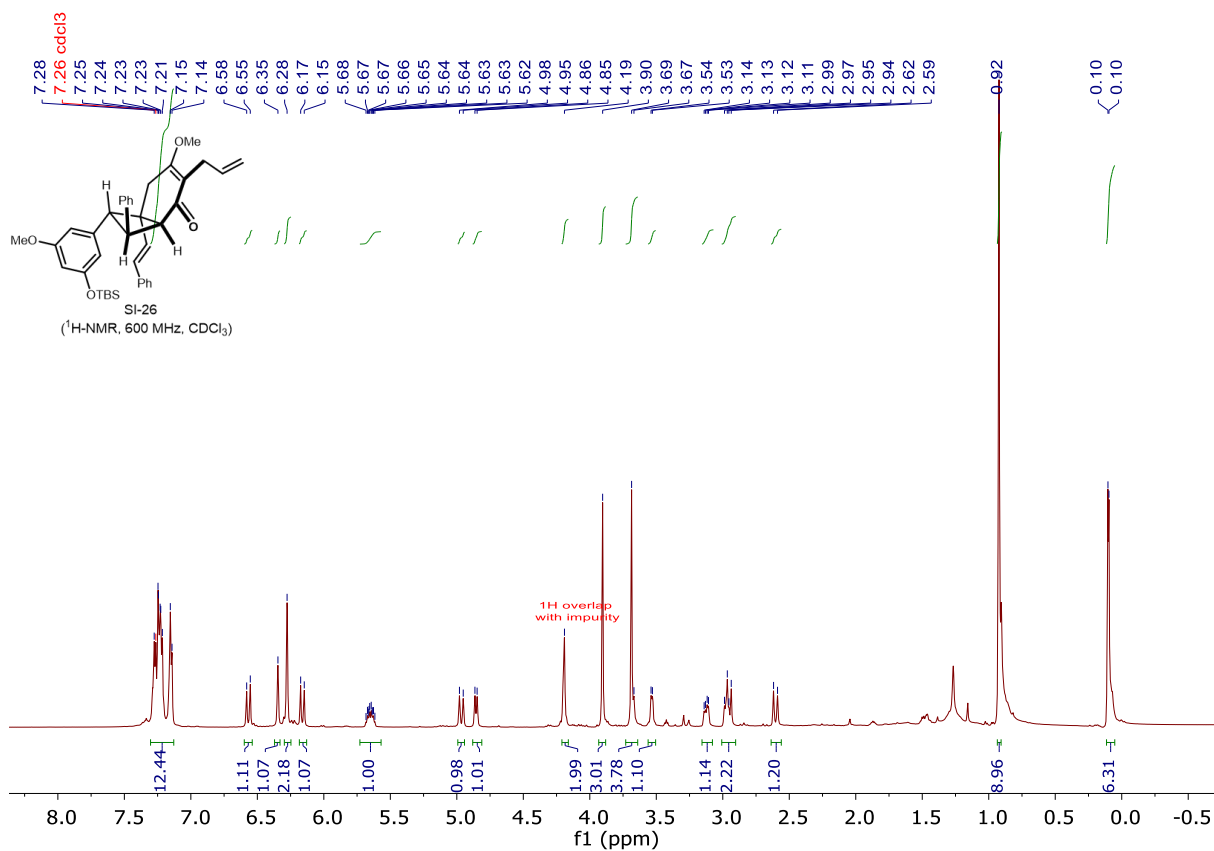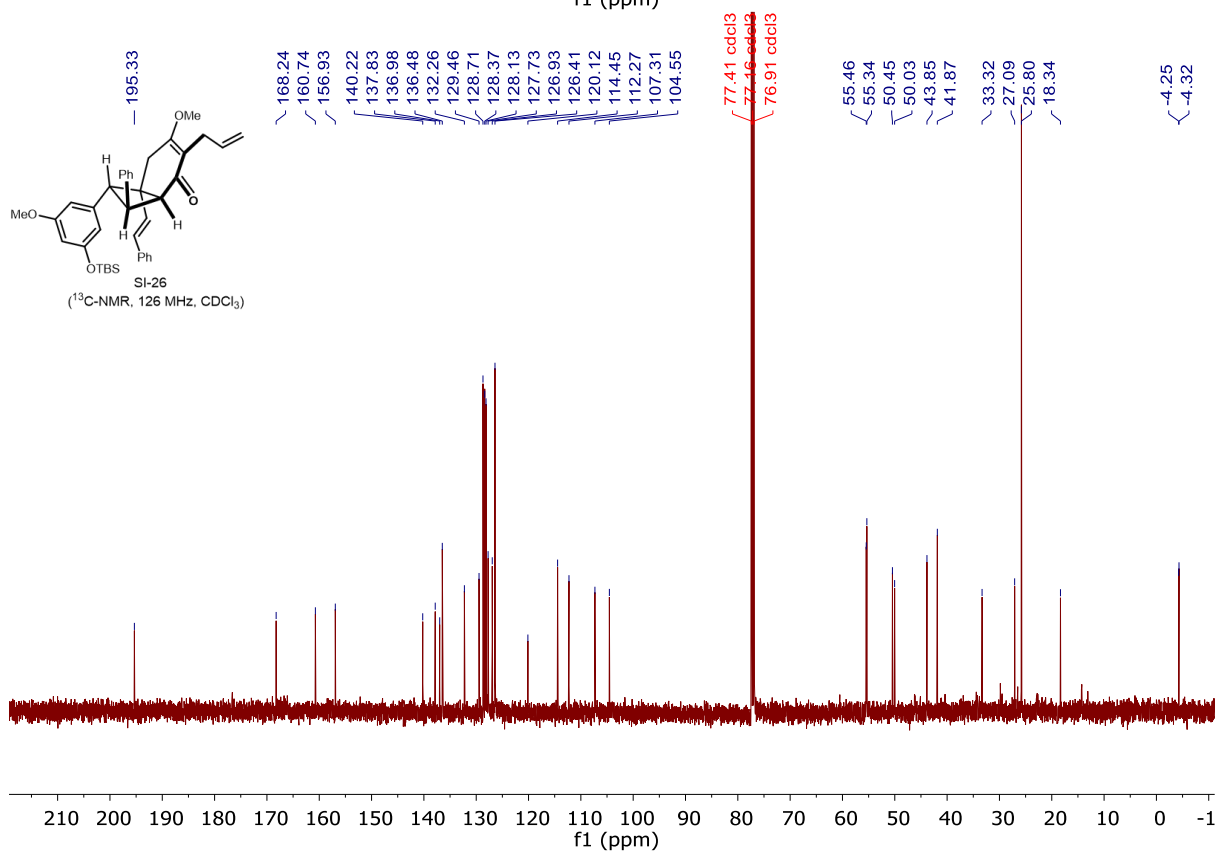

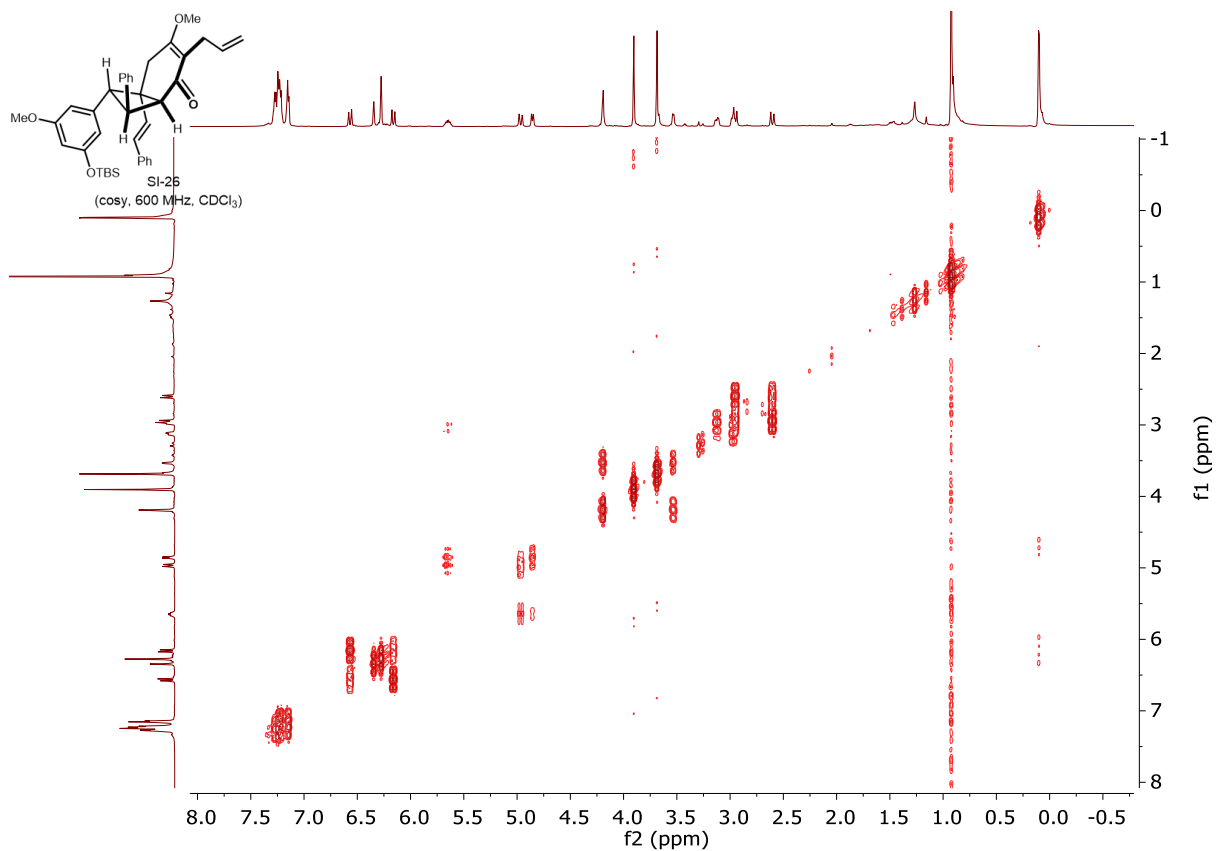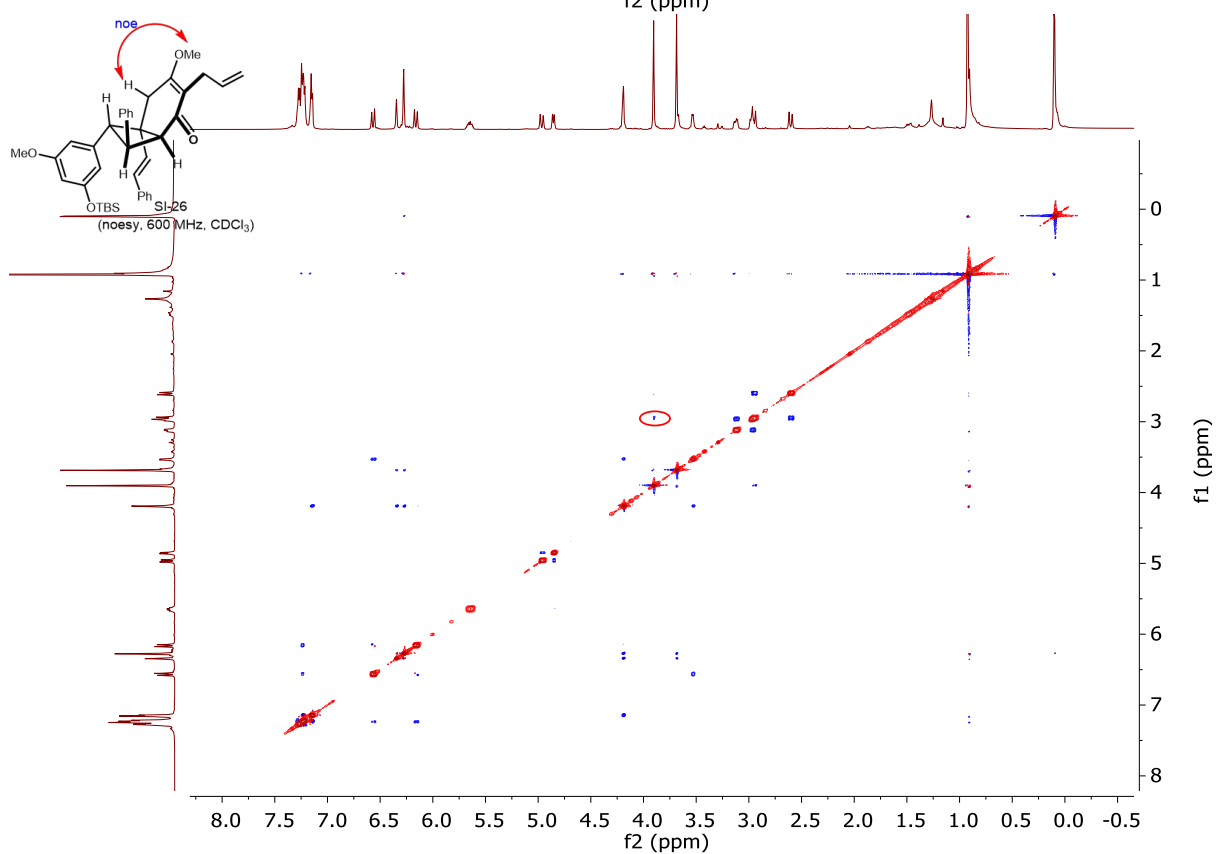

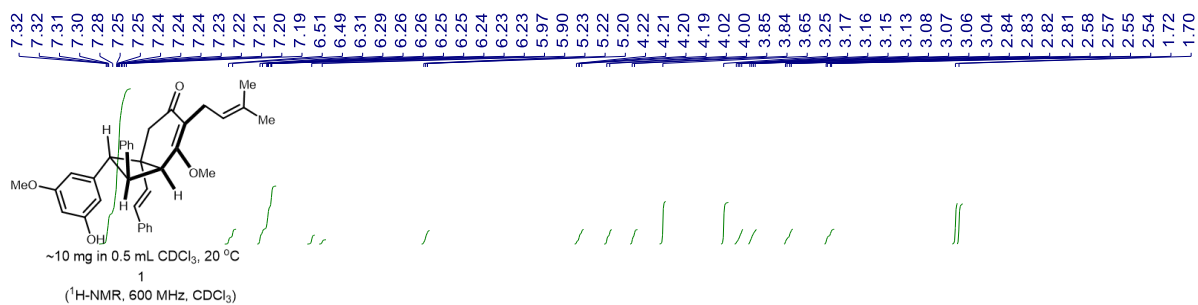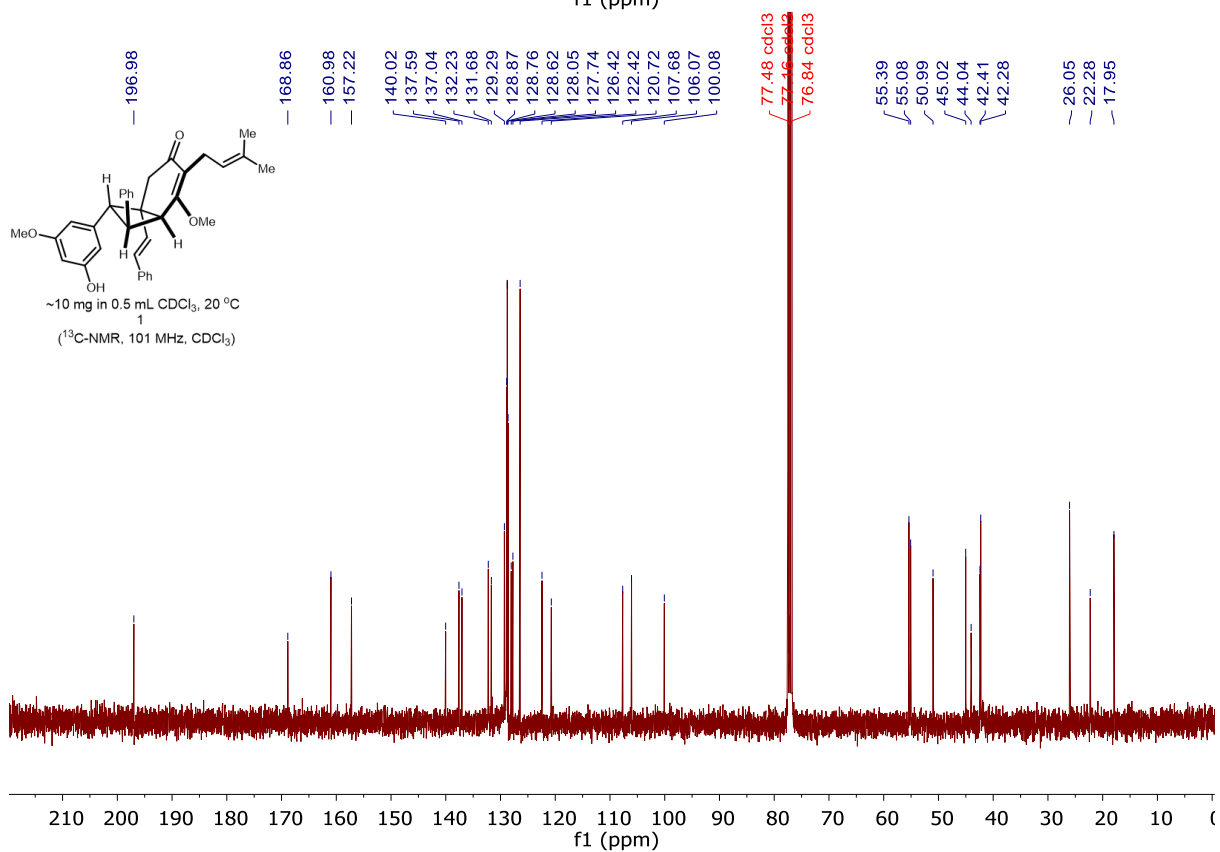

Supplement: Supplementary file 1 [file 21950733]
